# Supplementary material for: An Updated Polygenic Index Repository: Expanded Phenotypes, New Cohorts, and Improved Causal Inference
Source: bioRxiv preprint, doi:10.1101/2025.05.14.653986, version 2 (2025-08-14)
Supplement: Supplementary Tables [file 653986_file06.xlsx]

## Sheet: 1. E(R2)
Supplementary Table 1: Expected predictive power of PGIs
Phenotype		Dataset(s)	New in v2?	Updated in v2?	N UKB	N 23andMe	N other	Total N	# SNPs MTAG	Mean χ2	# SNPs ldsc	h2SNP	SE	GWAS-equivalent N	E(R2)
Anthropometric
	Body Mass Index (BMI)	UKB1, UKB2, UKB3, Locke et al.			438476	N/A	322154	760630	1987862	3.913	1035993	0.2473	0.0094	582457	0.17458
	Height	23andMe, Yengo et al. EUR excl 23andMe		X	N/A	2502262	1597374	4099636	1015435	21.188	996180	0.2308	0.0114	3839667	0.216165
Biomarkers
	Blood lipids - HDL cholesterol	Graham et al.	X		N/A	N/A	1244580	1244580	6472888	2.805	1167506	0.1088	0.0228	1244580	0.0753934
	Blood lipids - LDL cholesterol	Graham et al.	X		N/A	N/A	1231289	1231289	6471011	2.6	1167163	0.1012	0.026	1231289	0.0683084
	Blood lipids - nonHDL cholesterol	Graham et al.	X		N/A	N/A	926571	926571	6445351	2.312	1171339	0.1017	0.0183	926571	0.0621363
	Blood lipids - Total cholesterol	Graham et al.	X		N/A	N/A	1320016	1320016	6472914	2.824	1168034	0.0927	0.0137	1320015	0.0622008
	Blood lipids - Tryglycerids	Graham et al.	X		N/A	N/A	1253277	1253277	6472842	3.166	1167783	0.1038	0.018	1253277	0.0710366
	Blood Pressure - Diastolic	Evangelou et al.	X		N/A	N/A	757601	757601	6073770	2.658	1167690	0.126	0.0061	757600	0.0773694
	Blood Pressure - Pulse	Evangelou et al.	X		N/A	N/A	745820	745820	6012498	2.504	1165766	0.1189	0.005	745819	0.0709171
	Blood Pressure - Systolic	Evangelou et al.	X		N/A	N/A	745820	745820	6011907	2.646	1165504	0.1298	0.0057	745819	0.0801339
Cognition and Education
	Alzheimer's	23andMe, Wightman et al excl 23andMe, Bellenguez et al., Kunkle et al.		X	N/A	363646	1314264	1677910	5245060	1.196	927985	0.048	0.0103	237732	0.00767016
	Childhood Reading	23andMe			N/A	172503	N/A	172503	6068158	1.199	1158581	0.0688	0.0044	172502	0.0113615
	Cognitive Performance	UKB1, UKB2, UKB3, Trampush et al.			225056	N/A	35298	260354	6244879	1.872	1163744	0.2315	0.0084	222914	0.107043
	Educational Attainment	23andMe, Okbay et al. excl 23andMe		X	N/A	2272216	765283	3.0375e+06	5689608	6.004	1062680	0.1326	0.0034	2155939	0.109598
	Highest Math	23andMe			N/A	430439	N/A	430439	6070107	2.119	1157962	0.1509	0.0044	430439	0.0784409
	Self-Rated Math Ability	23andMe			N/A	564692	N/A	564692	6070704	2.42	1157810	0.1467	0.0041	564692	0.0850787
Fertility and Sexual Development
	Age First Birth	23andMe, Mills et al.		X	N/A	9370	542901	552271	4114723	1.643	1077709	0.1689	0.0068	181585	0.0571317
	Age First Menses	23andMe, Day et al. excl 23andMe			N/A	76831	252514	329345	5743131	2.05	1105694	0.1951	0.0066	309043	0.0977886
	Age First Sex	Mills et al.	X		N/A	N/A	397338	397338	6543540	1.928	1116235	0.1455	0.005	397338	0.0713993
	Age Voice Deepened	23andMe			N/A	55871	N/A	55871	5886973	1.092	1159915	0.0946	0.0107	55870	0.00765853
	Childlessness - Men	UKB1, UKB2, UKB3	X		136935	N/A	N/A	136935	6483169	1.083	1175548	0.0605	0.0071	83060	0.00467543
	Childlessness - Pooled	Mathieson et al.	X		N/A	N/A	450082	450082	6502679	1.271	1173037	0.036	0.002	450082	0.00765464
	Childlessness - Women	UKB1, UKB2, UKB3	X		221923	N/A	N/A	221923	6488420	1.168	1175715	0.0524	0.0037	190180	0.00746352
	Number Ever Born - Men	UKB1, UKB2, UKB3, Barban et al. excl 23andMe		X	136935	N/A	92935	229870	2001404	1.133	1051424	0.0508	0.0047	127936	0.00496483
	Number Ever Born - Pooled	Mathieson et al.	X		N/A	N/A	785604	785604	6600592	1.369	1172862	0.0283	0.0013	785604	0.00765125
	Number Ever Born - Women	UKB1, UKB2, UKB3, Barban et al. excl 23andMe		X	221923	N/A	211595	433518	2001626	1.308	1051264	0.0846	0.0047	180081	0.0171313
Health
	Allergy - Cat	23andMe			N/A	46646	N/A	46646	5152018	1.098	1121673	0.1	0.0134	46646	0.00721353
	Allergy - Dust	23andMe			N/A	46646	N/A	46646	5152018	1.081	1121559	0.083	0.0127	46646	0.0050311
	Allergy - Pollen	23andMe, UKB1, UKB2, UKB3		X	444155	46646	N/A	490801	4113243	1.212	1129099	0.1126	0.0118	87047	0.0158112
	Asthma	23andMe, UKB1, UKB2, UKB3, Tsuo et al. All excl UKB		X	445909	15072	1369372	1830353	3227424	2.056	903445	0.1349	0.0108	353336	0.0597224
	Asthma/Eczema/Rhinitis	23andMe, UKB1, UKB2, UKB3, Ferreira et al. excl 23andMe		X	427398	135538	242569	805505	5581200	1.714	1154655	0.0811	0.0064	503850	0.032856
	Breast Cancer	UKB1, UKB2, UKB3, Zhang et al.	X		241943	N/A	247173	489116	5998587	1.518	1144665	0.108	0.0104	300842	0.0379391
	COPD	UKB1, UKB2, UKB3, GBMI All excl UKB		X	445965	N/A	992289	1438254	4132281	1.427	907105	0.0474	0.0025	492884	0.013284
	Coronary Artery Disease	Nelson et al., Aragam et al.	X		N/A	N/A	1502644	1502644	6390352	1.613	1140347	0.0619	0.0044	621056	0.0241727
	Eczema	UKB1, UKB2, UKB3		X	322279	N/A	N/A	322279	6490296	1.057	1175711	0.0104	0.0022	274065	0.000471643
	Hayfever	23andMe, UKB1, UKB2, UKB3		X	387323	15072	N/A	402395	4108704	1.549	1127801	0.1483	0.0112	169683	0.0438192
	Inflammatory Bowel Disease	UKB1, UKB2, UKB3, Liu et al.	X		420726	N/A	34652	455378	5845682	1.239	1163321	0.3236	0.0304	46467	0.0648467
	Migraine	23andMe, UKB1, UKB2, UKB3, Hautakangas et al.		X	425654	283985	588413	1298052	5607108	1.662	1150055	0.0601	0.0027	654740	0.023804
	Nearsightedness	23andMe, Hysi et al.		X	N/A	191843	260974	452817	5790010	2.454	1165747	0.241	0.011	371584	0.144311
	Prostate Cancer	UKB1, UKB2, UKB3, Schumacher et al.	X		135335	N/A	140306	275641	6200257	1.439	1155661	0.1279	0.0152	198252	0.0379946
	Self-Rated Health	23andMe, UKB1, UKB2, UKB3			444386	758713	N/A	1203099	5956904	2.467	1161643	0.0933	0.0024	911102	0.0546947
	Type-II Diabetes	Mahajan et al. 2022	X		N/A	N/A	933970	933970	6632275	1.685	1166183	0.0484	0.0026	933969	0.0207965
Personality, Well-Being and Skills
	Adventurousness	23andMe			N/A	557923	N/A	557923	6070564	1.805	1157731	0.0815	0.0033	557923	0.0351364
	Agreeableness	23andMe			N/A	59176	N/A	59176	5882648	1.087	1154997	0.0859	0.0094	59175	0.00670897
	Cognitive Empathy	23andMe			N/A	46861	N/A	46861	5883313	1.081	1161389	0.1043	0.0125	46861	0.00785631
	Conscientiousness	23andMe			N/A	59176	N/A	59176	5882648	1.098	1155047	0.0991	0.0091	59176	0.00882353
	Delay Discounting	23andMe			N/A	23217	N/A	23217	6073966	1.026	1160968	0.0741	0.0173	23217	0.00206545
	Extraversion	23andMe, Van den Berg et al.			N/A	59225	63030	122255	5033701	1.29	1115500	0.1973	0.0106	73906	0.0385746
	Left out of Social Activity	23andMe			N/A	507804	N/A	507804	6070335	1.525	1157595	0.0581	0.0023	507803	0.0191517
	Life Satisfaction: Family	UKB1, UKB2, UKB3			168313	N/A	N/A	168313	6485582	1.165	1176072	0.0716	0.0043	141864	0.0103663
	Life Satisfaction: Finance	UKB1, UKB2, UKB3			169051	N/A	N/A	169051	6485525	1.159	1176069	0.0713	0.0049	134080	0.00979905
	Life Satisfaction: Friends	UKB1, UKB2, UKB3			168001	N/A	N/A	168001	6485346	1.176	1176059	0.0763	0.0049	138807	0.0114475
	Life Satisfaction: Work	UKB1, UKB2, UKB3			115038	N/A	N/A	115038	6480657	1.086	1175937	0.075	0.0079	66733	0.00577453
	Loneliness	UKB1, UKB2, UKB3			439525	N/A	N/A	439525	6492148	1.273	1176212	0.04	0.0021	410968	0.0086023
	Morning Person	23andMe, UKB1, UKB2, UKB3			401076	91967	N/A	493043	5073973	2.1	1141073	0.1584	0.0052	362840	0.0774969
	Musical Beat Synchronization	23andMe	X		N/A	606824	N/A	606824	5994901	1.534	1115591	0.0506	0.0019	606824	0.017129
	Narcissism	23andMe			N/A	452535	N/A	452535	6070099	1.375	1157640	0.0468	0.0025	452535	0.0122096
	Neuroticism	23andMe, UKB1, UKB2, UKB3, de Moor et al. (2015)			361688	59206	63666	484560	4353421	2.11	1047840	0.1262	0.006	389237	0.0568096
	Openness	23andMe, de Moor et al. (2012)			N/A	59176	17375	76551	1894573	1.175	999638	0.1119	0.0083	72308	0.013297
	Physical Activity	23andMe, Wang et al.		X	N/A	265934	608595	874529	5766478	1.508	1118659	0.0572	0.0024	490222	0.018218
	Religious attendance	UKB1, UKB2, UKB3			444842	N/A	N/A	444842	6492220	1.317	1176220	0.0518	0.0023	383466	0.0128836
	Recharge by Socializing	23andMe			N/A	476144	N/A	476144	6070315	1.289	1158084	0.0343	0.0017	476143	0.00733873
	Religious Belief	23andMe			N/A	86529	N/A	86529	6062699	1.104	1160534	0.0694	0.0058	86528	0.00631391
	Risk Tolerance	23andMe, Linner et al. excl <23andMe, STR>			N/A	969309	458558	1427867	5705829	1.998	1088849	0.0513	0.0022	1070480	0.0245151
	Subjective Well-Being	23andMe, UKB1, UKB2, UKB3, Okbay et al. 1kG excl <23andMe, UKB>		X	169219	728752	95886.1	993857	5158995	1.707	1060258	0.0769	0.0028	497893	0.0299563
Psychiatric
	Anorexia Nervosa	Watson et al.	X		N/A	N/A	72517	72517	5290110	1.24	994872	0.1761	0.0127	72517	0.0309033
	Attention Deficit Hyperactivity Disorder (ADHD)	23andMe, Demontis et al. 2023		X	N/A	62380	225534	287914	5235492	1.389	1052343	0.0904	0.0043	231543	0.0233803
	Autism Spectrum Disorder	Grove et al.	X		N/A	N/A	46350	46350	6009133	1.164	1079498	0.2014	0.0156	46350	0.0271155
	Bipolar Disorder	UKB1, UKB2, UKB3, Mullins et al.	X		78102	N/A	413466	491568	5913050	1.53	1122712	0.0697	0.0026	443295	0.0236922
	Depressive Symptoms	23andMe, UKB1, UKB2, UKB3, Wray excl UKB and 23andMe			404984	307354	230241	942579	5799310	1.797	1156062	0.0722	0.0025	619272	0.0308292
	Insomnia	23andMe, Jansen excl 23andMe	X		N/A	944460	386533	1330993	5779969	1.89	1120651	0.0449	0.0013	1135428	0.0206255
	Schizophrenia	UKB1, UKB2, UKB3, Trubetskoy et al.	X		75799	N/A	161405	237204	6023754	1.969	1149436	0.3255	0.0114	167145	0.154792
Substance use
	Alcohol Misuse	23andMe, UKB1, UKB2, UKB3, Walters et al.		X	131660	19407	46568	197635	5844322	1.225	1158680	0.0984	0.0061	126291	0.0168835
	Age Smoking Initiation	23andMe, Saunders et al. EUR excl 23andMe	X		N/A	81419	323386	404805	6159459	1.309	1148188	0.054	0.0029	330306	0.0123743
	Cannabis Use	23andMe, UKB1, UKB2, UKB3, Stringer et al.			144112	22771	35297	202180	4860547	1.256	1105010	0.0827	0.0055	156756	0.0146936
	Cigarettes per Day	23andMe, Saunders et al. 23andMe EUR		X	N/A	76186	326497	402683	6159637	1.541	1146269	0.1094	0.0139	299375	0.0386304
	Drinks per Week	23andMe, Saunders et al. 23andMe EUR		X	N/A	403938	666978	1070916	6160353	1.703	1149682	0.043	0.0019	900182	0.0168623
	Ever Smoker	23andMe, Saunders et al. 23andMe EUR		X	N/A	623146	805431	1428577	6156002	2.703	1157018	0.0848	0.0028	1150055	0.0525003
	Smoking Cessation	23andMe, Saunders et al. 23andMe EUR	X		N/A	244329	388313	632642	6161609	1.509	1109315	0.0597	0.0026	524041	0.0204604
Notes: "New in v2?" indicates whether the phenotype is added to the Repository in the current release. "Updated in v2?" indicates whether the PGI for a phenotype that was included in the first release of the Repository was updated (e.g. weights based on a new GWAS) in the current release. The remaining columns were obtained using the MTAG meta-analysis with the largest sample size for the phenoty…

## Sheet: 2. UKB GWAS
Supplementary Table 2: Details of release 2 UKB GWAS
Phenotype		phenotype is new in release 2	phenotype was included in release 1 but UKB was not included in GWAS	phenotype was included in release 1, UKB GWAS updated in release 2		release 2						release 1
						UKB data field(s)	Phenotype measure	N - UKB1	N - UKB2	N - UKB3		UKB data field(s)	Phenotype measure	N - UKB1	N - UKB2	N - UKB3
Biomarkers
	Blood lipids - HDL cholesterol	X				34, 54, 55, 74, 3166, 21003, 30760, 30762, 30897, sex	For each of the two measurements, logarithm of HDL cholesterol (field 30760) is residualized on - age indicator: age winsorized at 50 and 78 - sex - 5-year age bin - sex interactions - 20-quantiles of sampling time (field 3166) - fasting time (field 74), winsorized at 1 and 18 - 20-quantiles of estimated sample dilution factor (field 30897) - assessment center (field 54) - assessment month: 100* …	129761	129398	129452		N/A
	Blood lipids - LDL cholesterol	X				34, 54, 55, 74, 3166, 20003, 21003, 30780, 30782, 30897, sex	For each of the two measurements, LDL cholesterol (field 30780) is first adjusted for statin usage by multiplying it by 1.46155 if field 20003 is coded as one of the following: 1140861958, 1140888594, 1140888648, 1141146234, 1141192410, 1140861922, 1141146138. Then logarithm of adjusted LDL cholesterol is residualized on - age indicator: age winsorized at 50 and 78 - sex - 5-year age bin - sex in…	141191	140895	140841		N/A
	Blood lipids - non-HDL cholesterol	X				34, 54, 55, 74, 3166, 20003, 21003, 30690, 30692, 30760, 30762, 30897, sex	For each of the two measurements, total cholesterol (field 30690) is first adjusted for statin usage by multiplying it by 1.33588 if field 20003 is coded as one of the following: 1140861958, 1140888594, 1140888648, 1141146234, 1141192410, 1140861922, 1141146138. HDL cholesterol is then subtracted from this value to obtain nonHDL cholesterol. Then logarithm of nonHDL cholesterol is residualized on…	129735	129376	129430		N/A
	Blood lipids - Total cholesterol	X				34, 54, 55, 74, 20003, 21003, 30690, 3166, 30692, 30897, sex	For each of the two measurements, total cholesterol (field 30690) is first adjusted for statin usage by multiplying it by 1.33588 if field 20003 is coded as one of the following: 1140861958, 1140888594, 1140888648, 1141146234, 1141192410, 1140861922, 1141146138. Then logarithm of adjusted total cholesterol is residualized on - age indicator: age winsorized at 50 and 78 - sex - 5-year age bin - se…	141429	141148	141090		N/A
	Blood lipids - Tryglycerids	X				34, 54, 55, 74, 3166, 21003, 30870, 30872, 30897, sex	For each of the two measurements, logarithm of tryglycerides (field 30870) is residualized on - age indicator: age winsorized at 50 and 78 - sex - 5-year age bin - sex interactions - 20-quantiles of sampling time (field 3166) - fasting time (field 74), winsorized at 1 and 18 - 20-quantiles of estimated sample dilution factor (field 30897) - assessment center (field 54) - assessment month: 100* [b…	141331	141035	140964		N/A
	Blood Pressure - Diastolic	X				94, 4079, 6153, 6177, 21003, sex	First, the average of the four readings (two automatic: field 4079, two manual: field 94) is taken. The obtained value is adjusted for medication by adding 10 if any of field 6153 or field 6177 is coded 2. The value is set to missing if information about medication is missing (both of fields 6153 and 6177 are missing, -1 or -3). Finally, the value is residualized on sex, third-degree polynomial i…	147811	147629	147585		N/A
	Blood Pressure - Pulse	X				93, 94, 4079, 4080, 6153, 6177, 21003, sex	Pulse pressure is calculated as the difference between the medication-adjusted systolic and diastolic blood pressure, and residualized on sex, third-degree polynomial in age, and all age-sex interactions.	147810	147628	147585		N/A
	Blood Pressure - Systolic	X				93, 4080, 6153, 6177, 21003, sex	First, the average of the four readings (two automatic: field 4080, two manual: field 93) is taken. The obtained value is adjusted for medication by adding 15 if any of field 6153 or field 6177 is coded 2. The value is set to missing if information about medication is missing (both of fields 6153 and 6177 are missing, -1 or -3). Finally, the value is residualized on sex, third-degree polynomial i…	147810	147628	147585		N/A
Cognition and Education
	Educational attainment			X		845, 6138	Years of education: 20 if "College or university degree" (field 6138 = 1) 13 if "Alevels/AS levels or equivalent" (field 6138 = 2) 10 if "Olevels/GCSEs or equivalent" or "CSEs or equivalent" (field 6138 = 3 or 4) "Age left schooling" (field 845) - 5 if "NVQ or HND or HNC or equivalent" (field 6138 = 5) 15 if "Other professional qualifications (e.g. nursing teaching)" (field 6138 = 6) 7 if "None o…	147220	146982	146983		6138	Years of education: 20 if "College or university degree", 13 if "Alevels/AS levels or equivalent", 10 if "Olevels/GCSEs or equivalent" or "CSEs or equivalent", 19 if "NVQ or HND or HNC or equivalent", 15 if "Other professional qualifications (e.g. nursing teaching)", 7 if "None of the above".	147466	147314	147311
Fertility and Sexual Development
	Age First Sex	X				2139	For each measurement, set to field 2139 if it is greater than 11, to missing otherwise. The final phenotype is set to the minimum of all measurements.	132308	129868	130255		N/A
	Childlessness (Men)	X				2405, 21003	Set to 1 if number ever born (men) as defined below is 0, to 0 if number ever born (men) is greater than 0	48062	44425	44448		N/A
	Childlessness (Women)	X				2734, 21003	Set to 1 if number ever born (women) as defined below is 0, to 0 if number ever born (women) is greater than 0	76188	72953	72782		N/A
	Number Ever Born (Men)			X		2405, 21003	For each measurement, set to field 2405 if it is non-negative and the respondent is at least 55 years old at the time, to missing otherwise. The final phenotype is set to the maximum of all measurements.	48062	44425	44448		2405	"How many children have you fathered?"	66333	68075	68106
	Number Ever Born (Women)			X		2734, 21003	For each measurement, set to field 2734 if it is non-negative and the respondent is at least 45 years old at the time, to missing otherwise. The final phenotype is set to the maximum of all measurements.	76188	72953	72782		2734	"How many children have you given birth to? (Please include live births only)"	81881	79971	79992
Health
	Allergy - Pollen		X			40001, 40002, 41270, 41271 GP data: read_2, read_3	Set to 1 if any of the following hold: - ever coded "Allergic rhinitis due to pollen" (J301) in ICD10 in-patient summary diagnoses (field 41270) or in the death register primary (field 40001) / secondary (field 40002) causes - ever coded "Allergic rhinitis due to pollen" (4770) in ICD9 in-patient summary diagnoses (field 41271) - ever self-reported to have COPD (field 20002 = 1112 or 1113, or fie…	148063	148045	148047		N/A
	Asthma			X		40001, 40002, 41270, 41271, 20002, 6152, 22127 GP data: read_2, read_3	Set to 1 if any of the following hold, 0 otherwise: - ever coded "asthma" (J450-J459) or "status asthmaticus" (J46) in ICD10 in-patient summary diagnoses (field 41270) or in the death register primary (field 40001) / secondary (field 40002) causes - ever coded asthma (493..) in ICD9 in-patient summary diagnoses (field 41271) - ever self-reported to have asthma diagnosis (field 20002 equal to 1111…	148641	148630	148638		41202, 41204, 20002, 6152	Set to 1 if respondent - has been diagnosed with Asthma (main or secondary ICD10 code equal to J450,J451, J458, J459 or J46), or - self-reported to have had asthma (non-cancer illness code equal to 1111 or selected asthma in data-field 6152); 0 otherwise.	148654	148652	148659
	Asthma/Eczema/Rhinitis			X		40001, 40002, 41270, 41271, 20002, 6152, 22127 GP data: read_2, read_3	Set to 1 if any of the following hold, 0 otherwise. - Asthma=1 or Eczema=1 or Hayfever=1. - ever self-reported (field 6152) to have hayfever, allergic rhinitis or eczema (=9)	142239	142562	142597		41202, 41204, 20002, 6152	Set to 1 if Asthma=1 or Eczema=1 or Hayfever=1, 0 if all are equal to 0.	148653	148652	148658
	Breast cancer	X				20001, 22001, 40001, 40002, 40006, 40013, 41270, 41271	For individuals with genetic sex = female (field 22001), set to 1 if any of the following hold, 0 otherwise: - ever coded "malignant neoplasm of breast" (C50.) or "carcinoma in situ of breast" (D05.) in ICD10 in-patient summary diagnoses (field 41270), in the death register primary (field 40001) / secondary (field 40002) causes, or in the cancer register (field 40006) - ever coded "malignant neop…	81905	80031	80007		N/A
	Chronic Obstructive Pulmonary Disease (COPD)			X		6152, 20002, 22128, 22129, 22130, 40001, 40002, 40006, 40013, 41270, 41271 GP data: read_2, read_3	Set to 1 if any of the following hold: - ever coded "simple and mucopurulent chronic bronchitis" (J41.), "unspecified chronic bronchitis" (J42), "emphysema" (J43.) or "other chronic obstructive pulmonary disease" (J44.) in ICD10 in-patient summary diagnoses (field 41270) or in the death register primary (field 40001) / secondary (field 40002) causes - ever coded "chronic bronchitis" (491.), emphy…	148411	148397	148381		41202, 41204, 20002, 6152	Set to 1 if subject has been diagnosed with COPD (main or secondary ICD diagnosis is equal to J410, J411, J418, J42, J430, J431, J432, J438, J439, J440, J441, J448, J449, J982 or J983) or if subject self-reported to have had COPD (non-cancer illness code 1112), 0 otherwise.	148654	148652	148659
	Coronary Artery Disease	X				6150, 20002, 20004, 40001, 40002, 41270, 41271, 41272, 41273	Set to 1 if any of the following hold: - ever coded "angina pectoris" (I20.), "acute myocardial infarction" (I21.), "subsequent myocardial infarction" (I22.), "certain current complications following acute myocardial infarction" (I23.), "other acute ischaemic heart diseases"(I24.), "atherosclerotic heart disease" (I251), "old myocardial infarction" (I252), "ischaemic cardiomyopathy" (I255), "sile…	148461	148438	148469		N/A
	Eczema			X		40001, 40002, 41270, 41271, 20002, 6152 GP data: read_2, read_3	Set to 1 if any of the following hold, - ever coded "atopic dermatitis" (L20, L208, L209) in ICD10 in-patient summary diagnoses (field 41270) or in the death register primary (field 40001) / secondary (field 40002) causes - ever coded "atopic dermatitis" (691, 6918, 69180) in ICD9 in-patient summary diagnoses (field 41271) - In the GP data, ever coded as one of the following: .L23. , .L232 , .L23…	106333	108183	107763		41202, 41204, 20002, 6152	Set to 1 if subject has been diagnosed with Eczema (main or secondary ICD diagnosis is equal to L20, L208 or J209) or if subject self-reported to have Eczema (non-cancer illness code 1452), 0 otherwise.	146934	146635	146608
	Hayfever			X		40001, 40002, 41270, 41271, 20002, 22126, 6152 GP data: read_2, read_3	Set to 1 if any of the following hold: - ever coded allergic rhinitis (J301-J304) in ICD10 in-patient summary diagnoses (field 41270) or in the death register primary (field 40001) / secondary (field 40002) causes - ever coded allergic rhinitis (477, 4770, 4778, 4779) in ICD9 in-patient summary diagnoses (field 41271) - ever self-reported to have allergic rhinitis (field 20002=1387 or field 22126…	129696	128878	128749		41202, 41204, 20002, 6152	Set to 1 if respondent - has been diagnosed with hayfever (main or secondary ICD10 code equal to J301,J302, J303 or J304, or - self-reported to have hayfever (non-cancer illness code equal to 1387 or selected "Hayfever, allergic rhinitis or eczema" in data-field 6152); 0 otherwise.	148653	148652	148658
	Inflammatory Bowel Disease	X				40001, 40002, 41270, 41271 GP data: read_2, read_3	Set to 1 if any of the following hold: - ever coded Crohn's disease or ulcerative colitis (K500-K519, K523, K528) in ICD10 in-patient summary diagnoses (field 41270) or in the death register primary (field 40001) / secondary (field 40002) causes - ever coded Crohn's disease or ulcerative colitis (5550, 5551, 5552, 5559, 5569) in ICD9 in-patient summary diagnoses (field 41271) - In the GP data, ev…	140201	140286	140239		N/A
	Migraine			X		40001, 40002, 41270, 41271, 20002, 120016 GP data: read_2, read_3	Set to 1 if any of the following hold: - ever coded "migraine" (G43.) in ICD10 in-patient summary diagnoses (field 41270) or in the death register primary (field 40001) / secondary (field 40002) causes - ever coded "migraine" (346.) in ICD9 in-patient summary diagnoses (field 41271) - self-reported to have migraine (field 20002 = 1265 or field 120016 = 1) - In the GP data, ever coded as one of th…	141942	141873	141839		41202, 41204, 20002	Set to 1 if - subject has been diagnosed with migraine (main or secondary ICD10 code equal to G430, G431, G432, G433, G438, G439), or - self-reported to have migraines (non-cancer illness code equal to 1265); 0 otherwise.	137322	136376	136310
	Nearsightedness			X		40001, 40002, 41270, 41271, 6147, 20262 GP data: read_2, read_3	Set to 1 if any of the following hold, - ever coded "degenerative myopia" or "myopia" (H442, H521) in ICD10 in-patient summary diagnoses (field 41270) or in the death register primary (field 40001) / secondary (field 40002) causes - ever coded "myopia" (3671) in ICD9 in-patient summary diagnoses (field 41271) - ever self-reported to wears glasses or contact lenses because of myopia (field 6147 = …	73639	54128	54646		2207, 6147, 20262	1) "Do you wear glasses or contact lenses to correct your vision?" Yes/No 2) "Why were you prescribed glasses/contacts? (You can select more than one answer)" Set to 1 if - myopia classification (data field 20262) is "highly myopic" or "moderate/low myopia" or - response to (1) is "Yes" and response to (2) is "short-sightedness" Set to 0 if - response to (1) is "No" or - response to (1) is "Yes" …	71789	51874	52400
	Prostate Cancer	X				20001, 22001, 40001, 40002, 40006, 40013, 41270, 41271	For individuals with genetic sex = male (field 22001), set to 1 if any of the following hold, 0 otherwise: - ever coded "malignant neoplasm of prostate" (C61) or "carcinoma in situ of other and unspecified genital organs- prostate" (D075) in ICD10 in-patient summary diagnoses (field 41270), in the death register primary (field 40001) / secondary (field 40002) causes, or in the cancer register (fi…	66736	68599	68631		N/A
	Type-II diabetes	X				40001, 40002, 41270, 41271 GP data: read_2, read_3	Set to 1 if any of the following hold: - ever coded "non-insulin-dependent diabetes mellitus" (E110-E119) in ICD10 in-patient summary diagnoses (field 41270) or in the death register primary (field 40001) / secondary (field 40002) causes - ever coded as having adult-onset diabetes mellitus (25000, 25010, 25020, 25090) in ICD9 in-patient summary diagnoses (field 41271) - In the GP data, ever coded…	148354	148280	148312		N/A
Psychiatric
	Anorexia Nervosa	X				20003, 20122, 20126, 20499, 20500, 20544, 40001, 40002, 41270, 41271, 130893 GP data: read_2, read_3	Set to 1 if any of the following hold: - ever coded as having anorexia nervosa (F500, F501) in ICD10 in-patient summary diagnoses (field 41270) or in the death register primary (field 40001) / secondary (field 40002) causes -ever coded as having anorexia nervosa (3071) in ICD9 in-patient summary diagnoses (field 41271) - ever self-reported to have anorexia nervosa diagnosed by a doctor (field 205…
	Bipolar Disorder	X				20002, 20003, 20122, 20126, 20499, 20500, 20544, 40001, 40002, 41270, 41271, 130893 GP data: read_2, read_3	Set to 1 if any of the following hold: - ever coded as having bipolar affective disorder (F310, F319) in ICD10 in-patient summary diagnoses (field 41270) or in the death register primary (field 40001) / secondary (field 40002) causes -ever coded as having "manic-depressive psychosis, manic type" (2960), "manic-depressive psychosis, depressed type" (2961), "manic-depressive psychosis, other and un…	30116	23840	24146		N/A
	Insomnia	X				1200	For each measurement, insomnia was set to 1 if field 1200 = 3, 0 if it is non-missing and not equal to -3, missing otherwise. Phenotype is set to the maximum across waves.	148573	148527	148531		N/A
	Schizophrenia	X				20002, 20003, 20122, 20126, 20499, 20500, 20544, 40001, 40002, 41270, 41271, 130893 GP data: read_2, read_3	Set to 1 if any of the following hold: - ever coded as having schizophrenia or schizoaffective disorder (F200-F209, F250-F259) in ICD10 in-patient summary diagnoses (field 41270) or in the death register primary (field 40001) / secondary (field 40002) causes - ever coded as having "Schizophrenic psychosis, paranoid type" (2953) or "schizophrenic psychosis, unspecified" (2959) in ICD9 in-patient s…	29386	23047	23366		N/A
Substance use
	Age Smoking Initiation	X				2867, 3436	Set to the minimum of age at smoking initiation for past (field 2867) and current (field 3436) smokers. Values less than or equal to 0 are set to missing.	48319	48912	48487		N/A
	Smoking Cessation	X				20116	For each measurement, smoking cessation is set to 1 if field 20116 is equal to 1 and to 0 if it is equal to 2. The final phenotype is set to the latest non-missing value.	67331	68869	68808		N/A
Notes: "UKB1", "UKB2" and "UKB3" are the three UKB partitions (see section "UKB GWAS" in Methods for details on partitioning). After the phenotypes were constructed as in this table, they were additionally residualized on a third degree polynomial in birth year, sex and their interactions, 106 genotyping batch dummies, and the first 40 PCs within each partition before GWAS.

## Sheet: 3. Prediction results
Supplementary Table 3: Predictive power of the PGIs in the validation datasets
			Health and Retirement Study (HRS)				Wisconsin Longitudinal Study (WLS)				UK Biobank - 3rd partition (UKB3)
			N	ΔR2 (95% CI)	v1 ΔR2 (95% CI)		N	ΔR2 (95% CI)	v1 ΔR2 (95% CI)		N	ΔR2 (95% CI)	v1 ΔR2 (95% CI)
Phenotype
Anthropometric
	Body Mass Index (BMI)		12666	13.64% (12.52% to 14.69%)	12.70% (11.63% to 13.78%)		8183	13.31% (12.01% to 14.44%)	13.55% (12.29% to 14.90%)		145971	12.51% (12.22% to 12.81%)	13.05% (12.74% to 13.37%)
	Height		12670	36.53% (35.22% to 37.86%)	26.34% (24.87% to 27.73%)		8103	36.10% (34.34% to 38.10%)	27.13% (25.41% to 28.74%)		148286	43.21% (42.74% to 43.59%)	32.56% (32.12% to 32.96%)
Biomarkers
	Blood lipids - HDL cholesterol		N/A				N/A				129452	23.31% (22.87% to 23.72%)	N/A
	Blood lipids - LDL cholesterol		N/A				N/A				140841	21.67% (21.27% to 22.08%)	N/A
	Blood lipids - nonHDL cholesterol		4885	6.43% (5.20% to 7.74%)	N/A		7961	10.34% (9.07% to 11.57%)	N/A		129430	21.81% (21.37% to 22.22%)	N/A
	Blood lipids - Total cholesterol		N/A				N/A				141090	21.75% (21.34% to 22.11%)	N/A
	Blood lipids - Tryglycerids		N/A				N/A				140964	16.53% (16.15% to 16.88%)	N/A
	Blood Pressure - Diastolic		12528	3.32% (2.76% to 3.94%)	N/A		8315	6.22% (5.33% to 7.22%)	N/A		147585	11.61% (11.30% to 11.88%)	N/A
	Blood Pressure - Pulse		12528	6.89% (6.09% to 7.69%)	N/A		N/A				147585	11.15% (10.87% to 11.45%)	N/A
	Blood Pressure - Systolic		12528	4.25% (3.64% to 4.91%)	N/A		8315	7.27% (6.31% to 8.40%)	N/A		147585	11.89% (11.57% to 12.18%)	N/A
Cognition and Education
	Alzheimer's		11367	1.29% (0.87% to 1.81%)	N/A		8477	1.04% (0.65% to 1.54%)	N/A		131310	1.82% (1.67% to 1.99%)	N/A
	Childhood Reading		N/A				N/A				N/A
	Cognitive Performance		N/A				7983	7.74% (6.67% to 8.79%)	7.71% (6.67% to 8.85%)		74231	8.10% (7.72% to 8.48%)	7.86% (7.50% to 8.22%)
	Educational Attainment		12630	14.11% (12.93% to 15.25%)	10.13% (9.11% to 11.20)		8243	8.66% (7.52% to 9.81%)	6.17% (5.27% to 7.13%)		146983	13.39% (13.08% to 13.69%)	10.5% (10.22% to 10.77%)
	Highest Math		N/A				N/A				N/A
	Self-Rated Math Ability		N/A				N/A				N/A
Fertility and Sexual Development
	Age First Birth		N/A				7638	1.82% (1.30% to 2.49%)	1.92% (1.37% to 2.51%)		64650	3.46% (3.17% to 3.74%)	1.15% (0.99% to 1.32%)
	Age First Menses		N/A				3865	11.60% (9.70% to 13.59%)	8.47% (6.85% to 10.14%)		77759	12.39% (11.96% to 12.83%)	8.78% (8.39% to 9.13%)
	Age First Sex		N/A				N/A				130255	3.87% (3.65% to 4.08%)	N/A
	Number Ever Born - Women		6786	0.33% (0.12% to 0.66%)	0.40% (0.16% to 0.78%)		4083	0.78% (0.37% to 1.37%)	0.53% (0.17% to 1.09%)		72782	0.70% (0.58% to 0.82%)	0.89% (0.76% to 1.03%)
Health
	Allergy - Pollen		N/A				3232	0.04% (0.00% to 0.31%)	N/A		148047	0.29% (0.23% to 0.35%)	N/A
	Asthma		9193	1.44% (0.99% to 1.96%)	1.05% (0.64% to 1.53%)		7853	2.30% (1.67% to 3.01%)	1.17% (0.75% to 1.68%)		148638	2.64% (2.48% to 2.82%)	1.61% (1.48% to 1.73%)
	Asthma/Eczema/Rhinitis		N/A				1687	2.58% (1.25% to 4.28%)	2.06% (0.98% to 3.73%)		142597	4.17% (3.97% to 4.37%)	1.18% (1.08% to 1.29%)
	Breast Cancer		2866	1.28% (0.58% to 2.26%)	N/A		4400	1.26% (0.67% to 2.04%)	N/A		80007	2.08% (1.87% to 2.29%)	N/A
	COPD		12669	1.76% (1.31% to 2.23%)	N/A		8176	0.79% (0.45% to 1.24%)	N/A		148381	0.83% (0.74% to 0.92%)	N/A
	Coronary Artery Disease		12669	1.49% (1.06% to 1.95%)	N/A		2094	2.87% (1.66% to 4.34%)	N/A		148469	2.15% (2.00% to 2.30%)	N/A
	Hayfever		N/A				3232	0.90% (0.34% to 1.71%)	1.11% (0.53% to 1.95%)		128749	2.35% (2.19% to 2.52%)	2.19% (2.05% to 2.34%)
	Inflammatory Bowel Disease		N/A				N/A				140239	0.21% (0.16% to 0.26%)	N/A
	Migraine		12666	0.97% (0.66% to 1.30%)	N/A		N/A				141839	1.45% (1.32% to 1.57%)	0.59% (0.51% to 0.68%)
	Nearsightedness		565	0.99% (0.04% to 3.31%)	N/A		N/A				54646	7.46% (7.04% to 7.85%)	4.51% (4.18% to 4.85%)
	Prostate Cancer		2090	0.99% (0.27% to 2.10%)	N/A		4077	4.79% (3.49% to 6.25%)	N/A		68631	1.82% (1.62% to 2.05%)	N/A
	Self-Rated Health		10973	4.44% (3.76% to 5.20%)	3.03% (2.36% to 3.73%)		8129	3.78% (3.02% to 4.58%)	3.32% (2.65% to 4.08%)		148062	4.66% (4.45% to 4.87%)	3.83% (3.63% to 4.02%)
	Type-II Diabetes		12669	7.31% (6.48% to 8.20%)	N/A		7541	5.87% (4.88% to 6.83%)	N/A		148312	3.48% (3.29% to 3.65%)	N/A
Personality, Well-Being and Skills
	Adventurousness		11824	2.08% (1.61% to 2.60%)	1.41% (1.02% to 1.89%)		N/A				N/A
	Extraversion		11884	1.57% (1.19% to 2.03%)	1.58% (1.15% to 2.08%)		8173	2.01% (1.47% to 2.72%)	1.90% (1.40% to 2.51%)		N/A
	Left out of Social Activity		N/A				N/A				N/A
	Life Satisfaction: Family		11399	0.85% (0.54% to 1.22%)	0.89% (0.57% to 1.32%)		7719	0.38% (0.15% to 0.71%)	0.34% (0.13% to 0.63%)		56141	0.67% (0.54% to 0.80%)	0.65% (0.52% to 0.80%)
	Life Satisfaction: Friends		4738	0.46% (0.16% to 0.92%)	0.54% (0.23% to 1.01%)		N/A				56084	0.65% (0.52% to 0.79%)	0.67% (0.53% to 0.81%)
	Morning Person		N/A				N/A				133572	5.00% (4.77% to 5.21%)	4.41% (4.20% to 4.63%)
	Musical Beat Synchronization		N/A				N/A				N/A
	Narcissism		N/A				N/A				N/A
	Neuroticism		11914	3.31% (2.71% to 3.92%)	2.77% (2.21% to 3.44%)		8169	3.31% (2.63% to 4.09%)	2.83% (2.17% to 3.53%)		120043	3.92% (3.70% to 4.15%)	2.55% (2.39% to 2.72%)
	Openness		11892	0.82% (0.54% to 1.18%)	0.84% (0.54% to 1.22%)		8164	0.99% (0.60% to 1.47%)	1.15% (0.78% to 1.70%)		N/A
	Physical Activity		12669	1.48% (1.07% to 1.94%)	1.47% (1.05% to 1.92%)		8027	0.97% (0.55% to 1.50%)	0.76% (0.43% to 1.15%)		N/A
	Religious attendance		12669	1.36% (0.99% to 1.77%)	1.38% (0.99% to 1.83%)		8444	0.84% (0.50% to 1.26%)	0.75% (0.43% to 1.13%)		148238	0.98% (0.89% to 1.08%)	1% (0.90% to 1.10%)
	Risk Tolerance		8893	0.26% (0.09% to 0.50%)	0.13% (0.02% to 0.34%)		6045	0.03% (0.00% to 0.17%)	0.03% (0.00% to 0.17%)		143597	1.62% (1.50% to 1.75%)	1.53% (1.41% to 1.65%)
	Subjective Well-Being		11849	2.67% (2.13% to 3.24%)	2.49% (1.91% to 3.13%)		8153	1.34% (0.87% to 1.88%)	1.49% (0.97% to 2.07%)		30390	1.43% (1.17% to 1.69%)	1.38% (1.20% to 1.60%)
Psychiatric
	Anorexia Nervosa		N/A				N/A				12520	0.07% (0.01% to 0.18%)	N/A
	Attention Deficit Hyperactivity Disorder (ADHD)		755	1.07% (0.06% to 3.08%)	0.24% (0.00 to 1.66%)		N/A				22960	0.02% (0.00% to 0.07%)	N/A
	Autism Spectrum Disorder		N/A				N/A				12407	0.01% (0.00% to 0.07%)	N/A
	Bipolar Disorder		804	0.10% (0.00% to 1.58%)	N/A		N/A				24146	1.52% (1.19% to 1.84%)	N/A
	Depressive Symptoms		10967	1.65% (1.22% to 2.15%)	1.57% (1.15% to 2.08%)		8154	1.59% (1.13% to 2.18%)	1.53% (1.06% to 2.05%)		134767	1.99% (1.84% to 2.13%)	1.93% (1.79% to 2.06%)
	Insomnia		12667	1.51% (1.15% to 1.96%)	N/A		2081	0.53% (0.07% to 1.34%)	N/A		148531	1.36% (1.25% to 1.48%)	N/A
	Schizophrenia		805	0.34% (0.00% to 2.29%)	N/A		N/A				23366	1.51% (1.15% to 1.87%)	N/A
Substance use
	Alcohol Misuse		9580	0.11% (0.02% to 0.30%)	0.09% (0.00% to 0.32%)		6654	0.63% (0.31% to 1.07%)	0.26% (0.08% to 0.53%)		40698	1.13% (0.93% to 1.34%)	1.08% (0.88% to 1.29%)
	Age Smoking Initiation		1325	0.51% (0.02% to 1.66%)	N/A		4475	0.68% (0.32% to 1.20%)	N/A		48487	0.67% (0.53% to 0.83%)	N/A
	Cannabis Use		N/A				N/A				44599	1.30% (1.10% to 1.52%)	1.27% (1.07% to 1.48%)
	Cigarettes per Day		6348	0.92% (0.53% to 1.42%)	0.93% (0.48% to 1.46%)		2828	3.09% (1.90% to 4.38%)	2.12% (1.19% to 3.16%)		46309	2.90% (2.48% to 3.34%)	2.02% (1.76% to 2.28%)
	Drinks per Week		12669	1.54% (1.19% to 1.98%)	1.33% (0.95% to 1.82%)		6822	2.10% (1.55% to 2.75%)	1.91% (1.35% to 2.53%)		128516	2.28% (2.13% to 2.43%)	1.60% (1.47% to 1.75%)
	Ever Smoker		12670	5.27% (4.57% to 6.09%)	4.91% (4.11% to 5.72%)		8184	4.78% (3.94% to 5.70%)	4.25% (3.44% to 5.09%)		148596	5.44% (5.21% to 5.66%)	4.25% (4.05% to 4.43%)
	Smoking Cessation		7258	1.96% (1.37% to 2.66%)	N/A		2883	0.92% (0.34% to 1.77%)	N/A		68808	1.34% (1.17% to 1.50%)	N/A
Notes: All phenotypes are residualized: As a general rule, if a single measurement in time was available, we residualized the phenotype on a second-degree polynomial in age, sex, and their interactions. If multiple measurements were available, we either did the same residualization in each wave and took the mean across waves or we took the maximum across waves and then residualized on birth year,…

## Sheet: 4. Parental PGI results
Supplementary Table 4: Causal effects and population associations in UKB and WLS
Phenotype		Phenotype scale		UKB														WLS															Meta-Analysis UKB + WLS
				Population Association (ψ)				Causal Effect (δ)				δ:ψ Ratio			ψ-δ difference			Population Association (ψ)				Causal Effect (δ)				δ:ψ Ratio			ψ-δ difference			Population Association (ψ)				Causal Effect (δ)				δ:ψ Ratio		ψ-δ difference
Anthropometric				N	ψ	SE	95% CI	N	δ	SE	95% CI	δ/ψ	SE	95% CI	ψ-δ	SE		N	ψ	SE	95% CI	N	δ	SE	95% CI	δ/ψ	SE	95% CI	ψ-δ	SE		N	ψ	SE	95% CI	N	δ	SE	95% CI	δ/ψ	SE	ψ-δ	SE	P	PHB
	Body Mass Index (BMI)	Continuous		147585	0.241577	0.00253844	(0.237, 0.247)	39044	0.253644	0.00745938	(0.239, 0.268)	1.04995	0.0327897	(0.99, 1.11)	-0.0120669	0.00787947		4285	0.353728	0.0143951	(0.326, 0.382)	3792	0.312054	0.0251716	(0.263, 0.361)	0.882187	0.0797042	(0.73, 1.04)	0.0416737	0.0289971		151870	0.244959	0.00249987	(0.240, 0.250)	42836	0.258359	0.00715195	(0.244, 0.272)	1.02567	0.0303239	-0.00837159	0.00760374	2.7E-01	0.502759
	Height	Continuous		148286	0.596482	0.0020815	(0.592, 0.601)	39530	0.546619	0.00578305	(0.535, 0.558)	0.916406	0.0102091	(0.90, 0.94)	0.0498623	0.00614624		4302	0.565147	0.0131013	(0.539, 0.591)	3801	0.572736	0.0238543	(0.526, 0.619)	1.01343	0.0483067	(0.92, 1.11)	-0.00758843	0.0272153		152588	0.59571	0.00205572	(0.592, 0.600)	43331	0.548069	0.00562025	(0.537, 0.559)	0.920554	0.00998843	0.0470744	0.00599526	4.0E-15	7.2e-14
Biomarkers
	Blood lipids - HDL cholesterol	Continuous		129452	0.440816	0.00249733	(0.436, 0.446)	37632	0.423289	0.0077716	(0.408, 0.439)	0.960241	0.0184503	(0.92, 1.00)	0.0175264	0.00816299		NA				NA				NA			NA			129452	0.440816	0.00249733	(0.436, 0.446)	37632	0.423289	0.0077716	(0.408, 0.439)	0.960241	0.0184503	0.0175264	0.00816299	3.2E-02	0.144
	Blood lipids - LDL cholesterol	Continuous		140841	0.450106	0.00237953	(0.445, 0.455)	37576	0.449864	0.00746187	(0.435, 0.464)	0.999462	0.0173997	(0.97, 1.03)	0.000242022	0.00783209		NA				NA				NA			NA			140841	0.450106	0.00237953	(0.445, 0.455)	37576	0.449864	0.00746187	(0.435, 0.464)	0.999462	0.0173997	0.000242022	0.00783209	9.8E-01	1
	Blood lipids - nonHDL cholesterol	Continuous		129430	0.443436	0.00249063	(0.439, 0.448)	34549	0.451782	0.00772928	(0.437, 0.467)	1.01882	0.0183457	(0.98, 1.05)	-0.00834551	0.00812065		3184	0.252174	0.0171494	(0.219, 0.286)	1897	0.249921	0.0379792	(0.175, 0.324)	0.991067	0.165001	(0.67, 1.31)	0.00225263	0.0416716		132614	0.439486	0.00246477	(0.435, 0.444)	36446	0.443754	0.00757402	(0.429, 0.459)	1.01848	0.0182333	-0.00795777	0.00797072	3.2E-01	0.576
	Blood lipids - Total cholesterol	Continuous		141090	0.443074	0.00238769	(0.438, 0.448)	37632	0.446805	0.00755825	(0.432, 0.462)	1.00842	0.0179033	(0.97, 1.04)	-0.00373069	0.00792643		NA				NA				NA			NA			141090	0.443074	0.00238769	(0.438, 0.448)	37632	0.446805	0.00755825	(0.432, 0.462)	1.00842	0.0179033	-0.00373069	0.00792643	6.4E-01	0.869268
	Blood lipids - Tryglycerids	Continuous		140964	0.358248	0.00249416	(0.353, 0.363)	37604	0.3445	0.00772018	(0.329, 0.360)	0.961625	0.0225658	(0.92, 1.01)	0.0137478	0.00811308		NA				NA				NA			NA			140964	0.358248	0.00249416	(0.353, 0.363)	37604	0.3445	0.00772018	(0.329, 0.360)	0.961625	0.0225658	0.0137478	0.00811308	9.0E-02	0.285882
	Blood Pressure - Diastolic	Continuous		147585	0.31223	0.00248066	(0.307, 0.317)	39354	0.323025	0.00788496	(0.308, 0.338)	1.03457	0.0265577	(0.98, 1.09)	-0.0107952	0.00826597		4430	0.208145	0.0153296	(0.178, 0.238)	3885	0.260933	0.0270706	(0.208, 0.314)	1.25361	0.159496	(0.94, 1.57)	-0.0527879	0.0311097		152015	0.309574	0.00244881	(0.305, 0.314)	43239	0.318169	0.00757036	(0.303, 0.333)	1.04048	0.026197	-0.0135643	0.00798878	9.0E-02	0.285882
	Blood Pressure - Pulse	Continuous		147585	0.309925	0.00248005	(0.305, 0.315)	39354	0.309614	0.00793621	(0.294, 0.325)	0.998998	0.0268257	(0.95, 1.05)	0.00031056	0.00831469		NA				NA				NA			NA			147585	0.309925	0.00248005	(0.305, 0.315)	39354	0.309614	0.00793621	(0.294, 0.325)	0.998998	0.0268257	0.00031056	0.00831469	9.7E-01	1
	Blood Pressure - Systolic	Continuous		147585	0.320724	0.00247731	(0.316, 0.326)	39354	0.320796	0.00783492	(0.305, 0.336)	1.00022	0.0256214	(0.95, 1.05)	-7.19425e-05	0.00821724		4430	0.239057	0.0154743	(0.209, 0.269)	3885	0.311364	0.0275519	(0.257, 0.365)	1.30247	0.142798	(1.02, 1.58)	-0.0723077	0.0316		152015	0.318683	0.00244616	(0.314, 0.323)	43239	0.32009	0.00753613	(0.305, 0.335)	1.00965	0.0252187	-0.00464717	0.00795275	5.6E-01	0.84
Cognition and Education
	Alzheimer's	Binary		148638	1.37582	0.0227955	(1.316, 1.439)	39586	1.33104	0.0807871	(1.136, 1.559)	0.896289	0.261184	(0.40, 1.39)	0.033089	0.0839416		888	1.19389	0.077475	(1.026, 1.390)	799	1.34924	0.150766	(1.004, 1.813)	1.69029	1.12688	(-0.52, 3.90)	-0.12233	0.169508		149526	1.36036	0.0218686	(1.303, 1.420)	40385	1.33508	0.0712084	(1.161, 1.535)	0.936769	0.254439	0.0024813	0.0752233	9.7E-01	1
	Childhood Reading	NA		NA				NA				NA			NA			NA				NA				NA			NA			NA				NA				NA		NA
	Cognitive Performance	Continuous		74231	0.279222	0.00350949	(0.272, 0.286)	20603	0.235269	0.0111096	(0.213, 0.257)	0.842586	0.0411731	(0.76, 0.92)	0.0439536	0.0116508		4323	0.279356	0.0146155	(0.251, 0.308)	3660	0.191356	0.0270414	(0.138, 0.244)	0.68499	0.10322	(0.48, 0.89)	0.0879998	0.0307384		78554	0.279229	0.00341249	(0.273, 0.286)	24263	0.228927	0.0102762	(0.209, 0.249)	0.820953	0.0382429	0.0494865	0.0108945	5.6E-06	5.04e-05
	Educational Attainment	Continuous		146983	0.352437	0.00248606	(0.348, 0.357)	39224	0.176262	0.00782059	(0.161, 0.192)	0.500123	0.0224687	(0.46, 0.54)	0.176175	0.00820623		4405	0.288735	0.014395	(0.261, 0.317)	3838	0.229636	0.0276387	(0.175, 0.284)	0.795318	0.103611	(0.59, 1.00)	0.0590989	0.0311627		151388	0.350592	0.00244979	(0.346, 0.355)	43062	0.180218	0.00752514	(0.165, 0.195)	0.513382	0.0219583	0.168583	0.00793569	0.0E+00	0
	Highest Math	NA		NA				NA				NA			NA			NA				NA				NA			NA			NA				NA				NA		NA
	Self-Rated Math Ability	NA		NA				NA				NA			NA			NA				NA				NA			NA			NA				NA				NA		NA
Fertility and Sexual Development
	Age First Birth	Continuous		64650	0.185558	0.00387417	(0.178, 0.193)	18624	0.0823873	0.012453	(0.058, 0.107)	0.443997	0.0677484	(0.31, 0.58)	0.103171	0.0130417		4109	0.136891	0.0155929	(0.106, 0.167)	3511	0.0828941	0.0310662	(0.022, 0.144)	0.605546	0.237192	(0.14, 1.07)	0.0539973	0.0347599		68759	0.182728	0.00375986	(0.175, 0.190)	22135	0.0824574	0.0115589	(0.060, 0.105)	0.456183	0.0651432	0.0971027	0.0122106	1.8E-15	4.86e-14
	Age First Menses	Continuous		77759	0.326614	0.00338051	(0.320, 0.333)	22440	0.319998	0.0103934	(0.300, 0.340)	0.979741	0.0333984	(0.91, 1.05)	0.0066168	0.0109294		1991	0.290805	0.0215264	(0.249, 0.333)	1874	0.316035	0.037239	(0.243, 0.389)	1.08676	0.151227	(0.79, 1.38)	-0.0252309	0.0430131		79750	0.325752	0.00333958	(0.319, 0.332)	24314	0.319711	0.0100108	(0.300, 0.339)	0.984718	0.0326125	0.00468529	0.0105928	6.6E-01	0.869268
	Age First Sex	Continuous		130255	0.197944	0.00272318	(0.193, 0.203)	35060	0.138994	0.00880323	(0.122, 0.156)	0.702187	0.0455103	(0.61, 0.79)	0.0589503	0.0092148		NA				NA				NA			NA			130255	0.197944	0.00272318	(0.193, 0.203)	35060	0.138994	0.00880323	(0.122, 0.156)	0.702187	0.0455103	0.0589503	0.0092148	1.6E-10	2.16e-09
	Number Ever Born - Women	Continuous		72782	0.0869299	0.00368652	(0.080, 0.094)	20268	0.0705263	0.0119521	(0.047, 0.094)	0.811301	0.141731	(0.53, 1.09)	0.0164036	0.0125077		6225	0.0888197	0.0127247	(0.064, 0.114)	1850	0.143032	0.0403755	(0.064, 0.222)	1.61036	0.509772	(0.61, 2.61)	-0.0542122	0.0423332		79007	0.0870762	0.00354092	(0.080, 0.094)	22118	0.0763681	0.0114605	(0.054, 0.099)	0.868636	0.136551	0.010734	0.0119951	3.7E-01	0.644516
Health
	Allergy - Pollen	Binary		148047	1.31371	0.0140669	(1.278, 1.350)	39437	1.291	0.0473745	(1.177, 1.417)	0.936098	0.180207	(0.57, 1.31)	0.0174361	0.0494189		1801	0.862062	0.116882	(0.686, 1.084)	1431	0.857673	0.239088	(0.537, 1.370)	1.03439	1.80504	(-2.50, 4.57)	0.00510437	0.266129		149848	1.30583	0.0139661	(1.271, 1.342)	40868	1.27121	0.046471	(1.161, 1.392)	0.937068	0.179316	0.0170251	0.0485882	7.3E-01	0.876
	Asthma	Binary		148638	1.26159	0.00698692	(1.244, 1.279)	39586	1.22322	0.0218767	(1.172, 1.277)	0.867108	0.0976898	(0.68, 1.06)	0.03088	0.0229653		888	1.42525	0.0473284	(1.299, 1.564)	799	1.40546	0.0858702	(1.188, 1.663)	0.960537	0.274197	(0.42, 1.50)	0.0139839	0.0980494		149526	1.26487	0.00691201	(1.248, 1.282)	40385	1.23362	0.0211995	(1.183, 1.286)	0.877631	0.0920239	0.0300012	0.0223602	1.8E-01	0.422609
	Asthma/Eczema/Rhinitis	Binary		142597	1.50691	0.00579259	(1.490, 1.524)	37916	1.49489	0.0184503	(1.442, 1.550)	0.980463	0.0470773	(0.89, 1.07)	0.00801139	0.0193382		888	1.30162	0.0793687	(1.114, 1.521)	799	2.03309	0.151121	(1.512, 2.734)	2.69167	0.992676	(0.75, 4.64)	-0.445944	0.170696		143485	1.50574	0.00577722	(1.489, 1.523)	38715	1.50165	0.0183143	(1.449, 1.557)	0.984303	0.0470244	0.00225884	0.0192153	9.1E-01	1
	Breast Cancer	Binary		80007	1.29664	0.0109025	(1.269, 1.325)	23004	1.25283	0.0388022	(1.161, 1.352)	0.867677	0.153743	(0.57, 1.16)	0.0343744	0.0403048		2302	1.06721	0.0681503	(0.934, 1.220)	2098	0.887454	0.131859	(0.685, 1.149)	-1.83567	2.79443	(-7.31, 3.64)	0.184443	0.148429		82309	1.29035	0.0107656	(1.263, 1.318)	25102	1.21887	0.0372239	(1.133, 1.311)	0.859519	0.15351	0.0446799	0.0388963	2.5E-01	0.502759
	COPD	Binary		148381	1.4632	0.0106754	(1.433, 1.494)	39534	1.30174	0.0375708	(1.209, 1.401)	0.692815	0.100603	(0.50, 0.89)	0.116922	0.0390581		4347	1.33477	0.0455932	(1.221, 1.460)	3829	1.31331	0.0864061	(1.109, 1.556)	0.943868	0.334286	(0.29, 1.60)	0.0162088	0.0976972		152728	1.45623	0.0103943	(1.427, 1.486)	43363	1.30357	0.0344547	(1.218, 1.395)	0.713665	0.096335	0.103043	0.0362672	4.5E-03	0.027
	Coronary Artery Disease	Binary		140860	1.54378	0.00846088	(1.518, 1.570)	37712	1.46252	0.0297728	(1.380, 1.550)	0.875483	0.0706546	(0.74, 1.01)	0.0540691	0.0309517		1172	1.09568	0.0625298	(0.969, 1.239)	922	0.950584	0.128946	(0.738, 1.224)	-0.554646	1.46139	(-3.42, 2.31)	0.142049	0.143307		142032	1.53429	0.00838448	(1.509, 1.560)	38634	1.43098	0.0290096	(1.352, 1.515)	0.872148	0.0705722	0.0579903	0.0302541	5.5E-02	0.212143
	Hayfever	Binary		128749	1.49557	0.00792655	(1.473, 1.519)	34420	1.49402	0.0258121	(1.420, 1.572)	0.997436	0.0670695	(0.87, 1.13)	0.00103201	0.0270018		1801	1.43507	0.111517	(1.153, 1.786)	1431	1.54388	0.193019	(1.058, 2.254)	1.20235	0.650643	(-0.07, 2.48)	-0.0730897	0.222918		130550	1.49526	0.0079066	(1.472, 1.519)	35851	1.49489	0.0255844	(1.422, 1.572)	0.99959	0.066716	-3.97948e-05	0.0268058	1.0E+00	1
	Inflammatory Bowel Disease	Binary		140239	1.3684	0.0186643	(1.319, 1.419)	37275	1.53019	0.062866	(1.353, 1.731)	1.35632	0.216081	(0.93, 1.78)	-0.111755	0.0655781		NA				NA				NA			NA			140239	1.3684	0.0186643	(1.319, 1.419)	37275	1.53019	0.062866	(1.353, 1.731)	1.35632	0.216081	-0.111755	0.0655781	8.8E-02	0.285882
	Migraine	Binary		141839	1.48064	0.00919317	(1.454, 1.508)	37723	1.45994	0.029256	(1.379, 1.546)	0.964116	0.077888	(0.81, 1.12)	0.0140834	0.0306664		NA				NA				NA			NA			141839	1.48064	0.00919317	(1.454, 1.508)	37723	1.45994	0.029256	(1.379, 1.546)	0.964116	0.077888	0.0140834	0.0306664	6.5E-01	0.869268
	Nearsightedness	Binary		54646	1.80629	0.0102785	(1.770, 1.843)	16197	1.64184	0.0305837	(1.546, 1.743)	0.838552	0.0537397	(0.73, 0.94)	0.0954603	0.0322647		NA				NA				NA			NA			54646	1.80629	0.0102785	(1.770, 1.843)	16197	1.64184	0.0305837	(1.546, 1.743)	0.838552	0.0537397	0.0954603	0.0322647	3.1E-03	0.020925
	Prostate Cancer	Binary		68631	1.35547	0.0123141	(1.323, 1.389)	16582	1.25426	0.0494537	(1.138, 1.382)	0.744859	0.165371	(0.42, 1.06)	0.0776001	0.0509637		NA				NA				NA			NA			68631	1.35547	0.0123141	(1.323, 1.389)	16582	1.25426	0.0494537	(1.138, 1.382)	0.744859	0.165371	0.0776001	0.0509637	1.3E-01	0.351
	Self-Rated Health	Continuous		148062	0.20987	0.00254954	(0.205, 0.215)	39462	0.165489	0.00848415	(0.149, 0.182)	0.788532	0.0415452	(0.71, 0.87)	0.0443808	0.00885895		4317	0.170936	0.0150677	(0.141, 0.200)	3812	0.180779	0.0282708	(0.125, 0.236)	1.05759	0.189853	(0.69, 1.43)	-0.00984343	0.0320355		152379	0.208675	0.00251381	(0.204, 0.214)	43274	0.166752	0.00812611	(0.151, 0.183)	0.800827	0.0405848	0.0405288	0.00853848	2.1E-06	2.268e-05
	Type-II Diabetes	Binary		148312	1.91117	0.00990671	(1.874, 1.949)	39502	1.86148	0.0343251	(1.740, 1.991)	0.959325	0.0549876	(0.85, 1.06)	0.0263461	0.0357261		3980	1.86814	0.0480267	(1.700, 2.053)	3561	2.30073	0.093942	(1.914, 2.766)	1.33328	0.18192	(0.98, 1.69)	-0.208283	0.105507		152292	1.9094	0.00970244	(1.873, 1.946)	43063	1.90851	0.0322403	(1.792, 2.033)	0.99063	0.0526356	0.00221093	0.0338387	9.5E-01	1
Personality, Well-Being and Skills
	Adventurousness	NA		NA				NA				NA			NA			NA				NA				NA			NA			NA				NA				NA		NA
	Extraversion	Continuous		NA				NA				NA			NA			4347	0.120069	0.0151248	(0.090, 0.150)	3826	0.161015	0.0284605	(0.105, 0.217)	1.34101	0.291068	(0.77, 1.91)	-0.0409453	0.0322298		4347	0.120069	0.0151248	(0.090, 0.150)	3826	0.161015	0.0284605	(0.105, 0.217)	1.34101	0.291068	-0.0409453	0.0322298	2.0E-01	0.45
	Left out of Social Activity	NA		NA				NA				NA			NA			NA				NA				NA			NA			NA				NA				NA		NA
	Life Satisfaction: Family	Continuous		56141	0.0799821	0.00421316	(0.072, 0.088)	16160	0.0972846	0.0133623	(0.071, 0.123)	1.21633	0.178931	(0.87, 1.57)	-0.0173025	0.0140108		4095	0.0410495	0.0156339	(0.010, 0.072)	3624	0.066279	0.029828	(0.008, 0.125)	1.61461	0.951914	(-0.25, 3.48)	-0.0252295	0.0336769		60236	0.0764503	0.00406803	(0.068, 0.084)	19784	0.0921023	0.0121946	(0.068, 0.116)	1.22992	0.175851	-0.0184721	0.0129359	1.5E-01	0.385714
	Life Satisfaction: Friends	Continuous		56084	0.0777238	0.00420469	(0.069, 0.086)	16045	0.094252	0.0134452	(0.068, 0.121)	1.21265	0.185008	(0.85, 1.58)	-0.0165282	0.0140873		NA				NA				NA			NA			56084	0.0777238	0.00420469	(0.069, 0.086)	16045	0.094252	0.0134452	(0.068, 0.121)	1.21265	0.185008	-0.0165282	0.0140873	2.4E-01	0.502759
	Morning Person	Continuous		133572	0.215065	0.00267016	(0.210, 0.220)	35763	0.215223	0.00879153	(0.198, 0.232)	1.00073	0.0427251	(0.92, 1.08)	-0.000158033	0.00918807		NA				NA				NA			NA			133572	0.215065	0.00267016	(0.210, 0.220)	35763	0.215223	0.00879153	(0.198, 0.232)	1.00073	0.0427251	-0.000158033	0.00918807	9.9E-01	1
	Musical Beat Synchronization	NA		NA				NA				NA			NA			NA				NA				NA			NA			NA				NA				NA		NA
	Narcissism	NA		NA				NA				NA			NA			NA				NA				NA			NA			NA				NA				NA		NA
	Neuroticism	Continuous		120043	0.19429	0.00283455	(0.189, 0.200)	32306	0.196049	0.00934857	(0.178, 0.214)	1.00905	0.0503181	(0.91, 1.11)	-0.00175917	0.00976885		4345	0.16234	0.0150424	(0.133, 0.192)	3824	0.18281	0.0267992	(0.130, 0.235)	1.12609	0.195292	(0.74, 1.51)	-0.0204692	0.0307323		124388	0.193097	0.00278553	(0.188, 0.199)	36130	0.194613	0.00882692	(0.177, 0.212)	1.01634	0.0487267	-0.00347617	0.00930983	7.1E-01	0.876
	Openness	Continuous		NA				NA				NA			NA			4341	0.0810892	0.015248	(0.051, 0.111)	3823	0.0923198	0.0286855	(0.036, 0.149)	1.1385	0.413487	(0.33, 1.95)	-0.0112305	0.0324863		4341	0.0810892	0.015248	(0.051, 0.111)	3823	0.0923198	0.0286855	(0.036, 0.149)	1.1385	0.413487	-0.0112305	0.0324863	7.3E-01	0.876
	Physical Activity	Continuous		NA				NA				NA			NA			4258	0.106937	0.0153323	(0.077, 0.137)	3769	0.0900385	0.0318566	(0.028, 0.152)	0.841977	0.321432	(0.21, 1.47)	0.0168984	0.0353543		4258	0.106937	0.0153323	(0.077, 0.137)	3769	0.0900385	0.0318566	(0.028, 0.152)	0.841977	0.321432	0.0168984	0.0353543	6.3E-01	0.869268
	Religious attendance	Continuous		148238	0.0971979	0.00257929	(0.092, 0.102)	39497	0.0618472	0.00818799	(0.046, 0.078)	0.636301	0.085916	(0.47, 0.80)	0.0353507	0.00858463		4516	0.0967662	0.0148571	(0.068, 0.126)	3928	0.0564509	0.0283559	(0.001, 0.112)	0.583374	0.306419	(-0.02, 1.18)	0.0403153	0.0320124		152754	0.0971853	0.00254128	(0.092, 0.102)	43425	0.0614319	0.00786659	(0.046, 0.077)	0.632444	0.0827256	0.0356838	0.00829167	1.7E-05	0.000131143
	Risk Tolerance	Continuous		143597	0.124981	0.00262676	(0.120, 0.130)	38427	0.130127	0.0087103	(0.113, 0.147)	1.04118	0.0730477	(0.90, 1.18)	-0.00514617	0.00909775		3119	0.0213272	0.0180126	(-0.014, 0.057)	2926	-0.0219987	0.0315637	(-0.084, 0.040)	-1.03148	1.71734	(-4.40, 2.33)	0.043326	0.0363417		146716	0.120463	0.00259927	(0.115, 0.126)	41353	0.119362	0.00839645	(0.103, 0.136)	1.03743	0.0729817	-0.00228759	0.00882541	8.0E-01	0.93913
	Subjective Well-Being	Continuous		56530	0.114328	0.00417144	(0.106, 0.123)	16142	0.126059	0.0135659	(0.099, 0.153)	1.1026	0.125292	(0.86, 1.35)	-0.0117305	0.0141928		4328	0.0931786	0.0152211	(0.063, 0.123)	3825	0.142318	0.0287671	(0.086, 0.199)	1.52737	0.396945	(0.75, 2.31)	-0.0491394	0.0325458		60858	0.112706	0.00402309	(0.105, 0.121)	19967	0.129017	0.01227	(0.105, 0.153)	1.14109	0.119481	-0.0177079	0.0130095	1.7E-01	0.417273
Psychiatric
	Anorexia Nervosa	Binary		23249	1.17409	0.0541947	(1.056, 1.306)	6823	1.36227	0.187495	(0.943, 1.967)	1.92628	1.33712	(-0.81, 4.67)	-0.148662	0.19517		NA				NA				NA			NA			23249	1.17409	0.0541947	(1.056, 1.306)	6823	1.36227	0.187495	(0.943, 1.967)	1.92628	1.33712	-0.148662	0.19517	4.5E-01	0.736364
	Attention Deficit Hyperactivity Disorder (ADHD)	Binary		22960	1.2718	0.126275	(0.993, 1.629)	6748	1.38427	0.539259	(0.481, 3.983)	1.35244	2.35265	(-0.99, 3.70)	-0.0847382	0.553847		NA				NA				NA			NA			22960	1.2718	0.126275	(0.993, 1.629)	6748	1.38427	0.539259	(0.481, 3.983)	1.35244	2.35265	-0.0847382	0.553847	8.8E-01	1
	Autism Spectrum Disorder	Binary		23041	1.29871	0.0833868	(1.103, 1.529)	6769	1.14197	0.30935	(0.623, 2.094)	0.507905	1.19462	(-2.27, 3.28)	0.128618	0.320392		NA				NA				NA			NA			23041	1.29871	0.0833868	(1.103, 1.529)	6769	1.14197	0.30935	(0.623, 2.094)	0.507905	1.19462	0.128618	0.320392	6.9E-01	0.876
	Bipolar Disorder	Binary		24146	1.76682	0.0304547	(1.664, 1.875)	7055	1.99206	0.104505	(1.623, 2.445)	1.21081	0.194701	(0.80, 1.62)	-0.11999	0.108852		NA				NA				NA			NA			24146	1.76682	0.0304547	(1.664, 1.875)	7055	1.99206	0.104505	(1.623, 2.445)	1.21081	0.194701	-0.11999	0.108852	2.7E-01	0.502759
	Depressive Symptoms	Continuous		134767	0.140323	0.00269979	(0.135, 0.146)	36057	0.123404	0.00890404	(0.106, 0.141)	0.879424	0.0656708	(0.75, 1.01)	0.0169197	0.00930434		4330	0.11773	0.0151242	(0.088, 0.147)	3824	0.0899387	0.0273221	(0.036, 0.143)	0.763943	0.251973	(0.27, 1.26)	0.0277908	0.0312288		139097	0.139565	0.00265778	(0.134, 0.145)	39881	0.120191	0.00846582	(0.104, 0.137)	0.872079	0.0635479	0.017806	0.00891698	4.6E-02	0.191077
	Insomnia	Binary		148531	1.28992	0.00588947	(1.275, 1.305)	39571	1.21884	0.0196071	(1.173, 1.267)	0.777361	0.0790894	(0.62, 0.93)	0.0566793	0.0204725		1136	1.1092	0.0645975	(0.977, 1.259)	945	1.31341	0.127613	(1.023, 1.687)	2.63055	2.05047	(-1.39, 6.65)	-0.16899	0.143031		149667	1.28831	0.00586514	(1.274, 1.303)	40516	1.22094	0.0193797	(1.175, 1.268)	0.780114	0.0790306	0.0521488	0.020266	1.0E-02	0.0490909
	Schizophrenia	Binary		23366	2.32242	0.0490237	(2.110, 2.557)	6858	3.06967	0.16455	(2.223, 4.238)	1.33107	0.210082	(0.90, 1.76)	-0.278961	0.171698		NA				NA				NA			NA			23366	2.32242	0.0490237	(2.110, 2.557)	6858	3.06967	0.16455	(2.223, 4.238)	1.33107	0.210082	-0.278961	0.171698	1.0E-01	0.3
Substance use
	Alcohol Misuse	Continuous		40698	0.103828	0.00494673	(0.094, 0.114)	11854	0.0991144	0.0156283	(0.068, 0.130)	0.954599	0.157241	(0.65, 1.26)	0.00471391	0.0163925		3586	0.0727824	0.0168787	(0.040, 0.106)	3068	0.0428615	0.0285474	(-0.013, 0.099)	0.588899	0.415326	(-0.23, 1.40)	0.0299209	0.0331639		44284	0.100951	0.00474706	(0.092, 0.110)	14922	0.0861429	0.0137085	(0.059, 0.113)	0.908753	0.147055	0.00966323	0.0146953	5.1E-01	0.81
	Age Smoking Initiation	Continuous		48487	0.0844128	0.00455233	(0.075, 0.093)	12405	0.0685619	0.015666	(0.038, 0.099)	0.812221	0.190687	(0.44, 1.19)	0.0158509	0.016314		2422	0.0862114	0.0205046	(0.046, 0.126)	2053	0.060582	0.0373214	(-0.013, 0.134)	0.702714	0.464048	(-0.21, 1.61)	0.0256294	0.0425831		50909	0.0844964	0.00444412	(0.076, 0.093)	14458	0.0673665	0.014445	(0.039, 0.096)	0.796402	0.176376	0.0171024	0.0152343	2.6E-01	0.502759
	Cannabis Use	Binary		44599	1.33799	0.0122192	(1.306, 1.370)	13031	1.20257	0.0395605	(1.113, 1.300)	0.633528	0.138223	(0.36, 0.91)	0.106705	0.0414046		NA				NA				NA			NA			44599	1.33799	0.0122192	(1.306, 1.370)	13031	1.20257	0.0395605	(1.113, 1.300)	0.633528	0.138223	0.106705	0.0414046	1.0E-02	0.0490909
	Cigarettes per Day	Continuous		46309	0.132019	0.00462932	(0.123, 0.141)	12012	0.124813	0.0143665	(0.097, 0.153)	0.945418	0.113759	(0.72, 1.17)	0.00720591	0.015094		1692	0.156595	0.0242504	(0.109, 0.204)	1136	0.144493	0.0504571	(0.046, 0.243)	0.922717	0.352477	(0.23, 1.61)	0.0121022	0.0559822		48001	0.132814	0.0045472	(0.124, 0.142)	13148	0.126289	0.0138174	(0.099, 0.153)	0.943276	0.108261	0.00753773	0.0145736	6.1E-01	0.869268
	Drinks per Week	Continuous		128516	0.149841	0.00283139	(0.144, 0.155)	34160	0.138629	0.00903014	(0.121, 0.156)	0.925173	0.0627493	(0.80, 1.05)	0.0112122	0.00946362		3586	0.116331	0.0167455	(0.084, 0.149)	3236	0.0758543	0.0265573	(0.024, 0.128)	0.652055	0.246833	(0.17, 1.14)	0.0404769	0.0313959		132102	0.14879	0.00279176	(0.143, 0.154)	37396	0.132123	0.00854942	(0.115, 0.149)	0.908594	0.0608149	0.0136497	0.00906094	1.3E-01	0.351
	Ever Smoker	Binary		148596	1.61313	0.0057445	(1.595, 1.631)	39578	1.58796	0.0189067	(1.530, 1.648)	0.967104	0.0412106	(0.89, 1.05)	0.0157303	0.0197601		4353	1.53834	0.0332125	(1.441, 1.642)	3831	1.60896	0.0637498	(1.420, 1.823)	1.10421	0.170757	(0.77, 1.44)	-0.0448818	0.0718826		152949	1.61091	0.00566045	(1.593, 1.629)	43409	1.58964	0.0181263	(1.534, 1.647)	0.97465	0.0400604	0.0114718	0.0190533	5.5E-01	0.84
	Smoking Cessation	Binary		68808	1.34426	0.00952553	(1.319, 1.370)	17508	1.31646	0.0331657	(1.234, 1.405)	0.929348	0.116499	(0.70, 1.16)	0.0209022	0.0345065		3980	1.27493	0.0617158	(1.130, 1.439)	3561	1.13856	0.11889	(0.902, 1.437)	0.534262	0.507959	(-0.46, 1.53)	0.113122	0.133954		72788	1.34261	0.00941405	(1.318, 1.368)	21069	1.30273	0.031946	(1.224, 1.387)	0.909604	0.113551	0.0266409	0.0334156	4.3E-01	0.725625
Notes: "Population association" is the coefficient of the PGI from a regression that controls for sex, a second degree polynomial in age, their interactions and the top 10 PCs. "Causal effect" is the coefficient from a regression that additionally controls for parental PGIs. In UKB, the population association was estimated using the third partition (UKB3). In WLS, it was estimated in a subset of …

## Sheet: 5.Mostafavi Replication
Supplementary Table 5: Causal effects and population associations in UKB by demographic groups (Mostafavi et al. replication)
Panel A. Interaction models
Phenotype	Model	Group	Beta	SE	95% CI	Beta ratio	SE	95% CI
BMI	Causal Effect	Younger	0.227303	0.0117618	(0.204, 0.250)	1.053	0.072	(0.911, 1.195)
		Older	0.215873	0.01225	(0.192, 0.240)
	Population Association	Younger	0.230597	0.00883265	(0.213, 0.248)	1.028	0.044	(0.942, 1.115)
		Older	0.224208	0.0091179	(0.206, 0.242)
BPdia	Causal Effect	Female	0.340286	0.0108734	(0.319, 0.362)	1.12221	0.0602315	(1.004, 1.240)
		Male	0.303229	0.0127504	(0.278, 0.328)
	Population Association	Female	0.33924	0.00653251	(0.326, 0.352)	1.13483	0.0356007	(1.065, 1.205)
		Male	0.298935	0.00763424	(0.284, 0.314)
Panel B. Stratified models
Phenotype	Model	Group	Incremental R2	SE	95% CI	Incremental R2 ratio	SE	95% CI
BMI	Causal Effect	Younger	0.07017	0.00373	(0.061, 0.075)	1.14388	0.15139	(0.941, 1.508)
		Older	0.02182	0.00199	(0.017, 0.025)
	Population Association	Younger	0.02496	0.00207	(0.020, 0.028)	1.09633	0.0884	(0.952, 1.301)
		Older	0.064	0.00368	(0.054, 0.069)
BPdia	Causal Effect	Female	0.03712	0.0026	(0.034, 0.044)	1.20413	0.14903	(1.040, 1.616)
		Male	0.03083	0.00289	(0.025, 0.036)
	Population Association	Female	0.11407	0.00454	(0.107, 0.125)	1.26667	0.08838	(1.148, 1.487)
		Male	0.09005	0.00497	(0.080, 0.010)

## Sheet: 6. Dataset details
Supplementary Table 5: Dataset details
Dataset	Subsample	Full name	Dataset profile	N PGI	Genotyping platform	Pre-imputation SNP level exclusions				Pre-imputation subject level exclusions		Imputation software and reference panel
						MAF	Call rate	HWE P-value	Other exclusions	Call rate	Other exclusions	Software	Reference panel	Release	Sample
1958BC (NCDS)	N/A	1958 National Child Development Study	[1]	6267	Illumina 1.2M Illumina Human 660-Quad Infinium HumanHap 550K v1.1 Infinium HumanHap 550K v3 Affymetrix v6	0.01	0.97	10-6	1) Allele mismatch with reference panel 2) ID mismatch with reference panel 3) Palindromic SNPs with MAF>0.4 4) Duplicates	0.98	1) Withdrawn consent 2) Excess heterozygosity (3 SD from the mean) 3) Sex mismatch (females with an F value > 0.2 and males with an F value < 0.8) 4) Related to another individual in the sample (king-cutoff 0.0884))	TOPMed Server/ Minimac4	TOPmed	-	All
1970BC (BCS70)	N/A	1970 British Cohort Study	[2]	5393	Infinium Global Screening Array-24 v3.0	0.01	0.97	10-6	1) Allele mismatch with reference panel 2) ID mismatch with reference panel 3) Palindromic SNPs with MAF>0.4 4) Duplicates	0.98	1) Withdrawn consent 2) Excess heterozygosity (3 SD from the mean) 3) Sex mismatch (females with an F value > 0.2 and males with an F value < 0.8) 4) Related to another individual in the sample (king-cutoff 0.0884))	TOPMed Server/ Minimac4	TOPmed	-	All
2001BC (MCS)		Millennium Cohort Study	[3]	17284	Infinium Global Screening Array-24 v1.0	0.01	0.97	10-6	1) Allele mismatch with reference panel 2) ID mismatch with reference panel 3) Palindromic SNPs with MAF>0.4 4) Duplicates	0.98	1) Withdrawn consent 2) Excess heterozygosity (3 SD from the mean) 3) Sex mismatch (females with an F value > 0.2 and males with an F value < 0.8)	TOPMed Server/ Minimac4	TOPmed	-	All
Add Health	N/A	National Longitudinal Study of Adolescent to Adult Health	[4]	5689	Illumina Omni 1.1 and 2.5	0.01	0.98	10-5	1) Allele mismatch with reference panel 2) ID mismatch with reference panel 3) Palindromic SNPs with MAF>0.4 4) Duplicates	0.95 (per chromosome)	1) Genetic-ancestry outliers 2) Sex mismatch 3) Duplicates 4) Autosomal Hetero/Homozygosity Outliers	Michigan Server/Minimac3	HRC	1.1	All
ALSPAC	G0 Mothers & G1 children	Avon Longitudinal Study of Parents and Children	[5]-[7]	17450	Illumina HumanHap550 quad chip Illumina human660W-quad array	0.01	0.95 in mothers & children, then 0.99 in the merged data	Children: 5×10-7 Mothers: 10-6	1) Variants that do not overlap between mothers and children datasets	Children: 0.97 Mothers: 0.95	1) Sex mismatch 2) Autosomal Hetero/Homozygosity Outliers 3) Insufficient sample replication (IBD < 0.8) 4) Individuals of non-European ancestries 5) Indeterminate X chromosome heterozygosity (mothers) 6) ID mismatches in merged data 7) Cryptic relatedness (Children: IBD>0.1, Mothers: IBD>0.125)	ShapeIT (v2.r644) & Michigan Server	HRC	1.1	All
Dunedin	N/A	Dunedin Multidisciplinary Health and Development Study	[8]	887	Illumina HumanOmni Express 12 BeadChip	0.01	0.95	10-5	1) Allele mismatch with reference panel 2) ID mismatch with reference panel 3) Palindromic SNPs with MAF>0.4 4) Duplicates	0.95 (per chromosome)	1) Autosomal hetero/homozygosity outliers (plink F< -0.03 or F>0.03	Michigan Server/Minimac3	HRC	1.1	All
EBB	N/A	Estonian Genome Center, University of Tartu	[9]	210407	Illumina Global Screening Array (GSA) v1.0, v2.0, and v2.0_EST	-	-	-	-	-	1) Non-EUR ancestries 2) Individuals with less than five rows in the health record database over 15 years 3) One MZ twin per pair 4) Autosomal Hetero/Homozygosity Outliers (>3SD)	BEAGLE v2.1.2	Estonian WGS Reference	Mitt et al, EJHG 2017	Eur
ELSA	N/A	English Longitudinal Study of Ageing	[10]	7310	Illumina Omni 2.5–8	0.01	0.98	10-5	1) Allele mismatch with reference panel 2) ID mismatch with reference panel 3) Palindromic SNPs with MAF>0.4 4) Duplicates	0.95	1) Genetic-ancestry outliers 2) Sex mismatch 3) Duplicates 4) Autosomal Hetero/Homozygosity Outliers	Michigan Server/Minimac3	HRC	1.1	All
E-Risk	N/A	Environmental Risk Longitudinal Twin Study	[11]	2316	Illumina HumanOmni Express 24 BeadChip arrays versions 1.1 and 1.2	0.01	0.95	10-5	1) Allele mismatch with reference panel 2) ID mismatch with reference panel 3) Palindromic SNPs with MAF>0.4 4) Duplicates	0.95 (per chromosome)	1) Autosomal hetero/homozygosity outliers (plink F< -0.03 or F>0.03 2) Genetic ancestry outliers (plink Z< -5)	Michigan Server/Minimac3	HRC	1.1	All
FINBB	N/A	Finnish Biobanks	[12]	500348	Various Illumina and Affymetrix chip arrays	-	0.98	10-6	1) Minor allele count < 3	0.95	1) Ambiguous gender 2) Excess heterozygosity (±4SD) 3) Non-Finnish ancestry	Beagle 4.1	Population-specific SISu v4.2 imputation reference panel of 8,554 whole genomes		Finnish
GS	N/A	Generation Scotland	[13]	19966	Illumina HumanOmni ExpressExome8V.1-2_A Illumina HumanOmniExpressExome-8V.1_A	0.01	0.98	10-5	1) Allele mismatch with reference panel 2) ID mismatch with reference panel 3) Palindromic SNPs with MAF>0.4 4) Duplicates	0.95 (per chromosome)	1) Autosomal hetero/homozygosity outliers (plink F< -0.03 or F>0.03 2) Genetic ancestry outliers (plink Z< -5) 3) Sex mismatch 4) Mendelian errors	Michigan Server/Minimac3	HRC	1.1	All
HRS	N/A	Health and Retirement Study	[14]	12670	HumanOmni2.5-4v1, HumanOmni2.5-8v1, HumanOmni2.5-8v1.1	-	0.98	10-4	-	0.98	1) Chromosomal anomalies 2) First-degree relatives	Minimac3	1000 Genomes	p3v5	All
MCTFR	N/A	Minnesota Center for Twin and Family Research	[15]	7634	Illumina 660W-Quad	0.001	0.95	-	1) Palindromic SNPs with MAF>0.4 2) ID mismatch with reference panel	-	-	Michigan Server/Minimac3	HRC	1.1	All
MIDUS	N/A	Midlife in the United States	[16]	1358	Illumina HumanOmniExpress-24v1-0_a, Illumina HumanOmniExpress-24-v1-1-a	-	0.95	10-3	1) Allele mismatch with reference panel 2) ID mismatch with reference panel 3) Palindromic SNPs with MAF>0.4 4) Duplicates	0.97	1) Individuals of non-EUR ancestries	Michigan Server/Minimac3	HRC	1.1	All
SOEP-G	N/A	German Socioeconomic Panel (Gene-SOEP)	[17]	2495	Illumina Infinium Global Screening Array-24 v3.0 BeadChips	0.01	0.9	10-4	1) Allele mismatch with reference panel 2) ID mismatch with reference panel 3) Palindromic SNPs with MAF>0.4 4) Duplicates	0.50 (per chromosome)	1) Autosomal hetero/homozygosity outliers (plink F< -1.5 or F>1) 2) Sex mismatch 3) Individuals of non-EUR ancestries	Michigan Server/Minimac3	HRC	1.1	All
STR	Twingene	Swedish Twin Registry	[18],[19]	9775	Illumina Human Omni Express	0.01	0.98	10-5	1) Allele mismatch with reference panel 2) ID mismatch with reference panel 3) Palindromic SNPs with MAF>0.4 4) Duplicates	0.95 (per chromosome)	1) Sex mismatch 2) Autosomal hetero/homozygosity outliers (plink F< -0.03 or F>0.05 3) Genetic ancestry outliers (plink Z< -5)	Michigan Server/Minimac3	HRC	1.1	All
	SALTY		[18],[19]	17319	InfiniumPsychArray-24 v1.1	0.0001	0.98	10-5	1) Allele mismatch with reference panel 2) ID mismatch with reference panel 3) Palindromic SNPs with MAF>0.4 4) Duplicates	0.95 (per chromosome)	1) Sex mismatch 2) Autosomal hetero/homozygosity outliers (plink F< -0.04 or F>0.03 3) Genetic ancestry outliers (plink Z< -5)	Michigan Server/Minimac3	HRC	1.1	All
	YATSS & STAGE & CATSS		[18],[19]	15770	Illumina Global Screening 650K	> 0.0001 in each cohort, > 0.001 in merged data	>0.95 in each cohort and in merged data	>10-10 (YATSS & CATSS) >10-15 (STAGE) > 10-10 in merged data	1) SNPs with significant MAF difference across cohorts (P-value for pairwise equality of MAF<0.001) 2) Allele mismatch with reference panel 3) ID mismatch with reference panel 4) Palindromic SNPs with MAF>0.4 5) Duplicated SNPID or BP position	0.95 (per chromosome)	1) Sex mismatch 2) Autosomal hetero/homozygosity outliers (plink F< -0.13 or F>0.13	TOPMed Server/Minimac4	TOPmed	r2	All
TexasTwins	N/A	Texas Twin Project	[20]	556	Infinium PsychArray-24 BeadChip	-	0.98	-	-	0.98	1) Sex mismatch 2) Restricted to self-reported non-Hispanic European ancestries	Michigan Server/Minimac3	HRC	1.1	All
TwinLife	N/A	The German Twin Family Panel	[21]	5535	Illumina Global Screening Array GSA+MD-24v3.0-Psych-24v1.1	0.001	0.98	10-6	-	0.98	1) Sex mismatch 2) Autosomal hetero/homozygosity outliers (plink F< -0.2 or F>0.2)	Eagle v.2.4.1 & Minimac4	1000 Genomes	p3v5	All
UKB	UKB1	UK Biobank (Full Release)	[22]	148661	UK BiLEVE Axiom Array and Applied Biosystems UK Biobank Axiom Array	See [22]				See [22]		IMPUTE4	HRC2.0 for primary imputation, UK10K + 1000 Genomes Phase 3 for remaining sites		All
	UKB2			148662
	UKB3			148662
WLS	N/A	Wisconsin Longitudinal Study	[23]	8523	Illumina HumanOmniExpress BeadChip	See [24]				See [24]		IMPUTE v2.3.2	1000 Genomes	p3v4	All
Notes: "Call rate" under SNP-level quality controls refers to the minimum percentage of successfully genotyped SNPs required for the SNP to be included in the set of genotyped SNPs. "Call rate" under subject-level exclusions is the minimum fraction of SNPs successfully genotyped in order for the subject to be retained in the sample. "HWE": Hardy-Weinberg equilibrium. "MAF": Minor allele frequency.
References
[1]		Bridges, E. C., Rayner, N. W., Mountford, H. S., Bates, T. C. & Luciano, M. Longitudinal Reading Measures and Genome Imputation in the National Child Development Study: Prospects for Future Reading Research. Twin Res. Hum. Genet. 26, 10–20 (2023)
[2]		Sullivan, A., Brown, M., Hamer, M. & Ploubidis, G. B. Cohort Profile Update: The 1970 British Cohort Study (BCS70). Int. J. Epidemiol. 52, e179–e186 (2023).
[3]		Connelly, R. & Platt, L. Cohort Profile: UK Millennium Cohort Study (MCS). Int. J. Epidemiol. 43, 1719–1725 (2014).
[4]		Harris, K. M., Halpern, C. T., Haberstick, B. C. & Smolen, A. The National Longitudinal Study of Adolescent Health (Add Health) sibling pairs data. Twin Res. Hum. Genet. 16, 391–8 (2013).
[5]		Boyd, A. et al. Cohort Profile: the ’children of the 90s’--the index offspring of the Avon Longitudinal Study of Parents and Children. Int. J. Epidemiol. 42, 111–127 (2013).
[6]		Fraser, A. et al. Cohort Profile: the Avon Longitudinal Study of Parents and Children: ALSPAC mothers cohort. Int. J. Epidemiol. 42, 97–110 (2013).
[7]		Northstone, K. et al. The Avon Longitudinal Study of Parents and Children (ALSPAC): an update on the enrolled sample of index children in 2019. Wellcome Open Res. 4, (2019).
[8]		Poulton, R., Moffitt, T. E. & Silva, P. A. The Dunedin Multidisciplinary Health and Development Study: overview of the first 40 years, with an eye to the future. Social Psychiatry and Psychiatric Epidemiology 50, 679–693 (2015).
[9]		Milani, L. et al. From Biobanking to Personalized Medicine: the journey of the Estonian Biobank. medRxiv doi:10.1101/2024.09.22.24313964.
[10]		Steptoe, A., Breeze, E., Banks, J. & Nazroo, J. Cohort Profile: The English Longitudinal Study of Ageing. Int. J. Epidemiol. 42, 1640–1648 (2013).
[11]		Moffitt, T. E. et al. Teen-aged mothers in contemporary Britain. J. Child Psychol. Psychiatry 43, 727–742 (2002).
[12]		Kurki, M. I. et al. FinnGen provides genetic insights from a well-phenotyped isolated population. Nat. 613, 508–518 (2023).
[13]		Milbourn, H. et al. Generation Scotland: an update on Scotland’s longitudinal family health study. BMJ Open 14, e084719 (2024).
[14]		Sonnega, A. et al. Cohort profile: the Health and Retirement Study (HRS). Int. J. Epidemiol. 43, 576–585 (2014)
[15]		Miller, M. B. et al. The Minnesota Center for Twin and Family Research genome-wide association study. Twin Res. Hum. Genet. 15, 767–774 (2012)
[16]		Ryff, C. D. et al. Midlife in the United States (MIDUS 2), 2004-2006. (2021) doi:10.3886/ICPSR04652.v8.
[17]		Koellinger, P. D. et al. Cohort profile: Genetic data in the German Socio-Economic Panel Innovation Sample (SOEP-G). PLoS One 18, e0294896 (2023).
[18]		Magnusson, P. K. E. et al. The Swedish Twin Registry: establishment of a biobank and other recent developments. Twin Res. Hum. Genet. 16, 317–329 (2013)
[19]		Zagai, U., Lichtenstein, P., Pedersen, N. L. & Magnusson, P. K. E. The Swedish Twin Registry: Content and Management as a Research Infrastructure. Twin Res. Hum. Genet. 1–9 (2019). doi:10.1017/thg.2019.99
[20]		Harden, K. P., Tucker-Drob, E. M. & Tackett, J. L. The Texas Twin Project. Twin Res. Hum. Genet. 16, 385–390 (2013).
[21]		Rohm, T. et al. Data from the German TwinLife Study: Genetic and Social Origins of Educational Predictors, Processes, and Outcomes. J. Open Psychol. Data 11, 1–15 (2023).
[22]		Bycroft, C. et al. The UK Biobank resource with deep phenotyping and genomic data. Nature 562, 203–209 (2018).
[23]		Herd, P., Carr, D. & Roan, C. Cohort profile: Wisconsin longitudinal study (WLS). Int. J. Epidemiol. 43, 34–41 (2014).
[24]		Wisconsin Longitudinal Study. Quality Control Report for Genotypic Data. Available at: https://www.ssc.wisc.edu/wlsresearch/documentation/GWAS/Herd_QC_report.pdf. (Accessed: 3rd March 2021)

## Sheet: 7. 23andMe GWAS
Supplementary Table 6: Details of release 2 23andMe GWAS
Phenotype			Phenotype Measure	Linear / Logistic	Covariates	N	Case prevalence	Citation
Anthropometric
	Height	Men	For each sex separately, height was regressed on age, age-squared and 5 PCs and the inverse normal transformed residuals were used as the phenotype data	Linear	Age, 5 PC's, platform dummies	1167917	N/A	[1]
		Women		Linear	Age, 5 PC's, platform dummies	1334345	N/A	[1]
Cognition and Education
	Alzheimer's		Alzheimer's case status, age 55 or older	Logistic	Sex, age, 5 PC's, platform dummies	363646	0.010469	[2]
	Educational Attainment		Approximate US education years	Linear	Sex, third degree polynomial in age and their interactions, 10 PC's, platform dummies	2272303	N/A	[3]
Health
	Hayfever		Phenotype is "Asthma with hayfever". Cases respond yes to both of the following questions, controls respond no to both - Have you ever had allergic rhinitis (stuffed or dripping nose caused by allergies)? - Have you ever been diagnosed by a doctor with asthma or bronchial asthma?”	Logistic	Sex, age, 5 PC's, platform dummies	15072	0.280653	[4]
Personality, Well-Being and Skills
	Musical Beat Synchronization		Can you clap in time with a musical beat? (yes/not sure/no)	Logistic	Sex, age, 5 PC's, platform dummies	606824	0.915686	[5]
Psychiatric
	Insomnia		Case if responded "yes" to any of the following - "Have you ever been diagnosed with, or treated for, insomnia?" - "Have you ever been diagnosed by a doctor with any of the following neurological conditions? - Sleep disturbance" - "Has a doctor ever told you that you have any of these conditions? - Insomnia (difficulty getting to sleep or staying asleep)" - "Do you routinely have trouble getting …	Logistic	Sex, age, 5 PC's, platform dummies	944460	0.305526	[6]
Substance use
	Age Smoking Initiation		Age started smoking, values from 8 to 30	Linear	Sex, age, 5 PC's, platform dummies	81419	N/A	[7]
	Smoking Cessation		Controls are former tobacco users, cases are current tobacco users. No restriction is made on the frequency of past or current smoking	Logistic	Sex, age, 5 PC's, platform dummies	244329	0.194279	[7]
Notes: "Linear/Logistic" refers to the type of regression used in the GWAS. "Covariates" refers to the covariates included in the GWAS. "Citation" is the original publication reporting the GWAS.
References
1. Yengo, L. et al. A saturated map of common genetic variants associated with human height. Nature 610, 704–712 (2022).
2. Wightman, D. P. et al. A genome-wide association study with 1,126,563 individuals identifies new risk loci for Alzheimer’s disease. Nat. Genet. 53, 1276–1282 (2021).
3. Okbay, A. et al. Polygenic prediction of educational attainment within and between families from genome-wide association analyses in 3 million individuals. Nat. Genet. 54, 437–449 (2022).
4. Ferreira, M. A. R. et al. Genome-wide association analysis identifies 11 risk variants associated with the asthma with hay fever phenotype. J. Allergy Clin. Immunol. 133, 1564–1571 (2014).
5. Niarchou, M. et al. Genome-wide association study of musical beat synchronization demonstrates high polygenicity. Nat. Hum. Behav. 6, 1292–1309 (2022)
6. Jansen, P. R. et al. Genome-wide analysis of insomnia in 1,331,010 individuals identifies new risk loci and functional pathways. Nat. Genet. 51, 394–403 (2019).
7. Liu, M. et al. Association studies of up to 1.2 million individuals yield new insights into the genetic etiology of tobacco and alcohol use. Nature Genetics 51, 237–244 (2019).

## Sheet: 8. SNP filtering
Supplementary Table 7: Description of SNP filtering for GWAS summary statistics
Dataset		Phenotype	#SNPs before QC	#1 Missing values	#2 Invalid values	#3 MAF, imputation accuracy, HWE P-value, call rate	#4 SE ratio	#5 Non-autosomal marker/ INDEL	#6 Invalid or duplicated position / Allele mismatch	#SNPs after QC	λGC	N
23andMe		Age Smoking Initiation	14716563	0	11753	4826876	35	1484665	793492	7599742	1.06588	81419
		Alzheimer's	28539896	0	6361	19609488	0	1257566	648095	7018386	1.03337	363646
		Educational Attainment	13297644	0	9463	4423113	0	1245589	649651	6969828	4.51205	2272216
		Hayfever	8058452	5	0	1654873	0	172231	199784	6031559	1.05552	15072
		Height - Men	13806898	0	9779	4722215	0	1282895	669517	7122492	4.38685	1334345
		Height - Women	13806898	0	9782	4719058	0	1283274	669778	7125006	3.9111	1167917
		Insomnia	12040512	0	0	3495647	1	926516	462808	7155540	1.61004	944460
		Musical Beat Synchronization	23639287	0	9778	14556461	0	1282421	669372	7121255	1.416	606824
		Smoking Cessation	24471236	0	11759	14577132	35	1485335	793851	7603124	1.15506	244329
UKB1		Age First Sex	9740198	0	0	164171	0	1107487	812628	7655912	1.25436	132308
		Age Smoking Initiation	9740198	0	0	167177	0	1107320	812440	7653261	1.04746	48319
		Allergy - Pollen	9740198	0	0	164504	0	1107468	812594	7655632	1.04746	148063
		Asthma	9740198	0	0	164532	0	1107477	812587	7655602	1.14736	148641
		Asthma/Eczema/Rhinitis	9740198	0	0	164662	0	1107473	812570	7655493	1.14736	142239
		Bipolar Disorder	9740198	0	0	168221	0	1107228	812352	7652397	1	30116
		Blood lipids - HDL cholesterol	9740198	0	0	164661	0	1107451	812595	7655491	1.31069	129761
		Blood lipids - LDL cholesterol	9740198	0	0	164468	0	1107480	812601	7655649	1.19994	141191
		Blood lipids - nonHDL cholesterol	9740198	0	0	164616	0	1107450	812597	7655535	1.19994	129735
		Blood lipids - Total cholesterol	9740198	0	0	164458	0	1107476	812596	7655668	1.19994	141429
		Blood lipids - Tryglycerids	9740198	0	0	164422	0	1107482	812602	7655692	1.25436	141331
		Blood Pressure - Diastolic	9740198	0	0	164446	0	1107467	812596	7655689	1.36903	147811
		Blood Pressure - Pulse	9740198	0	0	164445	0	1107468	812595	7655690	1.31069	147810
		Blood Pressure - Systolic	9740198	0	0	164445	0	1107468	812595	7655690	1.36903	147810
		Breast cancer	9740198	0	0	164806	0	1107455	812601	7655336	1.04746	81905
		Childlessness - Men	9740198	0	0	167135	0	1107258	812402	7653403	1.04746	48062
		Childlessness - Women	9740198	0	0	165025	0	1107420	812580	7655173	1.04746	76188
		COPD	9740198	0	0	164541	0	1107473	812593	7655591	1.04746	148411
		Coronary Artery Disease	9740198	0	0	164518	0	1107466	812589	7655625	1.09656	148461
		Eczema	9740198	0	0	165496	0	1107391	812563	7654748	1	106333
		Educational Attainment	9740198	0	0	164524	0	1107470	812595	7655609	1.42946	147220
		Hayfever	9740198	0	0	164821	0	1107430	812592	7655355	1.14736	129696
		Inflammatory Bowel Disease	9740198	0	0	164497	0	1107465	812607	7655629	1.04746	140201
		Insomnia	9740198	0	0	164492	0	1107476	812594	7655636	1.14736	148573
		Migraine	9740198	0	0	164792	0	1107460	812597	7655349	1.09656	141942
		Nearsightedness	9740198	0	0	165228	0	1107416	812557	7654997	1.14736	73639
		Number Ever Born - Men	9740198	0	0	167135	0	1107258	812402	7653403	1.04746	48062
		Number Ever Born - Women	9740198	0	0	165025	0	1107420	812580	7655173	1.09656	76188
		Prostate Cancer	9740198	0	0	165914	0	1107338	812482	7654464	1.04746	66736
		Schziophrenia	9740198	0	0	168591	0	1107185	812332	7652090	1.04746	29386
		Smoking Cessation	9740198	0	0	165705	0	1107325	812503	7654665	1.04746	67331
		Type-II Diabetes	9740198	0	0	164461	0	1107466	812582	7655689	1.14736	148354
UKB2		Age First Sex	9740198	0	0	161128	0	1107769	812844	7658457	1.19994	129868
		Age Smoking Initiation	9740198	0	0	163871	0	1107511	812642	7656174	1	48912
		Allergy - Pollen	9740198	0	0	160833	0	1107764	812871	7658730	1.04746	148045
		Asthma	9740198	0	0	160895	0	1107766	812853	7658684	1.09656	148630
		Asthma/Eczema/Rhinitis	9740198	0	0	161011	0	1107758	812815	7658614	1.14736	142562
		Bipolar Disorder	9740198	0	0	166579	0	1107335	812445	7653839	1.04746	23840
		Blood lipids - HDL cholesterol	9740198	0	0	160773	0	1107801	812865	7658759	1.31069	129398
		Blood lipids - LDL cholesterol	9740198	0	0	160983	0	1107782	812839	7658594	1.19994	140895
		Blood lipids - nonHDL cholesterol	9740198	0	0	160781	0	1107800	812869	7658748	1.19994	129376
		Blood lipids - Total cholesterol	9740198	0	0	160931	0	1107778	812838	7658651	1.19994	141148
		Blood lipids - Tryglycerids	9740198	0	0	160958	0	1107774	812835	7658631	1.25436	141035
		Blood Pressure - Diastolic	9740198	0	0	160924	0	1107746	812859	7658669	1.31069	147629
		Blood Pressure - Pulse	9740198	0	0	160924	0	1107745	812860	7658669	1.31069	147628
		Blood Pressure - Systolic	9740198	0	0	160924	0	1107745	812860	7658669	1.31069	147628
		Breast cancer	9740198	0	0	161756	0	1107715	812838	7657889	1.04746	80031
		Childlessness - Men	9740198	0	0	164152	0	1107486	812665	7655895	1.04746	44425
		Childlessness - Women	9740198	0	0	162282	0	1107656	812842	7657418	1.04746	72953
		COPD	9740198	0	0	160944	0	1107758	812854	7658642	1.09656	148397
		Coronary Artery Disease	9740198	0	0	160917	0	1107753	812854	7658674	1.09656	148438
		Eczema	9740198	0	0	161681	0	1107745	812815	7657957	1	108183
		Educational Attainment	9740198	0	0	161080	0	1107762	812860	7658496	1.42946	146982
		Hayfever	9740198	0	0	161430	0	1107738	812823	7658207	1.09656	128878
		Inflammatory Bowel Disease	9740198	0	0	161047	0	1107761	812840	7658550	1.04746	140286
		Insomnia	9740198	0	0	160885	0	1107768	812852	7658693	1.09656	148527
		Migraine	9740198	0	0	160904	0	1107776	812884	7658634	1.09656	141873
		Nearsightedness	9740198	0	0	162899	0	1107622	812830	7656847	1.09656	54128
		Number Ever Born - Men	9740198	0	0	164152	0	1107486	812665	7655895	1.04746	44425
		Number Ever Born - Women	9740198	0	0	162282	0	1107656	812842	7657418	1.04746	72953
		Prostate Cancer	9740198	0	0	162343	0	1107667	812770	7657418	1.04746	68599
		Schziophrenia	9740198	0	0	166779	0	1107315	812391	7653713	1	23047
		Smoking Cessation	9740198	0	0	162024	0	1107665	812782	7657727	1.04746	68869
		Type-II Diabetes	9740198	0	0	160875	0	1107767	812856	7658700	1.14736	148280
UKB3		Age First Sex	9740198	0	0	160618	0	1107739	812913	7658928	1.19994	130255
		Age Smoking Initiation	9740198	0	0	163092	0	1107543	812718	7656845	1.04746	48487
		Allergy - Pollen	9740198	0	0	160663	0	1107733	812906	7658896	1	148047
		Asthma	9740198	0	0	160617	0	1107736	812900	7658945	1.09656	148638
		Asthma/Eczema/Rhinitis	9740198	0	0	160778	0	1107726	812866	7658828	1.14736	142597
		Bipolar Disorder	9740198	0	0	166889	0	1107325	812359	7653625	1	24146
		Blood lipids - HDL cholesterol	9740198	0	0	161014	0	1107717	812882	7658585	1.25436	129452
		Blood lipids - LDL cholesterol	9740198	0	0	160885	0	1107729	812881	7658703	1.19994	140841
		Blood lipids - nonHDL cholesterol	9740198	0	0	161026	0	1107716	812884	7658572	1.19994	129430
		Blood lipids - Total cholesterol	9740198	0	0	160884	0	1107731	812891	7658692	1.19994	141090
		Blood lipids - Tryglycerids	9740198	0	0	160969	0	1107729	812878	7658622	1.25436	140964
		Blood Pressure - Diastolic	9740198	0	0	160632	0	1107745	812905	7658916	1.31069	147585
		Blood Pressure - Pulse	9740198	0	0	160632	0	1107745	812905	7658916	1.31069	147585
		Blood Pressure - Systolic	9740198	0	0	160632	0	1107745	812905	7658916	1.31069	147585
		Breast cancer	9740198	0	0	161078	0	1107686	812872	7658562	1.04746	80007
		Childlessness - Men	9740198	0	0	164876	0	1107380	812631	7655311	1.04746	44448
		Childlessness - Women	9740198	0	0	161388	0	1107664	812863	7658283	1.04746	72782
		COPD	9740198	0	0	160600	0	1107736	812913	7658949	1.09656	148381
		Coronary Artery Disease	9740198	0	0	160598	0	1107739	812900	7658961	1.09656	148469
		Eczema	9740198	0	0	161688	0	1107679	812814	7658017	1	107763
		Educational Attainment	9740198	0	0	160609	0	1107729	812908	7658952	1.36903	146983
		Hayfever	9740198	0	0	161121	0	1107688	812834	7658555	1.09656	128749
		Inflammatory Bowel Disease	9740198	0	0	160519	0	1107722	812920	7659037	1.04746	140239
		Insomnia	9740198	0	0	160665	0	1107735	812899	7658899	1.09656	148531
		Migraine	9740198	0	0	160527	0	1107755	812927	7658989	1.04746	141839
		Nearsightedness	9740198	0	0	161374	0	1107717	812857	7658250	1.09656	54646
		Number Ever Born - Men	9740198	0	0	164876	0	1107380	812631	7655311	1	44448
		Number Ever Born - Women	9740198	0	0	161388	0	1107664	812863	7658283	1.04746	72782
		Prostate Cancer	9740198	0	0	163087	0	1107527	812807	7656777	1.04746	68631
		Schziophrenia	9740198	0	0	166792	0	1107302	812370	7653734	1	23366
		Smoking Cessation	9740198	0	0	161377	0	1107688	812868	7658265	1.04746	68808
		Type-II Diabetes	9740198	0	0	160605	0	1107747	812901	7658945	1.14736	148312
Mills1		Age First Birth	9744772	510409	0	1369610	12679	210606	0	7641468	1.39295	542901
Mills1		Age First Sex	13823837	0	0	5779975	104698	231190	0	7707974	1.69409	397338
Furberg2		Age Smoking Initiation	2434616	0	0	0	41174	0	44	2393398	1.05278	24114
Liu3 excl 23andMe		Age Smoking Initiation	11983806	0	0	4224276	42899	0	3	7716628	1.15254	262990
Liu3 excl 23andMe & UKB		Age Smoking Initiation	13839364	500871	0	5618141	12943	0	3	7707406	1.06201	138400
Saunders4 excl 23andMe		Age Smoking Initiation	11182011	0	0	3479448	5543	0	276	7696744	1.24074	323386
Saunders4 excl 23andMe & UKB		Age Smoking Initiation	11277744	0	0	3575145	3215	0	291	7699093	1.0983	175835
Walters5		Alcohol Use Disorder	7490439	0	0	181924	0	0	0	7308515	1.05569	46568
Bellenguez6		Alzheimer's	21058984	0	0	12472409	970	487788	418953	7678864	1.17395	487511
Wightman7 excl 23andMe		Alzheimer's	10700844	0	0	2852031	0	0	0	7848813	1.07069	762917
Duncan8		Anorexia Nervosa	10641224	2363900	0	905671	27185	0	6	7344462	1.06006	14477
Watson9		Anorexia Nervosa	8219102	1563763	0	44559	1858	0	0	6608922	1.22582	72517
Tsuo10 (all ancestry)		Asthma	39135898	0	1821	25099320	104880	1684709	5150696	7094472	1.37082	1800785
Tsuo10 (all ancestry) excl UKB		Asthma	37327142	0	1304	21349947	353759	1564082	5504695	8553355	1.22148	1369372
Demontis11		Attention Deficit Hyperactivity Disorder (ADHD)	6774224	0	0	0	162	0	2	6774060	1.32162	225534
Grove12		Autism Spectrum Disorder	7224089	0	0	147554	2051	0	0	7074484	1.13809	46350
Mullins13		Bipolar Disorder	7608183	0	0	145777	818	0	6268	7455320	1.38334	413466
Stahl14		Bipolar Disorder	13413244	0	0	4885922	3927	712763	516130	7294502	1.26882	51710
Graham15		Blood lipids - HDL cholesterol	46150908	0	12221	36121290	11425	1312795	1019383	7673794	1.912	1244580
Graham15 excl UKB		Blood lipids - HDL cholesterol	36588494	0	12221	26637322	15070	1262619	1004697	7656565	1.78882	888227
Sinnott-Armstrong16		Blood lipids - HDL cholesterol	8860995	1726698	0	140360	3117	0	0	6990820	1.59099	325634
Graham15		Blood lipids - LDL cholesterol	47006483	0	12241	35989225	11325	2295053	1020557	7678082	1.44801	1231289
Graham15 excl UKB		Blood lipids - LDL cholesterol	36864579	0	12241	25924272	15655	2244789	1005205	7662417	1.38694	842660
Sinnott-Armstrong16		Blood lipids - LDL cholesterol	8860985	1726696	0	140358	3133	0	0	6990798	1.36429	355197
Graham15		Blood lipids - nonHDL cholesterol	39962894	0	11822	30079942	8636	1226394	960577	7675523	1.44181	926571
Graham15 excl UKB		Blood lipids - nonHDL cholesterol	29887578	0	11822	20048664	8292	1214198	949128	7655474	1.39295	570286
Sinnott-Armstrong16		Blood lipids - Total cholesterol	46513217	0	12205	36484327	11281	1312506	1018814	7674084	1.52424	1320016
Graham15 excl UKB		Blood lipids - Total cholesterol	36871085	0	12205	26924046	14816	1261769	1003462	7654787	1.46049	930672
Sinnott-Armstrong16		Blood lipids - Total cholesterol	8860979	1726694	0	140359	3131	0	0	6990795	1.38934	355858
Graham15		Blood lipids - Tryglycerids	47196261	0	12229	36175862	11343	2295183	1024507	7677137	1.78136	1253277
Graham15 excl UKB		Blood lipids - Tryglycerids	37005452	0	12229	26058778	15524	2244854	1013307	7660760	1.67992	864240
Sinnott-Armstrong16		Blood lipids - Tryglycerids	8860988	1726699	0	140361	3140	0	0	6990788	1.53465	355577
Evangelou17		Blood Pressure - Diastolic	7160657	0	0	1223	1	0	16	7159417	1.87347	757601
Evangelou17 excl UKB		Blood Pressure - Diastolic	7476460	0	0	175839	18275	0	2225	7280121	1.38694	299024
Evangelou17		Blood Pressure - Pulse	7088842	0	0	1111	1	0	16	7087714	1.77246	745820
Evangelou17 excl UKB		Blood Pressure - Pulse	7359508	0	0	156204	13164	0	2006	7188134	1.31414	287245
Evangelou17		Blood Pressure - Systolic	7088121	0	0	1109	1	0	16	7086995	1.91597	745820
Evangelou17 excl UKB		Blood Pressure - Systolic	7371711	0	0	156138	10353	0	1839	7203381	1.40504	287245
Zhang18		Breast Cancer	10760767	0	10120	1456899	301	1224386	738298	7330763	1.32343	247173
Mathieson19		Childlessness	13602788	0	0	4917576	16	541939	484547	7658710	1.25436	450082
Liu3 excl 23andMe & UKB		Cigarettes per Day	13863069	494044	0	5647057	13453	0	3	7708512	1.09157	143210
Saunders4 excl 23andMe		Cigarettes per Day	11209716	0	0	3506858	4894	0	269	7697695	1.35132	326497
Saunders4 excl 23andMe & UKB		Cigarettes per Day	11307581	0	0	3604699	2868	0	274	7699740	1.19316	183196
Tsuo10 (all ancestry)		COPD	35918070	0	3184	21484620	21689	1745207	5420265	7243105	1.19887	1392366
Tsuo10 (all ancestry) excl UKB		COPD	34228983	0	2968	17357819	27095	1728304	6144969	8967828	1.1096	992289
Aragam20		Coronary Artery Disease	20073070	0	0	9022304	162688	1028693	854791	9004594	1.27778	613027
Nelson21		Coronary Artery Disease	9026567	0	0	429963	620	547800	460356	7587828	1.00645	336924
Nikpay22		Coronary Artery Disease	9455778	0	0	1100948	3576	697125	466811	7187318	1.01698	184305
Liu3 excl 23andMe & UKB		Drinks per Week	14093663	819992	0	5598641	13839	0	3	7661188	1.11162	226223
Saunders4 excl 23andMe		Drinks per Week	10974404	0	0	3276513	7750	0	254	7689887	1.5113	666978
Saunders4 excl 23andMe & UKB		Drinks per Week	11091044	0	0	3393078	2576	0	265	7695125	1.18262	304322
Okbay23 excl 23andMe		Educational Attainment	11021417	0	0	3323521	0	0	1	7697895	2.00206	765283
Okbay23 excl 23andMe & AH		Educational Attainment	11451415	0	0	3331445	0	0	375458	7744512	1.98636	759593
Okbay23 excl 23andMe & ALSPAC		Educational Attainment	11445745	0	0	3331260	0	0	370081	7744404	1.99048	762406
Okbay23 excl 23andMe & EBB		Educational Attainment	11413638	0	0	3328115	0	0	348404	7737119	1.96997	728652
Okbay23 excl 23andMe & ELSA		Educational Attainment	11451030	0	0	3331197	0	0	375455	7744378	1.98389	759218
Okbay23 excl 23andMe & FinnGen		Educational Attainment	11004609	0	0	3333567	0	0	1	7671041	1.98554	750621
Okbay23 excl 23andMe & GS		Educational Attainment	11448820	0	0	3332751	0	0	375428	7740641	1.99461	749342
Okbay23 excl 23andMe & HRS		Educational Attainment	11427449	0	0	3330452	0	0	355025	7741972	1.98883	755320
Okbay23 excl 23andMe & MCS		Educational Attainment	11448604	0	0	3331489	0	0	372792	7744323	1.98801	761464
Okbay23 excl 23andMe & NCDS		Educational Attainment	11445615	0	0	3331384	0	0	370075	7744156	1.99131	762479
Okbay23 excl 23andMe & STR		Educational Attainment	11004413	0	0	3324726	0	0	1	7679686	1.99543	750897
Okbay23 excl 23andMe & UKB		Educational Attainment	8142858	0	0	517529	0	0	375459	7249870	1.39114	324162
Okbay23 excl 23andMe & WLS		Educational Attainment	11450583	0	0	3330970	0	0	375456	7744157	1.99048	757494
Liu3 excl 23andMe & UKB		Ever Smoker	13933175	727468	0	5503097	15917	0	3	7686690	1.19994	249171
Saunders4 excl 23andMe		Ever Smoker	11089712	0	0	3387222	8038	0	72	7694380	1.78136	805431
Saunders4 excl 23andMe & UKB		Ever Smoker	11279924	0	0	3577405	3509	0	65	7698945	1.39513	357235
Yengo24 excl 23andMe		Height	1373020	412	0	191454	10	0	503	1180641	5.20617	1597374
Yengo24 excl 23andMe & UKB		Height	1372528	0	0	190268	11	0	510	1181739	3.79826	1177601
Liu25		Inflammatory Bowel Disease	11555662	0	0	3233698	4022	699588	467581	7150773	1.15513	34652
Jansen26 excl 23andMe		Insomnia	10862567	0	0	3648471	7	14448	88	7199553	1.25768	386533
Gormley27		Migraine	8935979	0	0	0	1335	966642	575338	7392664	1.11574	201198
Hautakangas28		Migraine	10546478	0	0	36	19621	1434006	1003954	8088861	1.20295	588413
Hysi29		Nearsightedness	8754054	0	0	1113664	0	48566	61175	7530649	1.62771	260974
Mathieson19		Number Ever Born	15360087	0	0	6485166	63362	548133	489952	7773474	1.29927	785604
Wang30		Physical Activity	22586718	0	1	11929978	80415	1429741	1207464	7939119	1.26157	608595
Schumacher31		Prostate Cancer	20370946	0	11783	10547347	25492	1374381	810680	7601263	1.20476	140306
Trubetskoy32		Schizophrenia	7585077	1	0	269312	1	0	6138	7309625	1.67147	161405
Furberg2		Smoking Cessation	2434616	0	0	0	40775	0	44	2393797	1.05278	41278
Liu3 excl 23andMe		Smoking Cessation	12197133	0	0	4391214	41934	0	3	7763982	1.11162	312821
Liu3 excl 23andMe & UKB		Smoking Cessation	14310198	643985	0	5931530	8899	0	3	7725781	1.04264	143851
Saunders4 excl 23andMe		Smoking Cessation	11184822	0	2	3482065	6079	0	61	7696615	1.28228	388313
Saunders4 excl 23andMe & UKB		Smoking Cessation	11307667	0	3	3604897	2861	0	73	7699833	1.1422	188701
Okbay33 1kG excl 23andMe & UKB		Subjective Well-Being	7402823	0	0	269086	0	0	341892	6791845	1.06592	95886.1
Okbay33 1kG excl 23andMe & UKB & ALSPAC		Subjective Well-Being	7237422	0	0	199913	0	0	334301	6703208	1.06445	90232.1
Okbay33 1kG excl 23andMe & UKB & FinnGen		Subjective Well-Being	7261505	0	0	249700	0	0	332296	6679509	1.06494	88878.1
Okbay33 1kG excl 23andMe & UKB & HRS		Subjective Well-Being	7089080	0	0	165106	0	0	325831	6598143	1.05617	85944.1
Okbay33 1kG excl 23andMe & UKB & MCTFR		Subjective Well-Being	7353696	0	0	267240	0	0	338150	6748306	1.06006	91848.1
Okbay33 1kG excl 23andMe & UKB & STR		Subjective Well-Being	7088360	0	0	164413	0	0	328523	6595424	1.05472	81839.1
Mahajan34		Type-II Diabetes	10454875	0	0	2563608	89418	0	100	7801749	1.37558	933970
Scott35		Type-II Diabetes	12056346	1959550	0	2299357	18501	0	0	7778938	1.09656	158186
Notes: "Missing values" and "Invalid values" refer to missing/invalid values for effect allele, other allele, effect allele frequency, Beta, SE, P-value or imputation accuracy. "MAF" refers to minor allele frequency. "HWE" refers to Hardy-Weinberg Equilibrium exact test. "SE ratio" refers to the ratio of reported standard errors to predicted standard errors. "λGC" is the genomic inflation factor.…
References
1	Mills, M. C. et al. Identification of 371 genetic variants for age at first sex and birth linked to externalising behaviour. Nat. Hum. Behav. 5, 1717–1730 (2021).
2	Furberg, H. et al. Genome-wide meta-analyses identify multiple loci associated with smoking behavior. Nat. Genet. 42, 441–447 (2010).
3	Liu, M. et al. Association studies of up to 1.2 million individuals yield new insights into the genetic etiology of tobacco and alcohol use. Nat. Genet. 51, 237–244 (2019).
4	Saunders, G. R. B. et al. Genetic diversity fuels gene discovery for tobacco and alcohol use. Nat. 2022 6127941 612, 720–724 (2022).
5	Walters, R. K. et al. Transancestral GWAS of alcohol dependence reveals common genetic underpinnings with psychiatric disorders. Nat. Neurosci. 21, 1656–1669 (2018).
6	Bellenguez, C. et al. New insights into the genetic etiology of Alzheimer’s disease and related dementias. Nat. Genet. 54, 412–436 (2022).
7	Wightman, D. P. et al. A genome-wide association study with 1,126,563 individuals identifies new risk loci for Alzheimer’s disease. Nat. Genet. 2021 539 53, 1276–1282 (2021).
8	Duncan, L. et al. Significant Locus and Metabolic Genetic Correlations Revealed in Genome-Wide Association Study of Anorexia Nervosa. Am. J. Psychiatry 174, 850–858 (2017).
9	Watson, H. J. et al. Genome-wide association study identifies eight risk loci and implicates metabo-psychiatric origins for anorexia nervosa. Nat. Genet. 51, 1207–1214 (2019).
10	Tsuo, K. et al. Multi-ancestry meta-analysis of asthma identifies novel associations and highlights the value of increased power and diversity. Cell Genomics 2, (2022).
11	Demontis, D. et al. Genome-wide analyses of ADHD identify 27 risk loci, refine the genetic architecture and implicate several cognitive domains. Nat. Genet. 55, 198–208 (2023).
12	Grove, J. et al. Identification of common genetic risk variants for autism spectrum disorder. Nat. Genet. (2019) doi:10.1038/s41588-019-0344-8.
13	Mullins, N. et al. Genome-wide association study of more than 40,000 bipolar disorder cases provides new insights into the underlying biology. Nat. Genet. 2021 536 53, 817–829 (2021).
14	Stahl, E. A. et al. Genome-wide association study meta-analysis identifies seven new rheumatoid arthritis risk loci. Nat. Genet. 42, 508–514 (2010).
15	Graham, S. E. et al. The power of genetic diversity in genome-wide association studies of lipids. Nature 600, 675–679 (2021).
16	Sinnott-Armstrong, N. et al. Genetics of 35 blood and urine biomarkers in the UK Biobank. Nat. Genet. 2021 532 53, 185–194 (2021).
17	Evangelou, E. et al. Genetic analysis of over 1 million people identifies 535 new loci associated with blood pressure traits. Nat. Genet. 2018 5010 50, 1412–1425 (2018).
18	Zhang, H. et al. Genome-wide association study identifies 32 novel breast cancer susceptibility loci from overall and subtype-specific analyses. Nat. Genet. 2020 526 52, 572–581 (2020).
19	Mathieson, I. et al. Genome-wide analysis identifies genetic effects on reproductive success and ongoing natural selection at the FADS locus. Nat. Hum. Behav. 7, 790–801 (2023).
20	Aragam, K. G. et al. Discovery and systematic characterization of risk variants and genes for coronary artery disease in over a million participants. Nat. Genet. 54, 1803–1815 (2022).
21	Nelson, C. P. et al. Association analyses based on false discovery rate implicate new loci for coronary artery disease. Nat. Genet. (2017).
22	Nikpay, M. et al. A comprehensive 1000 Genomes-based genome-wide association meta-analysis of coronary artery disease. Nat. Genet. 47, 1121–1130 (2015).
23	Okbay, A. et al. Polygenic prediction of educational attainment within and between families from genome-wide association analyses in 3 million individuals. Nat. Genet. 54, 437–449 (2022).
24	Yengo, L. et al. A saturated map of common genetic variants associated with human height. Nat. 2022 6107933 610, 704–712 (2022).
25	Liu, J. Z. et al. Association analyses identify 38 susceptibility loci for inflammatory bowel disease and highlight shared genetic risk across populations. Nat. Genet. 47, 979–986 (2015).
26	Jansen, P. R. et al. Genome-wide analysis of insomnia in 1,331,010 individuals identifies new risk loci and functional pathways. Nat. Genet. 51, 394–403 (2019).
27	Gormley, P. et al. Meta-analysis of 375,000 individuals identifies 38 susceptibility loci for migraine. Nat. Genet. 48, 856–866 (2016).
28	Hautakangas, H. et al. Genome-wide analysis of 102,084 migraine cases identifies 123 risk loci and subtype-specific risk alleles. Nat. Genet. 2022 542 54, 152–160 (2022).
29	Hysi, P. G. et al. Meta-analysis of 542,934 subjects of European ancestry identifies new genes and mechanisms predisposing to refractive error and myopia. Nat. Genet. 52, 401–407 (2020).
30	Wang, Z. et al. Genome-wide association analyses of physical activity and sedentary behavior provide insights into underlying mechanisms and roles in disease prevention. Nat. Genet. 54, 1332–1344 (2022).
31	Schumacher, F. R. et al. Association analyses of more than 140,000 men identify 63 new prostate cancer susceptibility loci. Nat. Genet. 50, 928–936 (2018).
32	Trubetskoy, V. et al. Mapping genomic loci implicates genes and synaptic biology in schizophrenia. Nat. 2022 6047906 604, 502–508 (2022).
33	Okbay, A. et al. Genetic variants associated with subjective well-being, depressive symptoms, and neuroticism identified through genome-wide analyses. Nat. Genet. 48, 624–633 (2016).
34	Mahajan, A. et al. Multi-ancestry genetic study of type 2 diabetes highlights the power of diverse populations for discovery and translation. Nat. Genet. 2022 545 54, 560–572 (2022).
35	Scott, R. A. et al. An Expanded Genome-Wide Association Study of Type 2 Diabetes in Europeans. Diabetes 66, 2888–2902 (2017).

## Sheet: 9. Within-pheno h2
Supplementary Table 8: LD score regression results for the GWAS included in the meta-analyses for each phenotype
		GWAS	# SNPs	h2	SE(h2)	λGC	Mean χ2	Intercept	SE(Intercept)
Anthropometric
	Body Mass Index (BMI)	Locke	1043169	0.13	0.0056	1.0772	1.2652	0.6741	0.0079
		UKB1	1169142	0.2335	0.0092	1.5585	1.7368	1.0591	0.0115
		UKB2	1169237	0.2364	0.0097	1.5585	1.7221	1.039	0.0104
		UKB3	1169256	0.2478	0.0095	1.5585	1.7505	1.0313	0.0108
	Height	23andMe - female	1081832	0.4183	0.0209	5.227	13.8604	1.9078	0.2029
		23andMe - male	1081891	0.4166	0.0208	4.6092	12.0066	1.7174	0.1753
		UKB1	1169127	0.4903	0.0243	1.8405	2.8052	1.2742	0.0206
		UKB2	1169237	0.4796	0.0247	1.7648	2.7226	1.2001	0.0216
		UKB3	1169247	0.4875	0.0225	1.8405	2.7259	1.2059	0.0222
		Wood	1042620	0.3154	0.0144	2.0007	2.9856	1.3291	0.0195
		Yengo	1046661	0.4149	0.022	5.3087	15.6254	2.1128	0.207
		Yengo excl UKB	1069628	0.3272	0.0172	3.8013	9.3013	1.7946	0.1231
Biomarkers
	Blood lipids - HDL cholesterol	Graham	1178017	0.1502	0.0315	2.1372	4.4678	1.3499	0.1214
		Graham excl UKB	1180073	0.1544	0.0305	1.9881	3.7	1.3427	0.1114
		SinnottArmstrong	1024883	0.1915	0.0174	1.7218	2.5308	1.2682	0.1036
		UKB1	1168689	0.2219	0.0258	1.3546	1.7036	1.1409	0.0519
		UKB2	1168829	0.2327	0.0281	1.3581	1.7074	1.1259	0.0481
		UKB3	1168822	0.222	0.0283	1.3512	1.6894	1.1298	0.0495
	Blood lipids - LDL cholesterol	Graham	1177123	0.123	0.0318	1.5437	3.4649	1.198	0.1141
		Graham excl UKB	1180054	0.1156	0.0229	1.4745	2.7758	1.1879	0.1022
		SinnottArmstrong	1024886	0.1523	0.0187	1.4069	2.2661	1.1496	0.0984
		UKB1	1168694	0.1824	0.0277	1.2498	1.6186	1.1234	0.0827
		UKB2	1168809	0.174	0.0263	1.2234	1.5853	1.116	0.0852
		UKB3	1168815	0.1666	0.0285	1.2168	1.5782	1.1235	0.0806
	Blood lipids - nonHDL cholesterol	Graham	1172719	0.1224	0.0217	1.5327	3.1237	1.2079	0.094
		Graham excl UKB	1178954	0.125	0.0166	1.4745	2.4826	1.2102	0.0818
		UKB1	1168689	0.1839	0.0335	1.2531	1.5985	1.1284	0.0811
		UKB2	1168828	0.1711	0.0336	1.2267	1.5711	1.1345	0.0871
		UKB3	1168822	0.1593	0.0348	1.2168	1.5518	1.1419	0.0843
	Blood lipids - Total cholesterol	Graham	1177436	0.1205	0.0209	1.984	4.2581	1.1412	0.1573
		Graham excl UKB	1180144	0.1367	0.0245	1.8485	3.556	1.1234	0.1258
		SinnottArmstrong	1024891	0.1863	0.0278	1.641	2.4923	1.0754	0.0469
		UKB1	1168698	0.2198	0.0365	1.3135	1.6699	1.031	0.0302
		UKB2	1168814	0.2149	0.0355	1.3068	1.6546	1.0372	0.0293
		UKB3	1168814	0.2124	0.0355	1.3068	1.648	1.0332	0.0299
	Blood lipids - Tryglycerids	Graham	1177153	0.0941	0.0088	1.984	3.5515	1.2015	0.0979
		Graham excl UKB	1179937	0.11	0.0118	1.8485	3.1024	1.1703	0.0805
		SinnottArmstrong	1024848	0.1672	0.0188	1.6334	2.3993	1.1103	0.0506
		UKB1	1168697	0.219	0.036	1.3101	1.6686	1.0317	0.0301
		UKB2	1168814	0.2149	0.0355	1.3101	1.6547	1.0374	0.0293
		UKB3	1168813	0.2116	0.0351	1.3101	1.6468	1.0339	0.0299
	Blood Pressure - Diastolic	Evangelou	1152930	0.1363	0.0065	2.0641	3.2161	1.095	0.0364
		Evangelou excl UKB	1079712	0.1072	0.0069	1.4745	1.7422	1.0658	0.0191
		UKB1	1168697	0.1965	0.0115	1.4281	1.6643	1.0596	0.0144
		UKB2	1168807	0.1782	0.0095	1.4281	1.5892	1.0534	0.0122
		UKB3	1168823	0.1883	0.0095	1.4281	1.6025	1.0397	0.0116
	Blood Pressure - Pulse	Evangelou	1151628	0.1233	0.0052	1.9259	2.84	1.0228	0.0291
		Evangelou excl UKB	1072641	0.0857	0.0054	1.3789	1.5463	1.0472	0.0161
		UKB1	1168697	0.1771	0.0101	1.3685	1.5916	1.0624	0.0141
		UKB2	1168807	0.1816	0.0099	1.3685	1.5552	1.0207	0.0125
		UKB3	1168823	0.1771	0.0093	1.3685	1.5516	1.0335	0.0133
	Blood Pressure - Systolic	Evangelou	1151605	0.1405	0.0061	2.1069	3.1776	1.0773	0.0337
		Evangelou excl UKB	1072645	0.1149	0.0071	1.489	1.7487	1.0689	0.0193
		UKB1	1168697	0.1859	0.0112	1.4281	1.6456	1.0776	0.0144
		UKB2	1168807	0.1836	0.0094	1.4281	1.5867	1.0419	0.0117
		UKB3	1168823	0.1893	0.009	1.4281	1.5994	1.041	0.0115
Cognition and Education
	Alzheimer's	23andMe	935145	-2.8008e-05	0.0048	1.0345	1.0484	1.0486	0.0404
		Bellenguez	1170090	0.0193	0.0033	1.2038	1.2774	1.0891	0.0276
		Kunkle	1183032	0.0488	0.0225	1.0926	1.1189	1.0571	0.0343
		Wightman	1133014	0.0057	0.0047	1.0988	1.1817	1.0934	0.0878
	Childhood Reading	23andMe	1132843	0.0703	0.0043	1.2398	1.2705	1.0231	0.0082
	Cognitive Performance	Trampush	1105907	0.1313	0.0151	1.1238	1.14	1.0483	0.007
		UKB1	1169114	0.234	0.012	1.3101	1.4108	1.026	0.0086
		UKB2	1169228	0.2142	0.0109	1.2531	1.3154	1.013	0.0084
		UKB3	1169329	0.2192	0.0129	1.2531	1.3353	1.0089	0.0084
	Educational Attainment	23andMe	1061576	0.1392	0.0037	5.3497	8.033	1.6332	0.0492
		Okbay excl 23andMe & AddHealth	1144154	0.1379	0.0037	2.2961	3.0481	1	0.0186
		Okbay excl 23andMe & ALSPAC	1144148	0.138	0.0037	2.3006	3.0551	1	0.0185
		Okbay excl 23andMe & ELSA	1144150	0.1384	0.0037	2.2961	3.0537	0.9999	0.0183
		Okbay excl 23andMe & EstBB	1143935	0.1408	0.0038	2.2692	3.0028	0.9999	0.0184
		Okbay excl 23andMe & FinnGen	1143891	0.1382	0.0037	2.2781	3.0289	0.9998	0.0184
		Okbay excl 23andMe & GS	1144187	0.1411	0.0037	2.3096	3.0661	0.9999	0.0185
		Okbay excl 23andMe & HRS	1144151	0.1387	0.0037	2.2961	3.0458	1	0.0184
		Okbay excl 23andMe & MCTFR	1144148	0.1378	0.0037	2.3006	3.0495	1	0.0184
		Okbay excl 23andMe & NCDS	1144126	0.1384	0.0037	2.3006	3.0609	1	0.0186
		Okbay excl 23andMe & STR	1144141	0.1396	0.0037	2.2916	3.0477	1	0.0184
		Okbay excl 23andMe & UKB	1169121	0.1013	0.0038	1.4781	1.6279	0.9999	0.0098
		Okbay excl 23andMe & WLS	1144154	0.1388	0.0037	2.3006	3.0523	0.9999	0.0187
		OkbayExcl23andMe	1144131	0.1383	0.0037	2.3051	3.0671	1	0.0185
		UKB1	1168697	0.1872	0.0074	1.5585	1.6337	1.0905	0.0092
		UKB2	1168805	0.2095	0.0082	1.4926	1.6304	1.0303	0.0103
		UKB3	1168830	0.1995	0.0083	1.4926	1.6108	1.0328	0.0102
	Highest Math	23andMe	1132932	0.1573	0.0045	2.0726	2.5449	1.1525	0.0141
	Self-Rated Math Ability	23andMe	1132962	0.1479	0.004	2.2826	2.8728	1.1355	0.0157
Fertility and Sexual Development
	Age First Birth	23andMe	1061425	0.2026	0.0509	1.0557	1.0427	1.0048	0.0066
		Barban	1055176	0.0565	0.003	1.1908	1.2259	0.9569	0.0075
		Mills	1179389	0.0554	0.0021	1.4709	1.6207	1.0216	0.01
		UKB1	1169144	0.1173	0.01	1.1459	1.195	1.0363	0.0078
		UKB2	1169263	0.1397	0.01	1.1459	1.186	1.009	0.0066
		UKB3	1169308	0.1359	0.0093	1.1459	1.1903	1.0167	0.0077
	Age First Menses (Women)	23andMe	1135892	0.1905	0.0117	1.0926	1.1864	0.894	0.0084
		Day	1175506	0.1834	0.006	1.6372	1.9711	1.06	0.0115
		Perry	1053931	0.1567	0.0071	1.3101	1.401	0.9881	0.0099
		UKB1	1169146	0.242	0.0131	1.3101	1.4023	1.0223	0.0084
		UKB2	1169234	0.2416	0.0133	1.3101	1.3899	1.0189	0.0078
		UKB3	1169308	0.2246	0.0134	1.2531	1.3629	1.0162	0.0091
	Age First Sex	Mills	1180279	0.1509	0.0049	1.8405	2.2236	1.0336	0.0139
		UKB1	1168686	0.1193	0.0065	1.3101	1.342	1.0325	0.0089
		UKB2	1168808	0.1279	0.0068	1.2531	1.3256	0.9954	0.0082
		UKB3	1168825	0.1223	0.0079	1.2531	1.3347	1.0111	0.0092
	Age Voice Deepened (Men)	23andMe	1135979	0.0885	0.0096	1.0436	1.0565	0.9564	0.0073
	Childlessness (Men)	UKB1	1168625	0.0497	0.0132	1.0466	1.0417	0.9944	0.0075
		UKB2	1168756	0.0558	0.0113	1.0466	1.0374	0.9878	0.0063
		UKB3	1168752	0.0323	0.0115	1.0466	1.0324	1.0041	0.0068
	Childlessness (Pooled)	Mathieson	1174558	0.0364	0.002	1.2531	1.3363	1.0124	0.0082
	Childlessness (Women)	UKB1	1168688	0.0463	0.0072	1.0957	1.0821	1.0117	0.0068
		UKB2	1168825	0.028	0.0074	1.0466	1.0584	1.0183	0.0073
		UKB3	1168878	0.051	0.0074	1.0466	1.0656	0.9924	0.0065
	Number Ever Born (Men)	Barban	1055168	0.0388	0.0056	1.0405	1.0417	0.9715	0.0062
		UKB1	1168625	0.046	0.0111	1.0466	1.0457	1.0024	0.0067
		UKB2	1168756	0.05	0.0118	1.0466	1.0378	0.9932	0.0064
		UKB3	1168752	0.0354	0.0119	1.0466	1.0338	1.0035	0.0069
	Number Ever Born (Pooled)	Mathieson	1176570	0.0288	0.0014	1.3615	1.4577	1.0105	0.0081
	Number Ever Born (Women)	Barban	1055172	0.0241	0.0024	1.0588	1.0717	0.9729	0.0066
		UKB1	1168688	0.0579	0.0072	1.0957	1.1042	1.0158	0.0062
		UKB2	1168825	0.0548	0.0081	1.0957	1.0884	1.0098	0.0076
		UKB3	1168878	0.0792	0.0083	1.0957	1.0966	0.9819	0.0064
Health
	Allergy - Cat	23andMe	1064902	0.0991	0.0134	1.071	1.0942	0.9999	0.0078
	Allergy - Dust	23andMe	1064902	0.0852	0.0124	1.0649	1.0771	0.9956	0.0071
	Allergy - Pollen	23andMe	1064902	0.12	0.0149	1.0802	1.1143	0.9993	0.0083
		UKB1	1168697	0.0082	0.0036	1.0466	1.0421	1.0182	0.0066
		UKB2	1168803	0.0164	0.0038	1.0466	1.0507	1.0027	0.0069
		UKB3	1168823	0.0082	0.0039	0.9986	1.0311	1.0073	0.0073
	Asthma	23andMe	1062533	0.19	0.0388	1.0618	1.0685	1.0084	0.0078
		Tsuo excl UKB	948330	0.0196	0.0016	1.3719	1.5798	1.0711	0.0168
		UKB1	1168694	0.0635	0.0073	1.1459	1.2078	1.021	0.0093
		UKB2	1168811	0.0538	0.0069	1.1459	1.1749	1.0185	0.0091
		UKB3	1168824	0.0621	0.0068	1.1459	1.197	1.014	0.0089
	Asthma/Eczema/Rhinitis	23andMe	1136006	0.0577	0.0071	1.2038	1.2755	1.1164	0.01
		Ferreira	1171067	0.0725	0.0066	1.2136	1.3512	1.0052	0.0124
		UKB1	1168692	0.0797	0.0073	1.1459	1.2516	1.029	0.0103
		UKB2	1168817	0.0689	0.0071	1.1459	1.2228	1.0332	0.0097
		UKB3	1168828	0.0821	0.0081	1.1459	1.2368	1.0073	0.0105
	Breast cancer	UKB1	1168706	0.0281	0.0082	1.0466	1.0626	1.0174	0.0078
		UKB2	1168825	0.0402	0.0089	1.0466	1.0686	1.0054	0.0083
		UKB3	1168879	0.0397	0.0076	1.0466	1.0741	1.0115	0.008
		Zhang	811905	0.0996	0.014	1.4673	1.9401	1.3695	0.0707
	COPD	Tsuo	951681	0.0183	0.001	1.2865	1.3687	1.02	0.0098
		UKB1	1168695	0.0222	0.0034	1.0957	1.0801	1.0148	0.0064
		UKB2	1168811	0.0331	0.0038	1.0957	1.0982	1.002	0.007
		UKB3	1168824	0.0435	0.004	1.0957	1.1119	0.9835	0.0066
	Coronart Artery Disease	Aragam	639328	0.0665	0.0048	1.4316	1.7879	0.9947	0.0212
		Nelson	1162323	0.0441	0.0028	1.0496	1.1452	0.8542	0.0092
		Nikpay	1124720	0.0672	0.0051	1.0527	1.1328	0.8828	0.0086
		UKB1	1168696	0.0381	0.004	1.0957	1.1384	1.0272	0.0073
		UKB2	1168810	0.0454	0.0043	1.1459	1.1432	1.013	0.0069
		UKB3	1168826	0.0537	0.0045	1.0957	1.1566	1.0006	0.0078
	Eczema	UKB1	1168668	0.0027	0.0043	0.9986	1.0291	1.0235	0.0066
		UKB2	1168771	0.0093	0.0047	0.9986	1.0174	0.9971	0.0072
		UKB3	1168824	0.01	0.0043	0.9986	1.0216	1	0.0062
	Hayfever	23andMe	1062533	0.19	0.0388	1.0618	1.0685	1.0084	0.0078
		UKB1	1168697	0.0666	0.0067	1.1459	1.2051	1.0314	0.0089
		UKB2	1168801	0.0625	0.0065	1.1459	1.1738	1.0145	0.0083
		UKB3	1168833	0.0598	0.0067	1.0957	1.1617	1.0089	0.0079
	Inflammatory Bowel Disease	Liu	1079952	0.3243	0.0376	1.1843	1.2946	1.0594	0.0136
		UKB1	1168703	0.0115	0.0034	1.0466	1.0381	1.0058	0.0062
		UKB2	1168816	0.0114	0.0043	1.0466	1.0473	1.0151	0.0077
		UKB3	1168822	0.0156	0.0037	1.0466	1.0393	0.996	0.0067
	Migraine	23andMe	1136053	0.0604	0.0029	1.3034	1.3742	1.0337	0.0094
		Gormley	1163856	0.037	0.0032	1.1428	1.1735	1.0258	0.0081
		Hautakangas	1161768	0.0284	0.0017	1.2664	1.3553	1.0329	0.0097
		UKB1	1168668	0.0446	0.0042	1.0957	1.1337	1.0087	0.0075
		UKB2	1168816	0.0366	0.0038	1.0957	1.1026	1.0016	0.0068
		UKB3	1168827	0.0365	0.0042	1.0957	1.0998	0.9972	0.0068
	Nearsightedness	23andMe	1135992	0.1649	0.0079	1.4245	1.6808	1.0477	0.0108
		Hysi	1177524	0.267	0.0127	1.7925	2.4208	1.1036	0.0239
		UKB1	1168678	0.145	0.0109	1.1715	1.2232	1.0149	0.0102
		UKB2	1168823	0.1291	-0.0112	1.1333	1.1673	1.0301	0.0074
		UKB3	1168898	0.1355	-0.0134	1.1301	1.1591	1.0125	0.0075
	Prostate Cancer	Schumacher	807796	0.1008	0.0237	1.2267	1.4773	1.177	0.0916
		UKB1	1168662	0.055	0.0092	1.0466	1.0917	1.0175	0.0098
		UKB2	1168798	0.0391	0.0079	1.0466	1.0697	1.0159	0.0096
		UKB3	1168786	0.0464	0.0088	1.0466	1.0808	1.0183	0.0092
	Self-Rated Health	23andMe	1132993	0.0746	0.0021	1.9465	2.2871	1.1245	0.0133
		UKB1	1169127	0.0914	0.0051	1.2531	1.2984	1.0334	0.0078
		UKB2	1169235	0.0913	0.0051	1.2531	1.2818	1.0173	0.0082
		UKB3	1169253	0.0934	0.0046	1.2531	1.2907	1.0141	0.0076
	Type-II Diabetes	Mahajan	1173507	0.0481	0.0025	1.4926	1.8536	0.9894	0.0213
		Scott	1182926	0.0785	0.0057	1.1459	1.2316	0.9979	0.0096
		UKB1	1168700	0.0586	0.0051	1.2005	1.2165	1.0414	0.0087
		UKB2	1168808	0.0666	0.0055	1.1459	1.2251	1.0345	0.0074
		UKB3	1168818	0.07	0.0048	1.2005	1.2276	1.0249	0.009
Personality and Well-Being
	Adventurousness	23andMe	1132963	0.0808	0.0025	1.7062	1.9952	1.0498	0.0116
	Agreeableness	23andMe	1135891	0.0823	0.0089	1.0466	1.0502	0.9506	0.0071
	Cognitive Empathy	23andMe	1135837	0.102	0.0134	1.0926	1.0976	1.0008	0.0078
	Conscientiousness	23andMe	1135891	0.0916	0.0082	1.0466	1.049	0.9413	0.0063
	Delay Discounting	23andMe	1139056	0.0721	0.0194	1.0436	1.0461	1.0131	0.0066
	Extraversion	23andMe	1135894	0.1771	0.0092	1.0741	1.1026	0.8917	0.0068
		vandenBerg	1143380	0.0503	0.0079	1.0588	1.066	1.0021	0.0064
	Left out of Social Activity	23andMe	1132962	0.0588	0.0021	1.4853	1.6323	1.0287	0.0105
	Life Satisfaction: Family	UKB1	1169102	0.0667	0.009	1.0957	1.0906	1.0091	0.0069
		UKB2	1169260	0.0484	0.0083	1.0466	1.0506	0.9997	0.0062
		UKB3	1169319	0.0665	0.009	1.0466	1.066	0.996	0.0068
	Life Satisfaction: Finance	UKB1	1169104	0.0559	0.0082	1.0957	1.0786	1.0107	0.0071
		UKB2	1169271	0.0463	0.0097	1.0466	1.0487	0.9991	0.0069
		UKB3	1169317	0.0701	0.0106	1.0466	1.0638	0.9897	0.0065
	Life Satisfaction: Friends	UKB1	1169096	0.0714	0.0089	1.0957	1.0825	0.9953	0.0066
		UKB2	1169280	0.065	0.0087	1.0466	1.0645	0.996	0.0058
		UKB3	1169306	0.0736	0.0095	1.0466	1.0693	0.9926	0.0066
	Life Satisfaction: Work	UKB1	1169098	0.0346	0.0113	1.0466	1.0377	1.0094	0.0069
		UKB2	1169303	0.042	0.0138	1.0466	1.0313	1.0008	0.0068
		UKB3	1169298	0.071	0.0133	1.0466	1.0383	0.9876	0.0064
	Loneliness	UKB1	1169118	0.0405	0.0039	1.0957	1.1182	1.0016	0.0076
		UKB2	1169249	0.0352	0.0038	1.0957	1.1126	1.0101	0.0066
		UKB3	1169248	0.0372	0.0037	1.0957	1.1137	1.0075	0.0073
	Morning Person	23andMe	1081150	0.1636	0.009	1.2631	1.3109	1.0068	0.0086
		UKB1	1169123	0.1203	0.006	1.3101	1.345	1.0232	0.0083
		UKB2	1169235	0.1086	0.0059	1.2531	1.3155	1.0252	0.0085
		UKB3	1169259	0.1188	0.0062	1.2531	1.3305	1.0214	0.0076
	Musical beat synchronization	23andMe	1093627	0.0516	0.002	1.489	1.6391	1.0126	0.0111
	Narcissism	23andMe	1132940	0.0465	0.0025	1.3409	1.4465	1.0151	0.0105
	Neuroticism	23andMe	1135894	0.1155	0.0141	1.0436	1.0635	0.9215	0.0094
		deMoor	1053408	0.0351	0.0092	1.0588	1.0612	1.0185	0.0072
		UKB1	1169129	0.1138	0.0064	1.2531	1.2903	1.0176	0.0086
		UKB2	1169241	0.1221	0.0088	1.2531	1.3169	1.0138	0.0093
		UKB3	1169243	0.1157	0.0087	1.2005	1.2746	0.994	0.0096
	Openness	23andMe	1135891	0.1041	0.0092	1.0557	1.0631	0.9382	0.0074
		deMoor	886144	0.121	0.0289	1.0345	1.0328	0.9869	0.0083
	Physical Activity	23andMe	1081932	0.0621	0.003	1.3	1.3553	1.0201	0.0088
		Doherty	1169289	0.1456	0.0081	1.2531	1.2707	1.0087	0.0079
		Wang	1181027	0.0289	0.0016	1.3	1.3644	1.0217	0.0083
	Recharge by Socializing	23andMe	1132946	0.0355	0.0017	1.3135	1.3669	1.0235	0.0088
	Religious Attendance	UKB1	1169127	0.051	0.0042	1.2005	1.1998	1.0535	0.007
		UKB2	1169237	0.0507	0.004	1.1459	1.1444	0.9961	0.0068
		UKB3	1169249	0.0413	0.0047	1.0957	1.1373	1.0149	0.008
	Religious Belief	23andMe	1132718	0.0688	0.0061	1.1301	1.1403	1.0192	0.0069
	Risk Tolerance	23andMe	1060095	0.0411	0.0026	1.6296	1.8921	1.0253	0.0214
		Linner	1173742	0.0531	0.0025	1.3929	1.5041	1.019	0.0099
		UKB1	1169105	0.0524	0.0052	1.1459	1.1613	1.0103	0.0076
		UKB2	1169251	0.0549	0.0046	1.1459	1.1578	0.9997	0.0077
		UKB3	1169241	0.0571	0.0043	1.1459	1.1677	1.0068	0.0075
	Subjective Well-Being	23andMe	1060034	0.041	0.0016	1.5217	1.6532	1.0441	0.0109
		Okbay1kG excl 23andMe & UKB	1121885	0.0378	0.005	1.0679	1.0744	1.0029	0.0071
		Okbay1kG excl 23andMe & UKB & ALSPAC	1118109	0.0392	0.0054	1.071	1.0717	1.0017	0.0073
		Okbay1kG excl 23andMe & UKB & FinnGen	1118402	0.0363	0.0053	1.0679	1.0729	1.0094	0.0074
		Okbay1kG excl 23andMe & UKB & HRS	1113730	0.0332	0.0055	1.0557	1.0617	1.005	0.0072
		Okbay1kG excl 23andMe & UKB & MCTFR	1119290	0.0364	0.0052	1.0588	1.0701	1.0038	0.0073
		Okbay1kG excl 23andMe & UKB & STR	1119533	0.0378	0.0053	1.0557	1.0634	1.0024	0.0064
		UKB1	1169109	0.0643	0.0086	1.0957	1.0894	1.0099	0.0071
		UKB2	1169255	0.0644	0.0096	1.0466	1.0736	1.0048	0.0063
		UKB3	1169323	0.0762	0.0087	1.0466	1.0709	0.9906	0.006
Psychiatric
	Anorexia Nervosa	Duncan	1115975	0.2439	0.0387	1.0802	1.0803	1.0087	0.0075
		Watson	901985	0.1818	0.0125	1.2664	1.3132	1.0247	0.0114
		UKB	1168791	0.0124	0.0068	1.0195	1.023	1.0041	0.007
	Attention Deficit Hyperactivity Disorder (ADHD)	23andMe	1142695	0.0315	0.0077	1.0436	1.0493	1.0094	0.007
		Demontis	1111733	0.0949	0.0044	1.3581	1.4509	1.0294	0.0092
	Autism Spectrum Disorder	Grove	1046432	0.1955	0.0169	1.1715	1.2005	1.0077	0.0098
	Bipolar Disorder	Mullins	1089077	0.0706	0.0029	1.4745	1.6253	1.033	0.0116
		Stahl	1095318	0.3501	0.0172	1.3272	1.3897	1.0197	0.0102
		UKB1	1168668	0.0335	0.0143	1.0466	1.0273	1.0075	0.0062
		UKB2	1168844	0.0635	0.0176	0.9986	1.0252	0.9952	0.0059
		UKB3	1168846	0.0455	0.019	1.0466	1.0285	1.0065	0.0062
	Depressive Symptoms	23andMe	1144263	0.0515	0.0029	1.2697	1.3221	1.006	0.0088
		GERA	642713	0.0251	0.0092	1.0105	1.0309	0.9978	0.0084
		UKB1	1169121	0.0737	0.005	1.2005	1.2097	1.0113	0.0074
		UKB2	1169226	0.0704	0.0052	1.2005	1.1951	1.0069	0.0071
		UKB3	1169235	0.0666	0.0045	1.1459	1.1797	1.0027	0.007
		Wray excl UKB	1081612	0.074	0.0052	1.2005	1.2182	0.996	0.0098
	Insomnia	23andMe	1133005	0.0473	0.0016	1.7179	1.953	1.0543	0.013
		Jansen	1132864	0.046	0.002	1.3101	1.3667	1.0143	0.0088
		UKB1	1168697	0.046	0.004	1.1459	1.1546	1.0214	0.0071
		UKB2	1168813	0.047	0.004	1.1459	1.1414	1.0036	0.0069
		UKB3	1168822	0.0412	0.0041	1.0957	1.1275	1.0063	0.0075
	Schizophrenia	Trubetskoy	1102723	0.3358	0.0132	1.8445	2.2117	1.0791	0.0173
		UKB1	1168664	0.0477	0.0169	1.0466	1.0326	1.0046	0.0061
		UKB2	1168847	0.0255	0.0202	0.9986	1.013	1.0012	0.0065
		UKB3	1168839	0.0289	0.0201	0.9986	1.0132	0.9999	0.0064
Substance use
	Alcohol Misuse	23andMe	1139039	0.0954	0.0249	1.0255	1.0341	0.9974	0.0073
		UKB1	1169150	0.0821	0.0109	1.0957	1.094	1.011	0.0073
		UKB2	1169287	0.0935	0.0127	1.0957	1.0771	1.0029	0.0063
		UKB3	1169281	0.0703	0.0127	1.0466	1.0618	1.0043	0.0062
		Walters	1175538	0.0609	0.0097	1.071	1.0661	1.0117	0.006
	Age Smoking Initiation	23andMe	1168904	0.0549	0.0069	1.0772	1.0793	0.9947	0.0066
		Liu	1162105	0.0475	0.003	1.2005	1.2222	0.9795	0.0075
		Saunders	1177442	0.0485	0.0028	1.2865	1.3414	1.0391	0.0081
		Saunders excl UKB	1173562	0.0316	0.0036	1.127	1.1403	1.0332	0.0072
		UKB1	1168677	0.0301	0.0103	1.0466	1.0338	1.0038	0.0067
		UKB2	1168801	0.0319	0.011	1.0466	1.0318	1.001	0.007
		UKB3	1168847	0.0482	0.0097	1.0466	1.0402	0.994	0.0069
	Cannabis Use	23andMe	1132700	0.0717	0.0199	1.0345	1.0359	1.003	0.0068
		Stringer	1115596	0.0816	0.0141	1.0557	1.0583	1	0.0064
		UKB1	1169113	0.0742	0.0103	1.0957	1.099	1.0166	0.0075
		UKB2	1169266	0.0712	0.0125	1.0466	1.0707	1.0084	0.0069
		UKB3	1169287	0.0664	0.0122	1.0466	1.0677	1.0092	0.0069
	Cigarettes per day	23andMe	1168892	0.1085	0.0161	1.1238	1.1457	0.9896	0.0091
		UKB1	1169088	0.0703	0.0135	1.0466	1.0829	1.0194	0.0072
		UKB2	1169232	0.0982	0.0147	1.0957	1.0864	0.9971	0.0071
		UKB3	1169271	0.097	0.0151	1.0957	1.088	1.0001	0.0069
		Liu	1175382	0.0756	0.0095	1.2267	1.3312	0.9476	0.0157
		Saunders	1177625	0.0842	0.0119	1.4175	1.5726	1.0471	0.022
		Saunders excl UKB	1173065	0.0726	0.0121	1.2234	1.2992	1.0445	0.0136
	Drinks per Week	23andMe	1169042	0.0372	0.0022	1.2631	1.3188	1.0251	0.0092
		Liu	1175301	0.0493	0.0023	1.3169	1.4473	0.9211	0.0089
		Saunders	1177411	0.0547	0.0025	1.6145	1.8181	1.093	0.0121
		Saunders excl UKB	1177329	0.04	0.0027	1.2201	1.2666	1.0262	0.008
		UKB1	1169116	0.0609	0.0047	1.1459	1.1789	1.024	0.0067
		UKB2	1169241	0.0579	0.0048	1.1459	1.1543	1.0069	0.0066
		UKB3	1169246	0.0687	0.0047	1.1459	1.164	0.9922	0.0066
	Ever Smoker	23andMe	1169017	0.0916	0.0033	1.7727	2.116	1.0169	0.0128
		Liu	1167968	0.0694	0.0023	1.4926	1.7439	0.8863	0.0093
		Saunders	1177400	0.0881	0.0028	1.984	2.4367	1.0429	0.0139
		Saunders excl UKB	1173626	0.0782	0.0034	1.4781	1.5876	1.0479	0.0094
		UKB1	1169123	0.1035	0.0055	1.2531	1.3146	1.0137	0.007
		UKB2	1169249	0.0981	0.0055	1.2531	1.2957	1.0075	0.0076
		UKB3	1169251	0.097	0.0051	1.2531	1.2907	1.0064	0.0079
	Smoking Cessation	23andMe	1169057	0.0417	0.0031	1.1876	1.2172	1.0191	0.0085
		Liu	1165826	0.0323	0.0022	1.1523	1.1791	0.9788	0.0082
		Saunders	1177583	0.0489	0.0027	1.3409	1.4183	1.0439	0.0117
		Saunders excl UKB	1173623	0.0371	0.0034	1.1619	1.1773	1.0395	0.008
		UKB1	1168702	0.0457	0.0072	1.0957	1.0709	1.0097	0.0071
		UKB2	1168860	0.0536	0.0077	1.0466	1.0752	1.0027	0.0064
		UKB3	1168855	0.0521	0.0079	1.0466	1.0722	1.0012	0.007
Notes: "h2" is heritability. "Intercept" is LD score regression intercept. "λGC" is genomic inflation factor. "Mean χ2" is mean χ2-statistic. "SE" is standard error.

## Sheet: 10. Within-pheno rg
Supplementary Table 9: Bivariate LD score regression results for each pair of GWAS included in the meta-analyses
	GWAS1	GWAS2	rg	SE(rg)	Intercept	SE(Intercept)
Anthropometric
Body Mass Index (BMI)	Locke	UKB1	0.9407	0.0151	0.0005	0.0094
	Locke	UKB2	0.9482	0.014	0.0053	0.0088
	Locke	UKB3	0.9366	0.0131	0.0055	0.0089
	UKB1	UKB2	1.0071	0.0145	0.0235	0.0096
	UKB1	UKB3	1.0076	0.0145	0.0167	0.0096
	UKB2	UKB3	1.0039	0.0143	0.0191	0.0089
Height	23andMe-female	23andMe-male	0.9739	0.0044	0.8164	0.1815
	23andMe-female	UKB1	0.9631	0.0071	0.2795	0.0823
	23andMe-female	UKB2	0.9605	0.0076	0.2982	0.084
	23andMe-female	UKB3	0.965	0.0064	0.2755	0.0842
	23andMe-female	Wood	0.9519	0.0081	0.2983	0.0848
	23andMe-female	Yengo	0.9803	0.0043	0.8288	0.1918
	23andMe-female	Yengo excl UKB	0.9852	0.0051	0.7009	0.1483
	23andMe-male	UKB1	0.9541	0.0076	0.2492	0.0765
	23andMe-male	UKB2	0.9547	0.0074	0.2626	0.0779
	23andMe-male	UKB3	0.9528	0.0073	0.2516	0.0758
	23andMe-male	Wood	0.9498	0.0071	0.2695	0.0794
	23andMe-male	Yengo	0.9757	0.0045	0.7691	0.1779
	23andMe-male	Yengo excl UKB	0.9856	0.0052	0.6525	0.1396
	UKB1	UKB2	0.9854	0.0084	0.1202	0.0289
	UKB1	UKB3	0.9836	0.0078	0.1099	0.0301
	UKB2	UKB3	0.9962	0.0094	0.113	0.0299
	Wood	UKB1	0.9539	0.0094	0.094	0.031
	Wood	UKB2	0.9547	0.0084	0.0981	0.0318
	Wood	UKB3	0.9425	0.0096	0.1071	0.032
	Wood	Yengo	0.9767	0.0063	0.5877	0.0785
	Wood	Yengo excl UKB	0.9907	0.0061	0.6262	0.0617
	Yengo	UKB1	0.9844	0.0058	0.654	0.0759
	Yengo	UKB2	0.9841	0.006	0.6533	0.0788
	Yengo	UKB3	0.9828	0.0056	0.643	0.0789
	Yengo	Yengo excl UKB	0.9995	0.0023	1.698	0.1597
	Yengo excl UKB	UKB1	0.9859	0.0084	0.2618	0.0594
	Yengo excl UKB	UKB2	0.9807	0.0081	0.2784	0.0625
	Yengo excl UKB	UKB3	0.9735	0.0075	0.2771	0.0628
Biomarkers
Blood lipids - HDL cholesterol	Graham	Graham excl UKB	1.0218	0.0043	1.2178	0.1077
	Graham	SinnottArmstrong	1.0279	0.0435	0.648	0.0901
	Graham	UKB1	1.0325	0.0542	0.4215	0.0557
	Graham	UKB2	1.0196	0.0466	0.4223	0.0551
	Graham	UKB3	1.027	0.0487	0.4277	0.0571
	Graham excl UKB	SinnottArmstrong	1.0398	0.0464	0.2742	0.0881
	Graham excl UKB	UKB1	1.0413	0.0554	0.1878	0.0556
	Graham excl UKB	UKB2	1.0221	0.0471	0.195	0.0559
	Graham excl UKB	UKB3	1.0307	0.0494	0.198	0.0575
	SinnottArmstrong	UKB1	1.0228	0.0308	0.4941	0.0599
	SinnottArmstrong	UKB2	1.0147	0.0267	0.7223	0.0601
	SinnottArmstrong	UKB3	1.0186	0.0283	0.751	0.0627
	UKB1	UKB2	1.0241	0.0298	0.1138	0.0458
	UKB1	UKB3	1.0317	0.0331	0.1256	0.0462
	UKB2	UKB3	0.9909	0.025	0.1342	0.0464
Blood lipids - LDL cholesterol	Graham	Graham excl UKB	1.0313	0.0112	1.0406	0.0951
	Graham	SinnottArmstrong	0.9789	0.0292	0.5696	0.0929
	Graham	UKB1	1.0366	0.0936	0.3761	0.0574
	Graham	UKB2	1.0459	0.0985	0.3673	0.0583
	Graham	UKB3	1.0542	0.0945	0.3754	0.058
	Graham excl UKB	SinnottArmstrong	0.9689	0.0254	0.1803	0.096
	Graham excl UKB	UKB1	1.0319	0.0924	0.1296	0.0606
	Graham excl UKB	UKB2	1.0455	0.0974	0.1234	0.0613
	Graham excl UKB	UKB3	1.0527	0.0943	0.1341	0.0614
	SinnottArmstrong	UKB1	1.0199	0.042	0.4348	0.0669
	SinnottArmstrong	UKB2	1.0262	0.0373	0.6517	0.0674
	SinnottArmstrong	UKB3	1.0433	0.0375	0.6781	0.0686
	UKB1	UKB2	0.9903	0.0276	0.1207	0.0841
	UKB1	UKB3	1.0272	0.0286	0.1156	0.0823
	UKB2	UKB3	1.0112	0.0281	0.1206	0.0833
Blood lipids - nonHDL cholesterol	Graham	Graham excl UKB	1.0235	0.0145	1.0246	0.0763
	Graham	UKB1	1.0582	0.0934	0.4077	0.0521
	Graham	UKB2	1.0698	0.1064	0.407	0.0526
	Graham	UKB3	1.0844	0.1097	0.4114	0.0528
	Graham excl UKB	UKB1	1.0699	0.0861	0.1167	0.0545
	Graham excl UKB	UKB2	1.0915	0.1006	0.1166	0.0545
	Graham excl UKB	UKB3	1.1029	0.1039	0.1248	0.0547
	UKB1	UKB2	0.9881	0.0313	0.1302	0.082
	UKB1	UKB3	1.0249	0.0353	0.128	0.0814
	UKB2	UKB3	0.9766	0.0272	0.1434	0.087
Blood lipids - Total cholesterol	Graham	Graham excl UKB	1.0174	0.0068	1.082	0.0822
	Graham	SinnottArmstrong	0.9817	0.0303	0.5772	0.0826
	Graham	UKB1	1.0302	0.0884	0.3804	0.0514
	Graham	UKB2	1.0397	0.0875	0.3743	0.0521
	Graham	UKB3	1.0644	0.0954	0.3925	0.0517
	Graham excl UKB	SinnottArmstrong	0.9869	0.0289	0.1897	0.0808
	Graham excl UKB	UKB1	1.0347	0.0835	0.1334	0.0518
	Graham excl UKB	UKB2	1.0497	0.0834	0.1293	0.0525
	Graham excl UKB	UKB3	1.0711	0.0929	0.15	0.0522
	SinnottArmstrong	UKB1	1.0243	0.0442	0.4232	0.0651
	SinnottArmstrong	UKB2	1.029	0.0397	0.6449	0.0651
	SinnottArmstrong	UKB3	1.042	0.0394	0.6729	0.065
	UKB1	UKB2	0.9739	0.0226	0.1139	0.0809
	UKB1	UKB3	1.0276	0.0403	0.1142	0.0787
	UKB2	UKB3	1.0207	0.0405	0.1151	0.077
Blood lipids - Tryglycerids	Graham	Graham excl UKB	1.005	0.0084	1.0134	0.1431
	Graham	SinnottArmstrong	0.9705	0.0076	0.4898	0.0667
	Graham	UKB1	0.955	0.0126	0.3393	0.0685
	Graham	UKB2	0.9581	0.0126	0.3359	0.0655
	Graham	UKB3	0.9652	0.0136	0.3318	0.0696
	Graham excl UKB	SinnottArmstrong	0.9776	0.0109	0.0932	0.059
	Graham excl UKB	UKB1	0.9598	0.0144	0.0828	0.0621
	Graham excl UKB	UKB2	0.9666	0.014	0.0804	0.0593
	Graham excl UKB	UKB3	0.9751	0.0143	0.0773	0.0628
	SinnottArmstrong	UKB1	0.9963	0.0107	0.3761	0.0319
	SinnottArmstrong	UKB2	0.9974	0.0095	0.5965	0.032
	SinnottArmstrong	UKB3	0.9946	0.0087	0.6211	0.0337
	UKB1	UKB2	0.9952	0.0174	0.031	0.0278
	UKB1	UKB3	0.9804	0.0179	0.0413	0.0298
	UKB2	UKB3	0.9711	0.0192	0.0417	0.0288
Blood Pressure - Diastolic	Evangelou	Evangelou excl UKB	0.9859	0.0055	0.7431	0.0272
	Evangelou	UKB1	0.9122	0.0098	0.4431	0.0204
	Evangelou	UKB2	0.91	0.011	0.4597	0.0184
	Evangelou	UKB3	0.9186	0.0096	0.4508	0.0194
	Evangelou excl UKB	UKB1	0.8913	0.0176	0.0461	0.0157
	Evangelou excl UKB	UKB2	0.8772	0.0183	0.0496	0.0147
	Evangelou excl UKB	UKB3	0.8897	0.0187	0.0496	0.0138
	UKB1	UKB2	1.0034	0.02	0.0494	0.0113
	UKB1	UKB3	1.0203	0.018	0.0353	0.011
	UKB2	UKB3	1.0039	0.0191	0.0471	0.0103
Blood Pressure - Pulse	Evangelou	Evangelou excl UKB	0.9922	0.0086	0.7127	0.0222
	Evangelou	UKB1	0.9883	0.0106	0.434	0.0178
	Evangelou	UKB2	0.9781	0.0087	0.4221	0.0176
	Evangelou	UKB3	0.982	0.0096	0.4362	0.0173
	Evangelou excl UKB	UKB1	0.9528	0.0211	0.0372	0.0142
	Evangelou excl UKB	UKB2	0.9529	0.0216	0.0127	0.0128
	Evangelou excl UKB	UKB3	0.9601	0.0219	0.0187	0.0138
	UKB1	UKB2	1.0306	0.0203	0.0243	0.0113
	UKB1	UKB3	0.9969	0.0202	0.0444	0.011
	UKB2	UKB3	0.9915	0.0175	0.0381	0.0109
Blood Pressure - Systolic	Evangelou	Evangelou excl UKB	0.9901	0.0062	0.7548	0.0277
	Evangelou	UKB1	0.9546	0.0113	0.4523	0.019
	Evangelou	UKB2	0.9565	0.0096	0.4413	0.0183
	Evangelou	UKB3	0.9492	0.0089	0.449	0.0183
	Evangelou excl UKB	UKB1	0.9316	0.0198	0.0558	0.0168
	Evangelou excl UKB	UKB2	0.9325	0.0188	0.0365	0.0153
	Evangelou excl UKB	UKB3	0.9258	0.0178	0.0384	0.0152
	UKB1	UKB2	1.026	0.021	0.0438	0.0114
	UKB1	UKB3	1.0173	0.0202	0.0434	0.0105
	UKB2	UKB3	0.9942	0.0175	0.0491	0.0102
Cognition and Education
Alzheimer's	23andMe	Bellenguez	0.8357	0.2291	0.0194	0.0169
	23andMe	Kunkle	0.8608	0.3328	0.03	0.0268
	23andMe	Wightman	0.9067	0.2917	0.0402	0.0382
	Bellenguez	Kunkle	1.0396	0.0739	0.2093	0.0201
	Bellenguez	Wightman	0.925	0.0461	0.4458	0.0364
	Kunkle	Wightman	0.8483	0.1119	0.3693	0.0534
Childhood Reading	N/A
Cognitive Performance	Trampush	UKB1	0.8986	0.0601	0.0101	0.0068
	Trampush	UKB2	0.915	0.0649	-0.0039	0.006
	Trampush	UKB3	0.9749	0.0654	-0.0023	0.0061
	UKB1	UKB2	1.0001	0.0289	0.0016	0.0072
	UKB1	UKB3	0.9682	0.026	0.0141	0.0069
	UKB2	UKB3	0.9939	0.0295	0.0085	0.0069
Educational Attainment	23andMe	Okbay excl 23andMe	0.9057	0.0063	0.1311	0.028
	23andMe	Okbay excl 23andMe & AH	0.9043	0.0064	0.1272	0.028
	23andMe	Okbay excl 23andMe & ALSPAC	0.9053	0.0063	0.1308	0.0279
	23andMe	Okbay excl 23andMe & ELSA	0.9061	0.0063	0.1299	0.028
	23andMe	Okbay excl 23andMe & EstBB	0.9001	0.0063	0.1315	0.0278
	23andMe	Okbay excl 23andMe & FinnGen	0.9051	0.0063	0.1309	0.028
	23andMe	Okbay excl 23andMe & GS	0.9036	0.0063	0.1305	0.0279
	23andMe	Okbay excl 23andMe & HRS	0.905	0.0063	0.1235	0.0276
	23andMe	Okbay excl 23andMe & MCTFR	0.9052	0.0063	0.1314	0.0278
	23andMe	Okbay excl 23andMe & NCDS	0.9054	0.0063	0.1312	0.028
	23andMe	Okbay excl 23andMe & STR	0.9056	0.0063	0.1305	0.0281
	23andMe	Okbay excl 23andMe & UKB	0.9354	0.01	0.0652	0.0198
	23andMe	Okbay excl 23andMe & WLS	0.9049	0.0063	0.1307	0.0278
	23andMe	UKB1	0.8789	0.0136	0.0686	0.019
	23andMe	UKB2	0.8852	0.012	0.0702	0.0187
	23andMe	UKB3	0.895	0.0112	0.0611	0.0193
	Okbay excl 23andMe	Okbay excl 23andMe & AH	0.9996	0.0025	0.997	0.0185
	Okbay excl 23andMe	Okbay excl 23andMe & ALSPAC	0.9999	0.0025	0.9983	0.0185
	Okbay excl 23andMe	Okbay excl 23andMe & ELSA	1.0002	0.0025	0.9963	0.0184
	Okbay excl 23andMe	Okbay excl 23andMe & EstBB	1.0007	0.0024	0.9766	0.0184
	Okbay excl 23andMe	Okbay excl 23andMe & FinnGen	0.9991	0.0025	0.9919	0.0185
	Okbay excl 23andMe	Okbay excl 23andMe & GS	1.0006	0.0024	0.9897	0.0185
	Okbay excl 23andMe	Okbay excl 23andMe & HRS	1.0001	0.0025	0.994	0.0184
	Okbay excl 23andMe	Okbay excl 23andMe & MCTFR	0.9996	0.0025	0.9982	0.0185
	Okbay excl 23andMe	Okbay excl 23andMe & NCDS	1.0001	0.0025	0.9983	0.0185
	Okbay excl 23andMe	Okbay excl 23andMe & STR	0.9989	0.0025	0.9929	0.0184
	Okbay excl 23andMe	Okbay excl 23andMe & UKB	1.0047	0.0055	0.6307	0.0125
	Okbay excl 23andMe	Okbay excl 23andMe & WLS	1	0.0025	0.9951	0.0186
	Okbay excl 23andMe	UKB1	0.9744	0.0088	0.4756	0.0123
	Okbay excl 23andMe	UKB2	0.9821	0.0072	0.4617	0.0119
	Okbay excl 23andMe	UKB3	0.9801	0.0078	0.4645	0.0121
	Okbay excl 23andMe & AH	Okbay excl 23andMe & ALSPAC	0.9995	0.0025	0.9957	0.0186
	Okbay excl 23andMe & AH	Okbay excl 23andMe & ELSA	0.9998	0.0025	0.9931	0.0184
	Okbay excl 23andMe & AH	Okbay excl 23andMe & EstBB	1.0002	0.0024	0.9738	0.0185
	Okbay excl 23andMe & AH	Okbay excl 23andMe & FinnGen	0.9988	0.0025	0.9894	0.0185
	Okbay excl 23andMe & AH	Okbay excl 23andMe & GS	1.0002	0.0025	0.9868	0.0185
	Okbay excl 23andMe & AH	Okbay excl 23andMe & HRS	0.9997	0.0025	0.9911	0.0185
	Okbay excl 23andMe & AH	Okbay excl 23andMe & MCTFR	0.9993	0.0025	0.9957	0.0185
	Okbay excl 23andMe & AH	Okbay excl 23andMe & NCDS	0.9997	0.0025	0.9954	0.0186
	Okbay excl 23andMe & AH	Okbay excl 23andMe & STR	0.9984	0.0025	0.9906	0.0185
	Okbay excl 23andMe & AH	Okbay excl 23andMe & UKB	1.004	0.0055	0.622	0.0125
	Okbay excl 23andMe & AH	Okbay excl 23andMe & WLS	0.9997	0.0025	0.9925	0.0186
	Okbay excl 23andMe & AH	UKB1	0.9747	0.0088	0.4778	0.0123
	Okbay excl 23andMe & AH	UKB2	0.9824	0.0072	0.4631	0.0119
	Okbay excl 23andMe & AH	UKB3	0.9805	0.0077	0.4655	0.0121
	Okbay excl 23andMe & ALSPAC	Okbay excl 23andMe & ELSA	1	0.0025	0.9945	0.0184
	Okbay excl 23andMe & ALSPAC	Okbay excl 23andMe & EstBB	1.0006	0.0024	0.9749	0.0184
	Okbay excl 23andMe & ALSPAC	Okbay excl 23andMe & FinnGen	0.999	0.0025	0.9907	0.0185
	Okbay excl 23andMe & ALSPAC	Okbay excl 23andMe & GS	1.0004	0.0024	0.988	0.0185
	Okbay excl 23andMe & ALSPAC	Okbay excl 23andMe & HRS	1	0.0025	0.9924	0.0184
	Okbay excl 23andMe & ALSPAC	Okbay excl 23andMe & MCTFR	0.9994	0.0025	0.9969	0.0185
	Okbay excl 23andMe & ALSPAC	Okbay excl 23andMe & NCDS	0.9999	0.0025	0.9967	0.0185
	Okbay excl 23andMe & ALSPAC	Okbay excl 23andMe & STR	0.9987	0.0025	0.9917	0.0185
	Okbay excl 23andMe & ALSPAC	Okbay excl 23andMe & UKB	1.0049	0.0055	0.6263	0.0125
	Okbay excl 23andMe & ALSPAC	Okbay excl 23andMe & WLS	0.9999	0.0025	0.9938	0.0186
	Okbay excl 23andMe & ALSPAC	UKB1	0.9744	0.0088	0.4762	0.0123
	Okbay excl 23andMe & ALSPAC	UKB2	0.9825	0.0072	0.4621	0.0118
	Okbay excl 23andMe & ALSPAC	UKB3	0.9802	0.0078	0.4649	0.0121
	Okbay excl 23andMe & ELSA	Okbay excl 23andMe & FinnGen	0.9993	0.0025	0.988	0.0183
	Okbay excl 23andMe & ELSA	Okbay excl 23andMe & GS	1.0008	0.0024	0.9856	0.0183
	Okbay excl 23andMe & ELSA	Okbay excl 23andMe & HRS	1.0003	0.0024	0.9901	0.0183
	Okbay excl 23andMe & ELSA	Okbay excl 23andMe & MCTFR	0.9998	0.0025	0.9944	0.0183
	Okbay excl 23andMe & ELSA	Okbay excl 23andMe & NCDS	1.0002	0.0025	0.9945	0.0184
	Okbay excl 23andMe & ELSA	Okbay excl 23andMe & STR	0.9992	0.0024	0.9889	0.0183
	Okbay excl 23andMe & ELSA	Okbay excl 23andMe & UKB	1.0057	0.0055	0.6206	0.0125
	Okbay excl 23andMe & ELSA	Okbay excl 23andMe & WLS	1.0002	0.0025	0.9912	0.0184
	Okbay excl 23andMe & ELSA	UKB1	0.9745	0.0088	0.4771	0.0123
	Okbay excl 23andMe & ELSA	UKB2	0.982	0.0073	0.4635	0.0118
	Okbay excl 23andMe & ELSA	UKB3	0.9801	0.0077	0.4657	0.0121
	Okbay excl 23andMe & EstBB	Okbay excl 23andMe & ELSA	1.001	0.0024	0.9723	0.0183
	Okbay excl 23andMe & EstBB	Okbay excl 23andMe & FinnGen	0.9999	0.0024	0.9683	0.0183
	Okbay excl 23andMe & EstBB	Okbay excl 23andMe & GS	1.0014	0.0024	0.9653	0.0184
	Okbay excl 23andMe & EstBB	Okbay excl 23andMe & HRS	1.0008	0.0024	0.9702	0.0183
	Okbay excl 23andMe & EstBB	Okbay excl 23andMe & MCTFR	1.0004	0.0024	0.9748	0.0184
	Okbay excl 23andMe & EstBB	Okbay excl 23andMe & NCDS	1.0007	0.0024	0.9747	0.0184
	Okbay excl 23andMe & EstBB	Okbay excl 23andMe & STR	0.9995	0.0024	0.9692	0.0184
	Okbay excl 23andMe & EstBB	Okbay excl 23andMe & UKB	1.0078	0.0063	0.568	0.0124
	Okbay excl 23andMe & EstBB	Okbay excl 23andMe & WLS	1.0006	0.0024	0.9716	0.0185
	Okbay excl 23andMe & EstBB	UKB1	0.9739	0.0089	0.4873	0.0123
	Okbay excl 23andMe & EstBB	UKB2	0.9829	0.0074	0.4729	0.0118
	Okbay excl 23andMe & EstBB	UKB3	0.9804	0.0076	0.4753	0.0121
	Okbay excl 23andMe & FinnGen	Okbay excl 23andMe & GS	0.9997	0.0024	0.9815	0.0184
	Okbay excl 23andMe & FinnGen	Okbay excl 23andMe & HRS	0.9992	0.0025	0.9858	0.0184
	Okbay excl 23andMe & FinnGen	Okbay excl 23andMe & MCTFR	0.9987	0.0025	0.9906	0.0184
	Okbay excl 23andMe & FinnGen	Okbay excl 23andMe & NCDS	0.9992	0.0025	0.9903	0.0185
	Okbay excl 23andMe & FinnGen	Okbay excl 23andMe & STR	0.998	0.0025	0.9852	0.0184
	Okbay excl 23andMe & FinnGen	Okbay excl 23andMe & UKB	1.0037	0.0056	0.6083	0.0125
	Okbay excl 23andMe & FinnGen	Okbay excl 23andMe & WLS	0.9992	0.0025	0.9874	0.0186
	Okbay excl 23andMe & FinnGen	UKB1	0.9766	0.0087	0.4788	0.0123
	Okbay excl 23andMe & FinnGen	UKB2	0.9835	0.0073	0.4651	0.0118
	Okbay excl 23andMe & FinnGen	UKB3	0.9802	0.0078	0.4682	0.012
	Okbay excl 23andMe & GS	Okbay excl 23andMe & HRS	1.0007	0.0024	0.9833	0.0184
	Okbay excl 23andMe & GS	Okbay excl 23andMe & MCTFR	1.0002	0.0025	0.9879	0.0184
	Okbay excl 23andMe & GS	Okbay excl 23andMe & NCDS	1.0007	0.0024	0.9878	0.0185
	Okbay excl 23andMe & GS	Okbay excl 23andMe & STR	0.9994	0.0024	0.9825	0.0184
	Okbay excl 23andMe & GS	Okbay excl 23andMe & UKB	1.0076	0.0058	0.6052	0.0125
	Okbay excl 23andMe & GS	Okbay excl 23andMe & WLS	1.0006	0.0024	0.9848	0.0185
	Okbay excl 23andMe & GS	UKB1	0.9745	0.0087	0.4792	0.0122
	Okbay excl 23andMe & GS	UKB2	0.9819	0.0072	0.4658	0.0119
	Okbay excl 23andMe & GS	UKB3	0.9798	0.0078	0.4684	0.012
	Okbay excl 23andMe & HRS	Okbay excl 23andMe & MCTFR	0.9997	0.0025	0.9924	0.0184
	Okbay excl 23andMe & HRS	Okbay excl 23andMe & NCDS	1.0002	0.0025	0.9923	0.0184
	Okbay excl 23andMe & HRS	Okbay excl 23andMe & STR	0.9991	0.0025	0.9869	0.0184
	Okbay excl 23andMe & HRS	Okbay excl 23andMe & UKB	1.006	0.0056	0.6145	0.0124
	Okbay excl 23andMe & HRS	Okbay excl 23andMe & WLS	1.0002	0.0025	0.9891	0.0185
	Okbay excl 23andMe & HRS	UKB1	0.9737	0.0088	0.4791	0.0123
	Okbay excl 23andMe & HRS	UKB2	0.982	0.0072	0.4642	0.0118
	Okbay excl 23andMe & HRS	UKB3	0.9802	0.0079	0.4668	0.012
	Okbay excl 23andMe & MCTFR	Okbay excl 23andMe & NCDS	0.9996	0.0025	0.9966	0.0185
	Okbay excl 23andMe & MCTFR	Okbay excl 23andMe & STR	0.9984	0.0025	0.9916	0.0184
	Okbay excl 23andMe & MCTFR	Okbay excl 23andMe & UKB	1.0032	0.0055	0.6258	0.0125
	Okbay excl 23andMe & MCTFR	Okbay excl 23andMe & WLS	0.9996	0.0025	0.9937	0.0185
	Okbay excl 23andMe & MCTFR	UKB1	0.975	0.0088	0.4768	0.0123
	Okbay excl 23andMe & MCTFR	UKB2	0.9829	0.0072	0.4621	0.0118
	Okbay excl 23andMe & MCTFR	UKB3	0.9797	0.0077	0.4656	0.0121
	Okbay excl 23andMe & NCDS	Okbay excl 23andMe & STR	0.9989	0.0025	0.9913	0.0185
	Okbay excl 23andMe & NCDS	Okbay excl 23andMe & UKB	1.0055	0.0055	0.626	0.0126
	Okbay excl 23andMe & NCDS	Okbay excl 23andMe & WLS	1.0001	0.0025	0.9934	0.0186
	Okbay excl 23andMe & NCDS	UKB1	0.9738	0.0087	0.4767	0.0123
	Okbay excl 23andMe & NCDS	UKB2	0.9821	0.0072	0.4619	0.0119
	Okbay excl 23andMe & NCDS	UKB3	0.9797	0.0078	0.4656	0.0121
	Okbay excl 23andMe & STR	Okbay excl 23andMe & UKB	1.0044	0.0057	0.6095	0.0125
	Okbay excl 23andMe & STR	Okbay excl 23andMe & WLS	0.9989	0.0025	0.9884	0.0185
	Okbay excl 23andMe & STR	UKB1	0.9759	0.0088	0.4786	0.0123
	Okbay excl 23andMe & STR	UKB2	0.9824	0.0071	0.4655	0.0119
	Okbay excl 23andMe & STR	UKB3	0.9804	0.0077	0.4679	0.0121
	Okbay excl 23andMe & UKB	Okbay excl 23andMe & WLS	1.0051	0.0055	0.6175	0.0125
	Okbay excl 23andMe & UKB	UKB1	0.943	0.017	0.0258	0.0085
	Okbay excl 23andMe & UKB	UKB2	0.9525	0.0152	0.0195	0.0081
	Okbay excl 23andMe & UKB	UKB3	0.9805	0.0169	0.0148	0.0085
	Okbay excl 23andMe & WLS	UKB1	0.9741	0.0087	0.4787	0.0123
	Okbay excl 23andMe & WLS	UKB2	0.9824	0.0073	0.4641	0.0119
	Okbay excl 23andMe & WLS	UKB3	0.9807	0.0078	0.4668	0.0122
	UKB1	UKB2	1.0149	0.0174	0.0263	0.0078
	UKB1	UKB3	0.9947	0.0176	0.0295	0.0088
	UKB2	UKB3	1.0062	0.0164	0.0374	0.0088
Highest Math	N/A
Self-Rated Math Ability	N/A
Fertility and Sexual Development
Age First Birth	23andMe	Barban	0.7367	0.0999	0.0042	0.0054
	23andMe	Mills	0.7654	0.1117	0.0043	0.0069
	23andMe	UKB1	0.7563	0.1285	0.007	0.0052
	23andMe	UKB2	0.7875	0.117	-0.0026	0.0049
	23andMe	UKB3	0.6537	0.1213	0.0099	0.0055
	Barban	Mills	1.0807	0.0173	0.4144	0.0078
	Barban	UKB1	0.9935	0.0451	0.0736	0.0057
	Barban	UKB2	0.8874	0.036	0.1092	0.0059
	Barban	UKB3	0.9363	0.0375	0.1122	0.0056
	Mills	UKB1	0.985	0.0298	0.3042	0.007
	Mills	UKB2	0.9209	0.0252	0.305	0.0068
	Mills	UKB3	0.973	0.024	0.2986	0.0067
	UKB1	UKB2	0.9438	0.0543	0.0194	0.0052
	UKB1	UKB3	0.9546	0.0555	0.0187	0.0061
	UKB2	UKB3	1.0075	0.051	0.0051	0.0052
Age First Menses	23andMe	Day	0.9953	0.0184	0.0137	0.009
	23andMe	Perry	1.0103	0.0258	0.0021	0.0082
	23andMe	UKB1	0.9851	0.0244	-0.0015	0.0081
	23andMe	UKB2	0.9813	0.027	-0.0014	0.0082
	23andMe	UKB3	0.9855	0.0278	-7.1186e-05	0.0082
	Day	Perry	1.1128	0.0134	0.4212	0.01
	Day	UKB1	0.9503	0.0157	0.1932	0.0088
	Day	UKB2	0.9665	0.0162	0.1807	0.0092
	Day	UKB3	0.977	0.0166	0.1891	0.0096
	Perry	UKB1	0.9652	0.0218	0.0109	0.0078
	Perry	UKB2	0.9972	0.0257	-0.0063	0.0081
	Perry	UKB3	0.9974	0.0234	-0.0017	0.009
	UKB1	UKB2	1.0142	0.0259	-0.0048	0.0079
	UKB1	UKB3	1.0093	0.0261	0.0039	0.0074
	UKB2	UKB3	1.0022	0.0242	-0.0038	0.0084
Age First Sex	Mills	UKB1	0.978	0.012	0.52	0.0096
	Mills	UKB2	0.9774	0.0102	0.5119	0.0096
	Mills	UKB3	0.9948	0.0138	0.5228	0.0087
	UKB1	UKB2	0.9483	0.0277	0.0091	0.0072
	UKB1	UKB3	0.9701	0.0317	0.0083	0.0065
	UKB2	UKB3	1.0086	0.0295	0.0035	0.0068
Age Voice Deepened	N/A
Childlessness - Men	UKB1	UKB2	0.6128	0.1651	0.0008	0.0045
	UKB1	UKB3	0.7544	0.215	0.0029	0.0049
	UKB2	UKB3	0.742	0.2301	0.0024	0.0045
Childlessness - Pooled	Mathieson	UKB1-men	0.7983	0.0772	0.3018	0.0055
	Mathieson	UKB1-women	0.9612	0.0536	0.3976	0.0061
	Mathieson	UKB2-men	0.8125	0.0774	0.2964	0.0058
	Mathieson	UKB2-women	1.1224	0.1121	0.3973	0.0063
	Mathieson	UKB3-men	0.7841	0.1166	0.313	0.0056
	Mathieson	UKB3-women	0.9213	0.0504	0.3833	0.0056
	UKB1-men	UKB1-women	0.5661	0.1368	0.0074	0.0045
	UKB1-men	UKB2-men	0.6128	0.1651	0.0008	0.0045
	UKB1-men	UKB2-women	0.6185	0.1579	0.0011	0.0044
	UKB1-men	UKB3-men	0.7544	0.215	0.0029	0.0049
	UKB1-men	UKB3-women	0.6262	0.1377	-0.0077	0.004
	UKB1-women	UKB3-women	0.9637	0.1183	0.0068	0.0048
	UKB1-women	UKB3-women	1.3136	0.2178	0.0013	0.0048
	UKB2-men	UKB1-women	0.4338	0.1131	0.0062	0.0042
	UKB2-men	UKB2-women	1.1249	0.2217	-0.0026	0.0049
	UKB2-men	UKB3-men	0.742	0.2301	0.0024	0.0045
	UKB2-men	UKB3-women	0.7502	0.1308	-0.0084	0.0049
	UKB2-women	UKB3-women	1.233	0.2046	0.0011	0.0049
	UKB3-men	UKB1-women	0.6789	0.1813	0.0016	0.0045
	UKB3-men	UKB2-women	0.7728	0.234	0.0017	0.0047
	UKB3-men	UKB3-women	0.4915	0.1755	0.0033	0.0052
Childlessness - Women	UKB1	UKB2	1.3136	0.2178	0.0013	0.0048
	UKB1	UKB3	0.9637	0.1183	0.0068	0.0048
	UKB2	UKB3	1.233	0.2046	0.0011	0.0049
Number Ever Born - Men	Barban	UKB1	0.7246	0.1242	0.1228	0.0045
	Barban	UKB2	0.666	0.1175	0.1948	0.0049
	Barban	UKB3	0.7148	0.1442	0.2049	0.0047
	UKB1	UKB2	1.0808	0.2054	-0.0038	0.0052
	UKB1	UKB3	0.7993	0.2284	0.0029	0.0049
	UKB2	UKB3	0.8399	0.2158	0.0006	0.0038
Number Ever Born - Pooled	Barban - men	Barban - women	0.902	0.0964	0.0112	0.0048
	Barban - men	Mathieson	0.9733	0.0541	0.2626	0.0054
	Barban - men	UKB1 - men	0.7246	0.1242	0.1228	0.0045
	Barban - men	UKB1 - women	0.8856	0.1012	-0.0013	0.0046
	Barban - men	UKB2 - men	0.666	0.1175	0.1948	0.0049
	Barban - men	UKB2 - women	0.8552	0.1057	-0.0052	0.0051
	Barban - men	UKB3 - men	0.7148	0.1442	0.2049	0.0047
	Barban - men	UKB3 - women	0.7023	0.091	-0.0032	0.005
	Barban - women	UKB1 - men	0.6334	0.1336	-0.005	0.0051
	Barban - women	UKB1 - women	0.8132	0.0832	0.1118	0.0053
	Barban - women	UKB2 - men	0.7177	0.1393	-0.0073	0.0053
	Barban - women	UKB2 - women	0.9235	0.083	0.1585	0.0048
	Barban - women	UKB3 - men	0.8214	0.1718	-0.0053	0.0046
	Barban - women	UKB3 - women	0.9283	0.0665	0.1537	0.0051
	Mathieson	Barban - women	1.0798	0.0463	0.256	0.006
	Mathieson	UKB1 - men	0.7538	0.0772	0.2734	0.0058
	Mathieson	UKB1 - women	0.8952	0.0391	0.3529	0.0053
	Mathieson	UKB2 - men	0.8201	0.0857	0.2691	0.0052
	Mathieson	UKB2 - women	0.9685	0.0479	0.3412	0.0062
	Mathieson	UKB3 - men	0.765	0.1098	0.2872	0.0057
	Mathieson	UKB3 - women	0.8481	0.032	0.3238	0.0053
	UKB1 - men	UKB1 - women	0.6478	0.1298	0.004	0.0048
	UKB1 - men	UKB2 - men	1.0808	0.2054	-0.0038	0.0052
	UKB1 - men	UKB2 - women	0.5963	0.1254	0.0021	0.0047
	UKB1 - men	UKB3 - men	0.7993	0.2284	0.0029	0.0049
	UKB1 - men	UKB3 - women	0.509	0.1171	-0.0109	0.0046
	UKB1 - women	UKB2 - women	1.0037	0.1005	0.0059	0.0043
	UKB1 - women	UKB3 - women	0.8585	0.0803	-0.0011	0.0047
	UKB2 - men	UKB1 - women	0.4951	0.1159	0.004	0.0044
	UKB2 - men	UKB2 - women	0.8749	0.1559	-0.0073	0.0051
	UKB2 - men	UKB3 - men	0.8399	0.2158	0.0006	0.0038
	UKB2 - men	UKB3 - women	0.662	0.1305	-0.0098	0.0047
	UKB2 - women	UKB3 - women	0.9657	0.0912	-0.0024	0.0053
	UKB3 - men	UKB1 - women	0.6668	0.1602	0.001	0.0047
	UKB3 - men	UKB2 - women	0.6049	0.1587	0.0082	0.0045
	UKB3 - men	UKB3 - women	0.5183	0.1307	0.0024	0.0045
Number Ever Born - Women	Barban	UKB1	0.8132	0.0832	0.1118	0.0053
	Barban	UKB2	0.9235	0.083	0.1585	0.0048
	Barban	UKB3	0.9283	0.0665	0.1537	0.0051
	UKB1	UKB2	1.0037	0.1005	0.0059	0.0043
	UKB1	UKB3	0.8585	0.0803	-0.0011	0.0047
	UKB2	UKB3	0.9657	0.0912	-0.0024	0.0053
Health
Allergy - Cat	N/A
Allergy - Dust	N/A
Allergy - Pollen	23andMe	UKB1	0.87	0.2106	0.0031	0.0056
	23andMe	UKB2	0.9262	0.1396	0.0043	0.0056
	23andMe	UKB3	0.8832	0.2505	0.0125	0.0062
	UKB1	UKB2	1.2406	0.3007	0.0039	0.0049
	UKB1	UKB3	0.9652	0.3761	0.0105	0.0044
	UKB2	UKB3	1.4462	0.3743	-0.0014	0.0049
Asthma	23andMe	Tsuo (all ancestry) excl UKB	0.8212	0.094	0.0066	0.0078
	23andMe	UKB1	0.7974	0.0948	0.0017	0.0065
	23andMe	UKB2	0.9003	0.1038	-0.0029	0.006
	23andMe	UKB3	0.8541	0.1079	0.0025	0.0065
	Tsuo (all ancestry) excl UKB	UKB1	0.9391	0.0369	0.0186	0.0106
	Tsuo (all ancestry) excl UKB	UKB2	0.9878	0.0338	0.0189	0.0103
	Tsuo (all ancestry) excl UKB	UKB3	0.8747	0.0325	0.0359	0.0097
	UKB1	UKB2	1.0544	0.0507	0.0107	0.0077
	UKB1	UKB3	1.0114	0.0495	0.01	0.0082
	UKB2	UKB3	1.0374	0.0518	0.0165	0.0074
Asthma/Eczema/Rhinitis	23andMe	Ferreira	1.0612	0.0452	0.02	0.0094
	23andMe	UKB1	1.0164	0.0536	0.0217	0.0091
	23andMe	UKB2	1.0592	0.0559	0.0214	0.0084
	23andMe	UKB3	0.9881	0.0576	0.0177	0.0083
	Ferreira	UKB1	0.9684	0.027	0.2266	0.0097
	Ferreira	UKB2	0.9959	0.0289	0.2367	0.0097
	Ferreira	UKB3	0.9232	0.0273	0.2414	0.0106
	UKB1	UKB2	0.9899	0.044	0.0206	0.0079
	UKB1	UKB3	0.9182	0.0411	0.0235	0.0086
	UKB2	UKB3	1.0396	0.0449	0.0204	0.009
Breast Cancer	UKB1	UKB2	1.0184	0.1584	0.0123	0.0064
	UKB1	UKB3	1.1673	0.1855	0.0119	0.0054
	UKB2	UKB3	0.7067	0.1392	0.0183	0.0061
	Zhang	UKB1	0.963	0.1673	0.1024	0.0254
	Zhang	UKB2	0.928	0.1078	0.0962	0.0281
	Zhang	UKB3	0.9803	0.1027	0.0792	0.0264
COPD	Tsuo (all ancestry) excl UKB	UKB1	1.0911	0.0948	0.0079	0.005
	Tsuo (all ancestry) excl UKB	UKB2	0.9165	0.0692	0.0121	0.0054
	Tsuo (all ancestry) excl UKB	UKB3	0.7957	0.0524	0.005	0.0054
	UKB1	UKB2	0.9884	0.12	0.014	0.0053
	UKB1	UKB3	0.9554	0.0912	0.004	0.0052
	UKB2	UKB3	0.8302	0.0724	0.0071	0.0048
Coronary Artery Disease	Aragam	Nelson	0.9753	0.0119	0.5448	0.0129
	Aragam	Nikpay	0.9797	0.0152	0.5087	0.0133
	Aragam	UKB1	1.0031	0.0389	0.2378	0.0087
	Aragam	UKB2	0.9433	0.0358	0.2453	0.0098
	Aragam	UKB3	0.9126	0.0306	0.236	0.01
	Nelson	Nikpay	1.0099	0.0115	0.7221	0.0085
	Nelson	UKB1	1.0328	0.047	0.1138	0.0061
	Nelson	UKB2	0.945	0.04	0.1291	0.0061
	Nelson	UKB3	0.9187	0.0362	0.1207	0.0064
	Nikpay	UKB1	0.9824	0.054	0.0073	0.0062
	Nikpay	UKB2	0.9625	0.049	0.0115	0.0067
	Nikpay	UKB3	0.8974	0.04	0.0079	0.0063
	UKB1	UKB2	1.0867	0.0801	0.0118	0.0055
	UKB1	UKB3	1.0103	0.0754	0.0125	0.0066
	UKB2	UKB3	0.9427	0.0551	0.011	0.0052
Eczema	UKB1	UKB2	1.684	1.5195	0.0106	0.0045
	UKB1	UKB3	2.631	2.292	-0.0003	0.0046
	UKB2	UKB3	1.2251	0.4342	-0.0017	0.0048
Hayfever	23andMe	UKB1	0.7891	0.1089	-0.0007	0.007
	23andMe	UKB2	0.9016	0.1068	-0.0051	0.0063
	23andMe	UKB3	0.8844	0.1157	0.0024	0.0058
	UKB1	UKB2	1.0041	0.0558	0.0103	0.0062
	UKB1	UKB3	0.9618	0.057	0.0165	0.007
	UKB2	UKB3	1.0455	0.0591	0.0133	0.0061
Inflammatory Bowel Disease	Liu	UKB1	0.9647	0.1485	0.0152	0.0071
	Liu	UKB2	0.8929	0.183	0.0133	0.0076
	Liu	UKB3	0.7476	0.1046	0.0181	0.0077
	UKB1	UKB2	0.8032	0.2506	0.008	0.0053
	UKB1	UKB3	0.7396	0.2143	0.014	0.0049
	UKB2	UKB3	0.5627	0.2179	0.0118	0.0053
Migraine	23andMe	Gormley	0.975	0.0452	0.0186	0.0073
	23andMe	Hautakangas	0.9917	0.0284	0.016	0.009
	23andMe	UKB1	0.8736	0.0461	0.0125	0.0065
	23andMe	UKB2	0.9327	0.0515	0.0061	0.0062
	23andMe	UKB3	0.936	0.0585	0.0088	0.0065
	Gormley	Hautakangas	1.1543	0.0221	0.7246	0.0079
	Gormley	UKB1	0.7671	0.0629	0.0125	0.0057
	Gormley	UKB2	0.9395	0.0755	0.0024	0.0056
	Gormley	UKB3	0.9726	0.0742	0.0085	0.0057
	Hautakangas	UKB1	0.7778	0.0473	0.1339	0.0066
	Hautakangas	UKB2	0.89	0.0523	0.1752	0.0063
	Hautakangas	UKB3	0.906	0.0474	0.1855	0.0062
	UKB1	UKB2	0.8717	0.0764	0.0141	0.0055
	UKB1	UKB3	0.9049	0.0732	0.0093	0.0052
	UKB2	UKB3	0.9524	0.0844	0.0027	0.0056
Nearsightedness	23andMe	Hysi	0.9587	0.0141	0.0533	0.0173
	23andMe	UKB1	0.9059	0.0276	0.0332	0.0104
	23andMe	UKB2	0.9487	0.043	0.0269	0.0099
	23andMe	UKB3	0.9472	0.0391	0.0179	0.0084
	Hysi	UKB1	0.9525	0.0244	0.2217	0.0121
	Hysi	UKB2	0.9732	0.0329	0.2331	0.0101
	Hysi	UKB3	0.9624	0.033	0.2219	0.0105
	UKB1	UKB2	1.0153	0.0572	0.0156	0.0067
	UKB1	UKB3	1.0008	0.0553	0.0159	0.0065
	UKB2	UKB3	1.0206	0.0683	0.0191	0.0058
Prostate Cancer	Schumacher	UKB1	0.8879	0.1183	0.0681	0.0359
	Schumacher	UKB2	0.9953	0.1214	0.0747	0.0335
	Schumacher	UKB3	1.0186	0.1484	0.0715	0.0351
	UKB1	UKB2	0.9437	0.1343	0.0193	0.0092
	UKB1	UKB3	0.9117	0.126	0.0178	0.0091
	UKB2	UKB3	1.2338	0.1573	0.0148	0.0088
Self-Rated Health	23andMe	UKB1	0.8985	0.0243	0.018	0.0085
	23andMe	UKB2	0.8589	0.0252	0.0338	0.0092
	23andMe	UKB3	0.913	0.0215	0.009	0.0078
	UKB1	UKB2	1.0159	0.0341	0.0181	0.0057
	UKB1	UKB3	0.9764	0.0335	0.0196	0.0057
	UKB2	UKB3	1.0317	0.0343	0.0136	0.0068
Type-II Diabetes	Mahajan	Scott	1.119	0.0182	0.36	0.0123
	Mahajan	UKB1	0.9652	0.0291	0.2414	0.0111
	Mahajan	UKB2	1.0279	0.025	0.2404	0.0118
	Mahajan	UKB3	0.9586	0.0217	0.2472	0.012
	Scott	UKB1	0.985	0.0482	0.0183	0.0075
	Scott	UKB2	0.9612	0.0392	0.0208	0.008
	Scott	UKB3	0.9389	0.0401	0.0195	0.0079
	UKB1	UKB2	1.0567	0.0528	0.0154	0.0064
	UKB1	UKB3	0.988	0.0525	0.0261	0.0072
	UKB2	UKB3	0.9803	0.0449	0.0304	0.0069
Personality and Well-Being
Adventurousness	N/A
Agreeableness	N/A
Cognitive Empathy	N/A
Conscientiousness	N/A
Delay Discounting	N/A
Extraversion	23andMe	vandenBerg	0.9496	0.09	-0.0037	0.0046
Left out of Social Activity	N/A
Life Satisfaction: Family	UKB1	UKB2	1.1524	0.15	-0.0003	0.0043
	UKB1	UKB3	0.8206	0.1178	0.0102	0.0046
	UKB2	UKB3	1.0113	0.1411	-0.0011	0.0047
Life Satisfaction: Finance	UKB1	UKB2	1.1313	0.1655	-0.0073	0.0048
	UKB1	UKB3	0.8163	0.1027	0.0016	0.005
	UKB2	UKB3	0.9842	0.1404	0.0049	0.0044
Life Satisfaction: Friends	UKB1	UKB2	0.9823	0.1113	0.0018	0.0049
	UKB1	UKB3	0.8236	0.1086	0.0062	0.0046
	UKB2	UKB3	0.7326	0.0969	0.0068	0.0044
Life Satisfaction: Work	UKB1	UKB2	1.0573	0.3281	-0.0009	0.0044
	UKB1	UKB3	0.9347	0.2227	0.0003	0.005
	UKB2	UKB3	0.5724	0.192	0.0028	0.0046
Loneliness	UKB1	UKB2	1.0402	0.0802	0.0065	0.005
	UKB1	UKB3	0.9846	0.0837	0.004	0.0048
	UKB2	UKB3	1.05	0.0906	0.0055	0.005
Morning Person	23andMe	UKB1	0.9167	0.0286	0.0053	0.0068
	23andMe	UKB2	0.951	0.0312	0.0063	0.0067
	23andMe	UKB3	0.9332	0.0305	0.0008	0.0064
	UKB1	UKB2	1.0274	0.0316	0.0136	0.0063
	UKB1	UKB3	0.9841	0.0288	0.011	0.0064
	UKB2	UKB3	1.0132	0.033	0.0155	0.0065
Musical Beat Synchronization	N/A
Narcissism	N/A
Neuroticism	23andMe	deMoor	0.9122	0.1464	0.0008	0.0063
	23andMe	UKB1	0.8622	0.0443	-0.0044	0.0065
	23andMe	UKB2	0.8931	0.044	-0.0106	0.0073
	23andMe	UKB3	0.8587	0.0417	-0.0041	0.0072
	deMoor	UKB1	0.9833	0.1334	0.0047	0.0065
	deMoor	UKB2	1.0475	0.139	0.0041	0.0068
	deMoor	UKB3	1.062	0.1313	0.0024	0.0071
	UKB1	UKB2	0.9847	0.0317	0.0089	0.0068
	UKB1	UKB3	0.9785	0.0297	0.0051	0.007
	UKB2	UKB3	1.0072	0.0328	0.0004	0.0081
Openness	23andMe	deMoor	0.8479	0.144	-0.0011	0.0058
Physical Activity	23andMe	Doherty	0.4598	0.0373	0.0139	0.0063
	23andMe	Wang	0.7027	0.0296	0.0104	0.0066
	Doherty	Wang	0.3768	0.0319	0.065	0.0059
Recharge by Socializing	N/A
Religious attendance	UKB1	UKB2	0.8694	0.0588	0.0127	0.005
	UKB1	UKB3	1.0166	0.0698	0.0156	0.0054
	UKB2	UKB3	1.0519	0.0661	0.0043	0.0051
Religious Belief	N/A
Risk Tolerance	23andMe	Linner	0.7528	0.0195	0.0016	0.0107
	23andMe	UKB1	0.8085	0.0344	-0.01	0.0097
	23andMe	UKB2	0.7643	0.035	-0.0038	0.0083
	23andMe	UKB3	0.6843	0.0327	0.0122	0.0079
	Linner	UKB1	1.0107	0.0192	0.559	0.0076
	Linner	UKB2	0.9931	0.021	0.5649	0.0073
	Linner	UKB3	0.9739	0.0186	0.5742	0.0072
	UKB1	UKB2	1.0694	0.0595	0.0035	0.0057
	UKB1	UKB3	1.0207	0.0548	0.0056	0.0058
	UKB2	UKB3	0.9399	0.0545	0.0057	0.0056
Subjective Well-Being	23andMe	Okbay-1kG excl 23andMe & UKB	0.7841	0.0632	0.0036	0.0069
	23andMe	Okbay-1kG excl 23andMe & UKB & ALSPAC	0.7387	0.0642	0.004	0.0068
	23andMe	Okbay-1kG excl 23andMe & UKB & FinnGen	0.8234	0.0691	0.0033	0.0071
	23andMe	Okbay-1kG excl 23andMe & UKB & HRS	0.8046	0.0773	-0.0005	0.0072
	23andMe	Okbay-1kG excl 23andMe & UKB & MCTFR	0.8031	0.0703	0.0037	0.0069
	23andMe	Okbay-1kG excl 23andMe & UKB & STR	0.7579	0.0681	0.0089	0.0067
	23andMe	UKB1	0.8191	0.0612	-0.0069	0.0067
	23andMe	UKB2	0.8071	0.0717	-0.0055	0.0059
	23andMe	UKB3	0.6514	0.0566	0.0051	0.0064
	Okbay-1kG excl 23andMe & UKB	Okbay-1kG excl 23andMe & UKB & ALSPAC	1.0401	0.0336	0.9689	0.0071
	Okbay-1kG excl 23andMe & UKB	Okbay-1kG excl 23andMe & UKB & FinnGen	1.0271	0.0354	0.9668	0.0071
	Okbay-1kG excl 23andMe & UKB	Okbay-1kG excl 23andMe & UKB & HRS	1.0842	0.0332	0.9435	0.0071
	Okbay-1kG excl 23andMe & UKB	Okbay-1kG excl 23andMe & UKB & MCTFR	1.0255	0.0362	0.9796	0.0072
	Okbay-1kG excl 23andMe & UKB	Okbay-1kG excl 23andMe & UKB & STR	1.0501	0.0319	0.9214	0.0065
	Okbay-1kG excl 23andMe & UKB	UKB1	0.8893	0.1039	-0.0023	0.0052
	Okbay-1kG excl 23andMe & UKB	UKB2	0.6977	0.1131	0.0051	0.0049
	Okbay-1kG excl 23andMe & UKB	UKB3	0.5705	0.1035	0.0056	0.0051
	Okbay-1kG excl 23andMe & UKB & ALSPAC	Okbay-1kG excl 23andMe & UKB & FinnGen	1.0709	0.0322	0.9282	0.007
	Okbay-1kG excl 23andMe & UKB & ALSPAC	Okbay-1kG excl 23andMe & UKB & HRS	1.1395	0.0324	0.9026	0.007
	Okbay-1kG excl 23andMe & UKB & ALSPAC	Okbay-1kG excl 23andMe & UKB & MCTFR	1.0674	0.0332	0.9433	0.0071
	Okbay-1kG excl 23andMe & UKB & ALSPAC	Okbay-1kG excl 23andMe & UKB & STR	1.111	0.0319	0.8785	0.0064
	Okbay-1kG excl 23andMe & UKB & ALSPAC	UKB1	0.8458	0.1015	-0.0015	0.0052
	Okbay-1kG excl 23andMe & UKB & ALSPAC	UKB2	0.6408	0.1128	0.0055	0.0051
	Okbay-1kG excl 23andMe & UKB & ALSPAC	UKB3	0.5562	0.104	0.0031	0.005
	Okbay-1kG excl 23andMe & UKB & FinnGen	Okbay-1kG excl 23andMe & UKB & HRS	1.1289	0.0337	0.8988	0.007
	Okbay-1kG excl 23andMe & UKB & FinnGen	Okbay-1kG excl 23andMe & UKB & MCTFR	1.0648	0.0332	0.9401	0.0071
	Okbay-1kG excl 23andMe & UKB & FinnGen	Okbay-1kG excl 23andMe & UKB & STR	1.0911	0.0333	0.8742	0.0065
	Okbay-1kG excl 23andMe & UKB & FinnGen	UKB1	0.9517	0.1152	-0.0034	0.0052
	Okbay-1kG excl 23andMe & UKB & FinnGen	UKB2	0.7787	0.1269	0.0054	0.0052
	Okbay-1kG excl 23andMe & UKB & FinnGen	UKB3	0.6054	0.1124	0.0055	0.0053
	Okbay-1kG excl 23andMe & UKB & HRS	Okbay-1kG excl 23andMe & UKB & MCTFR	1.1255	0.0322	0.9157	0.0071
	Okbay-1kG excl 23andMe & UKB & HRS	Okbay-1kG excl 23andMe & UKB & STR	1.1937	0.0362	0.8444	0.0064
	Okbay-1kG excl 23andMe & UKB & HRS	UKB1	0.922	0.1193	-0.0023	0.0052
	Okbay-1kG excl 23andMe & UKB & HRS	UKB2	0.7701	0.1291	0.0019	0.0051
	Okbay-1kG excl 23andMe & UKB & HRS	UKB3	0.5962	0.111	0.0056	0.005
	Okbay-1kG excl 23andMe & UKB & MCTFR	Okbay-1kG excl 23andMe & UKB & STR	1.095	0.033	0.8915	0.0065
	Okbay-1kG excl 23andMe & UKB & MCTFR	UKB1	0.9324	0.1136	-0.0027	0.0051
	Okbay-1kG excl 23andMe & UKB & MCTFR	UKB2	0.7458	0.1272	0.0048	0.005
	Okbay-1kG excl 23andMe & UKB & MCTFR	UKB3	0.6127	0.1103	0.0049	0.0051
	Okbay-1kG excl 23andMe & UKB & STR	UKB1	0.8181	0.1077	-0.0012	0.0051
	Okbay-1kG excl 23andMe & UKB & STR	UKB2	0.7123	0.126	0.0035	0.0048
	Okbay-1kG excl 23andMe & UKB & STR	UKB3	0.465	0.1115	0.0084	0.0052
	UKB1	UKB2	1.144	0.125	-0.0018	0.0051
	UKB1	UKB3	0.7719	0.0967	0.0044	0.0044
	UKB2	UKB3	0.8821	0.1029	-3.0419e-05	0.0046
Psychiatric
Anorexia Nervosa	Duncan	UKB	0.9396	0.2494	0.0022	0.0044
	Duncan	Watson	1.0461	0.0625	0.4486	0.0077
	UKB	Watson	0.9291	0.1605	0.1652	0.0074
Attention Deficit Hyperactivity Disorder (ADHD)	23andMe	Demontis2023	0.6184	0.0931	0.0069	0.0059
Autism Spectrum Disorder	N/A
Bipolar Disorder	Mullins	Stahl	1.0417	0.0091	0.6711	0.0102
	Mullins	UKB1	1.0608	0.3301	0.0353	0.0061
	Mullins	UKB2	0.8024	0.1218	0.0328	0.0065
	Mullins	UKB3	0.8849	0.1516	0.0438	0.0065
	Stahl	UKB1	1.1333	0.4059	0.0151	0.0065
	Stahl	UKB2	0.7727	0.1172	0.0043	0.0066
	Stahl	UKB3	0.9872	0.1692	0.0044	0.0068
	UKB1	UKB2	0.5649	0.3389	0.008	0.0047
	UKB1	UKB3	1.6631	0.5784	-0.0028	0.0049
	UKB2	UKB3	0.848	0.3104	0.0014	0.0044
Depressive Symptoms	23andMe	GERA	0.9909	0.1839	0.0054	0.007
	23andMe	UKB1	0.6132	0.0372	-0.005	0.0063
	23andMe	UKB2	0.5925	0.0369	0.0077	0.0058
	23andMe	UKB3	0.6541	0.0365	-0.0009	0.0062
	23andMe	Wray excl UKB	0.869	0.0372	0.0031	0.0069
	GERA	UKB1	0.8437	0.1789	-0.0071	0.0066
	GERA	UKB2	0.9424	0.1892	-0.0073	0.0069
	GERA	UKB3	0.858	0.1647	-0.0016	0.007
	GERA	Wray excl UKB	0.8338	0.1059	0.467	0.0076
	UKB1	UKB2	0.9486	0.0476	0.014	0.005
	UKB1	UKB3	0.9703	0.0452	0.0045	0.0059
	UKB2	UKB3	1.0201	0.0475	-0.0031	0.0057
	Wray excl UKB	UKB1	0.7955	0.0489	-0.0071	0.0066
	Wray excl UKB	UKB2	0.8342	0.0462	-0.0057	0.0062
	Wray excl UKB	UKB3	0.8008	0.0486	-0.0013	0.0065
Insomnia	23andMe	Jansen	0.6871	0.0206	0.0059	0.0077
	23andMe	UKB1	0.7448	0.0346	-0.0041	0.0067
	23andMe	UKB2	0.6697	0.036	0.0018	0.0063
	23andMe	UKB3	0.7027	0.0403	0.0134	0.0071
	Jansen	UKB1	1.0636	0.0351	0.3245	0.0056
	Jansen	UKB2	1.0076	0.0233	0.5849	0.0068
	Jansen	UKB3	1.0086	0.0233	0.6204	0.0064
	UKB1	UKB2	1.0414	0.0649	0.0025	0.0049
	UKB1	UKB3	1.0972	0.0781	0.0038	0.0044
	UKB2	UKB3	1.0177	0.0736	0.0098	0.0051
Schizophrenia	Trubetskoy	UKB1	0.7031	0.1526	0.0154	0.0076
	Trubetskoy	UKB2	1.1557	0.4721	-0.0019	0.0074
	Trubetskoy	UKB3	1.1595	0.5289	0.0026	0.0067
	UKB1	UKB2	1.2096	0.6599	-0.0139	0.005
	UKB1	UKB3	0.7883	0.4107	0.0009	0.0045
	UKB2	UKB3	0.9056	0.7129	0.0044	0.0046
Substance use
Alcohol Misuse	23andMe	UKB1	0.4415	0.1379	0.0136	0.0052
	23andMe	UKB2	0.6594	0.1473	0.0078	0.0049
	23andMe	UKB3	0.7034	0.152	0.0055	0.0048
	23andMe	Walters	0.1617	0.1634	0.0058	0.0047
	UKB1	UKB2	1.1057	0.1123	-0.0059	0.0049
	UKB1	UKB3	1.0609	0.1447	-0.0043	0.005
	UKB2	UKB3	1.0218	0.1377	0.0065	0.0051
	Walters	UKB1	0.4386	0.09	0.0008	0.0042
	Walters	UKB2	0.6577	0.1228	-0.0071	0.0049
	Walters	UKB3	0.4193	0.1244	0.0062	0.0045
Age Smoking Initiation	23andMe	Liu	0.7638	0.0644	0.0086	0.005
	23andMe	Saunders	0.8003	0.0617	0.0063	0.005
	23andMe	Saunders excl UKB	0.8425	0.085	0.0071	0.0041
	23andMe	UKB1	0.8647	0.181	0.0017	0.0046
	23andMe	UKB2	0.8161	0.2039	0.0053	0.0046
	23andMe	UKB3	0.7158	0.1351	-0.0001	0.0045
	Liu	Saunders	1.0218	0.0086	0.8381	0.0076
	Liu	Saunders excl UKB	1.0848	0.0334	0.5431	0.0064
	Liu	UKB1	1.1443	0.1694	0.2327	0.0056
	Liu	UKB2	0.8443	0.1283	0.2974	0.0053
	Liu	UKB3	0.824	0.0701	0.291	0.0054
	Saunders	Saunders excl UKB	1.0209	0.0229	0.7217	0.0069
	Saunders	UKB1	1.2225	0.1877	0.2848	0.0059
	Saunders	UKB2	0.9245	0.1402	0.2995	0.0054
	Saunders	UKB3	0.9132	0.0768	0.2912	0.0053
	Saunders excl UKB	UKB1	1.3835	0.2571	-0.0079	0.0054
	Saunders excl UKB	UKB2	0.857	0.2043	0.0073	0.0049
	Saunders excl UKB	UKB3	0.916	0.1273	0.0013	0.0049
	UKB1	UKB2	1.2225	0.3356	0.0051	0.0044
	UKB1	UKB3	1.288	0.2872	-0.0074	0.0046
	UKB2	UKB3	0.5638	0.1934	0.0086	0.0047
Cannabis Use	23andMe	Stringer	0.916	0.2204	-0.0083	0.0052
	23andMe	UKB1	0.423	0.1478	0.0107	0.0054
	23andMe	UKB2	1.0478	0.2106	-0.0027	0.0051
	23andMe	UKB3	1.0286	0.229	-0.0016	0.0052
	Stringer	UKB1	0.621	0.1248	-0.0012	0.0053
	Stringer	UKB2	0.8626	0.1384	-0.0022	0.0049
	Stringer	UKB3	0.6299	0.1431	0.0076	0.0057
	UKB1	UKB2	1.0458	0.1269	0.0009	0.005
	UKB1	UKB3	1.0268	0.1288	0.0105	0.0055
	UKB2	UKB3	1.2115	0.1639	0.0031	0.0049
Cigarettes per Day	23andMe	Liu	0.9015	0.0394	0.0045	0.0102
	23andMe	Saunders	0.8916	0.0405	0.0071	0.0126
	23andMe	Saunders excl UKB	0.9691	0.0442	-0.0007	0.0095
	23andMe	UKB1	0.8392	0.096	0.0092	0.0065
	23andMe	UKB2	0.8011	0.0728	0.0047	0.0062
	23andMe	UKB3	0.8384	0.0721	-0.0006	0.0058
	Liu	Saunders	1.0165	0.01	0.82	0.0186
	Liu	Saunders excl UKB	1.044	0.0135	0.5765	0.0138
	Liu	UKB1	1.0236	0.0639	0.2938	0.0083
	Liu	UKB2	0.949	0.0436	0.3553	0.009
	Liu	UKB3	0.9187	0.0462	0.3589	0.0088
	Saunders	Saunders excl UKB	1.0045	0.0129	0.7533	0.0168
	Saunders	UKB1	1.0409	0.0563	0.3729	0.0094
	Saunders	UKB2	0.96	0.0431	0.3715	0.0105
	Saunders	UKB3	0.9709	0.0445	0.3733	0.0098
	Saunders excl UKB	UKB1	1.0307	0.0825	0.0034	0.0069
	Saunders excl UKB	UKB2	0.9383	0.0651	-0.0025	0.0078
	Saunders excl UKB	UKB3	0.9531	0.0667	-0.0026	0.0079
	UKB1	UKB2	1.1383	0.1243	-0.0006	0.0057
	UKB1	UKB3	1.0325	0.1157	0.0099	0.0051
	UKB2	UKB3	0.8916	0.0914	0.0041	0.0057
Drinks per Week	23andMe	Liu	0.8064	0.025	0.0053	0.0063
	23andMe	Saunders	0.7995	0.0245	0.0108	0.0072
	23andMe	Saunders excl UKB	0.7718	0.0352	0.0082	0.006
	23andMe	UKB1	0.784	0.0442	0.005	0.0058
	23andMe	UKB2	0.718	0.0454	0.0061	0.0059
	23andMe	UKB3	0.6945	0.0402	0.0091	0.0053
	Liu	Saunders	1.0024	0.0046	0.8928	0.0102
	Liu	Saunders excl UKB	0.9691	0.0153	0.5574	0.0073
	Liu	UKB1	0.9387	0.0289	0.2864	0.0063
	Liu	UKB2	0.9581	0.0273	0.3339	0.0064
	Liu	UKB3	0.9166	0.0231	0.334	0.0063
	Saunders	Saunders excl UKB	0.9763	0.0137	0.6801	0.0088
	Saunders	UKB1	0.9259	0.0273	0.381	0.0072
	Saunders	UKB2	0.9542	0.0277	0.3771	0.0071
	Saunders	UKB3	0.9311	0.0237	0.3673	0.0069
	Saunders excl UKB	UKB1	0.8526	0.0477	0.0091	0.0059
	Saunders excl UKB	UKB2	0.844	0.0512	0.0087	0.0057
	Saunders excl UKB	UKB3	0.8803	0.0413	-0.0017	0.0057
	UKB1	UKB2	0.9978	0.0628	0.0036	0.0055
	UKB1	UKB3	0.9434	0.0563	0.0042	0.0051
	UKB2	UKB3	0.8794	0.0537	0.0023	0.0052
Ever Smoker	23andMe	Liu	0.9423	0.0105	0.0082	0.0087
	23andMe	Saunders	0.9295	0.0102	0.0073	0.0101
	23andMe	Saunders excl UKB	0.8666	0.0152	0.0086	0.0081
	23andMe	UKB1	0.9648	0.0199	-0.0095	0.0075
	23andMe	UKB2	0.9528	0.023	0.0027	0.0079
	23andMe	UKB3	0.9814	0.022	0.0044	0.0076
	Liu	Saunders	0.9959	0.0034	0.7267	0.0109
	Liu	Saunders excl UKB	0.951	0.0089	0.46	0.0085
	Liu	UKB1	0.942	0.0146	0.304	0.0067
	Liu	UKB2	0.9893	0.0141	0.3488	0.0071
	Liu	UKB3	0.9928	0.0162	0.3528	0.007
	Saunders	Saunders excl UKB	0.9469	0.0069	0.6826	0.0106
	Saunders	UKB1	0.9535	0.014	0.3728	0.0085
	Saunders	UKB2	0.9934	0.0143	0.3595	0.0081
	Saunders	UKB3	0.9909	0.0151	0.3617	0.0086
	Saunders excl UKB	UKB1	0.8584	0.0232	0.0021	0.0065
	Saunders excl UKB	UKB2	0.901	0.023	-0.0044	0.0064
	Saunders excl UKB	UKB3	0.9059	0.0256	-0.0041	0.0069
	UKB1	UKB2	0.9793	0.0303	0.0056	0.0062
	UKB1	UKB3	0.9488	0.0331	0.0136	0.0058
	UKB2	UKB3	1.0332	0.0315	0.0012	0.0065
Smoking Cessation	23andMe	Liu	0.9	0.0449	0.0085	0.0067
	23andMe	Saunders	0.8642	0.0327	-0.0003	0.0076
	23andMe	Saunders excl UKB	0.8646	0.0468	0.0006	0.006
	23andMe	UKB1	0.9171	0.0875	0.0025	0.0059
	23andMe	UKB2	0.8855	0.0777	0.0032	0.0056
	23andMe	UKB3	0.9073	0.0843	0.0001	0.006
	Liu	Saunders	0.9934	0.0148	0.7001	0.0097
	Liu	Saunders excl UKB	0.9743	0.0302	0.5203	0.0071
	Liu	UKB1	0.9366	0.0752	0.1933	0.0055
	Liu	UKB2	0.896	0.0625	0.249	0.006
	Liu	UKB3	0.9619	0.0652	0.2481	0.0064
	Saunders	Saunders excl UKB	0.9023	0.019	0.7522	0.0085
	Saunders	UKB1	0.9036	0.0676	0.2324	0.0066
	Saunders	UKB2	0.9307	0.0568	0.2359	0.0063
	Saunders	UKB3	0.9565	0.063	0.2323	0.0072
	Saunders excl UKB	UKB1	0.8096	0.0964	0.0065	0.0053
	Saunders excl UKB	UKB2	0.8594	0.0935	0.0004	0.0051
	Saunders excl UKB	UKB3	0.8943	0.0928	-0.0025	0.0052
	UKB1	UKB2	1.098	0.1278	-0.0022	0.0049
	UKB1	UKB3	1.1595	0.147	-0.0031	0.005
	UKB2	UKB3	0.8882	0.1076	0.0081	0.0046
Notes: "rg" is genetic correlation. "Intercept" is the bivariate LD score regression intercept. "SE" is standard error.

[truncated: 7 more sheets: 11. Input GWAS meta-analyses, 12. Cross-pheno rg, 13. Neff filter, 14. Validation phenotypes, 15. Descriptives, 16. Parental genotype imputatio, 17. Parental PGI QC]
